1

2 **Evolving Infection Paradox of SARS-CoV-2: Fitness Costs Virulence?**

3

4 A. S. M. Rubayet Ul Alam<sup>1#</sup>, Ovinu Kibria Islam<sup>1#</sup>, Md. Shazid Hasan<sup>1</sup>, Mir Raihanul Islam<sup>2</sup>,  
5 Shafi Mahmud<sup>3</sup>, Hassan M. Al-Emran<sup>4</sup>, Iqbal Kabir Jahid<sup>1</sup>, Keith A. Crandall<sup>5</sup>, M. Anwar  
6 Hossain<sup>6,7\*</sup>

7

8 1 Department of Microbiology, Jashore University of Science and Technology, Jashore-7408,  
9 Bangladesh

10 2 BRAC James P Grant School of Public Health, BRAC University, Bangladesh

11 3 Genetic Engineering and Biotechnology, University of Rajshahi, Rajshahi-6205, Bangladesh

12 4 Department of Biomedical Engineering, Jashore University of Science and Technology,  
13 Jashore-7408, Bangladesh

14 5 Computational Biology Institute and Department of Biostatistics & Bioinformatics, Milken  
15 Institute School of Public Health, The George Washington University, Washington, DC,  
16 USA

17 6 Jashore University of Science and Technology, Jashore-7408, Bangladesh

18 7 Department of Microbiology, University of Dhaka, Dhaka-1000, Bangladesh

19

20

21 **\*Correspondence**

22 M. Anwar Hossain, Jashore University of Science and Technology, Jashore-7408,  
23 Bangladesh.

24 E-mail: [hossaina@du.ac.bd](mailto:hossaina@du.ac.bd), Contact: +8801708818101

25

26

27 # Authors contributed equally

28

29 **ABSTRACT**

30 **Background:** SARS-CoV-2 is continuously spreading worldwide at an  
31 unprecedented scale and evolved into seven clades according to GISAID where four (G, GH,  
32 GR and GV) are globally prevalent in 2020. These major predominant clades of SARS-CoV-  
33 2 are continuously increasing COVID-19 cases worldwide; however, after an early rise in  
34 2020, the death-case ratio has been decreasing to a plateau. G clade viruses contain four co-  
35 occurring mutations in their genome (C241T+C3037T+C14408T:  
36 RdRp.P323L+A23403G:spike.D614G). GR, GH, and GV strains are defined by the presence  
37 of these four mutations in addition to the clade-featured mutation in GGG28881-  
38 28883AAC:N. RG203-204KR, G25563T:ORF3a.Q57H, and  
39 C22227T:spike.A222V+C28932T-N.A220V+G29645T, respectively. The research works are  
40 broadly focused on the spike protein mutations that have direct roles in receptor binding,  
41 antigenicity, thus viral transmission and replication fitness. However, mutations in other  
42 proteins might also have effects on viral pathogenicity and transmissibility. How the clade-  
43 featured mutations are linked with viral evolution in this pandemic through gearing their  
44 fitness and virulence is the main question of this study.

45 **Methodology:** We thus proposed a hypothetical model, combining a statistical and  
46 structural bioinformatics approach, endeavors to explain this infection paradox by describing  
47 the epistatic effects of the clade-featured co-occurring mutations on viral fitness and  
48 virulence.

49 **Results and Discussion:** The G and GR/GV clade strains represent a significant  
50 positive and negative association, respectively, with the death-case ratio (incidence rate ratio  
51 or IRR = 1.03,  $p < 0.001$  and IRR= 0.99/0.97,  $p < 0.001$ ), whereas GH clade strains showed  
52 no association with the Docking analysis showed the higher infectiousness of a spike mutant  
53 through more favorable binding of G614 with the elastase-2. RdRp mutation p.P323L  
54 significantly increased genome-wide mutations ( $p < 0.0001$ ) since more expandable RdRp  
55 (mutant)-NSP8 interaction may accelerate replication. Superior RNA stability and structural  
56 variation at NSP3:C241T might impact upon protein or RNA interactions. Another silent  
57 5'UTR:C241T mutation might affect translational efficiency and viral packaging. These G-  
58 featured co-occurring mutations might increase the viral load, alter immune responses in host

59 and hence can modulate intra-host genomic plasticity. An additional viroporin  
60 ORF3a:p.Q57H mutation, forming GH-clade, prevents ion permeability by cysteine (C81)-  
61 histidine (H57) inter-transmembrane-domain interaction mediated tighter constriction of the  
62 channel pore and possibly reduces viral release and immune response. GR strains, four G  
63 clade mutations and N:p.RG203-204KR, would have stabilized RNA interaction by more  
64 flexible and hypo-phosphorylated SR-rich region. GV strains seemingly gained the  
65 evolutionary advantage of superspreading event through confounder factors; nevertheless,  
66 N:p.A220V might affect RNA binding.

67 **Conclusion:** These hypotheses need further retrospective and prospective studies to  
68 understand detailed molecular and evolutionary events featuring the fitness and virulence of  
69 SARS-CoV-2.

70

#### 71 **Key words**

72 SARS-CoV-2, COVID-19, Infection Paradox, Fitness, Virulence, Clades, Co-occurring  
73 mutations

74

75

76

77

78

79

#### 80 **Highlights**

- 81 • We speculated an association of particular SARS-CoV-2 clade with death rate.
- 82 • The polymerase mutant virus can speed up replication that corresponds to higher  
83 mutations.
- 84 • The impact on viral epistasis by evolving mutations in SARS-CoV-2.
- 85 • How the virus changes its genotype and circulate with other types given the overall  
86 dynamics of the epidemics?

- 87 • Human intervention seems to work well to control the viral virulence. This hygiene  
88 practice will control the overall severity of the pandemic situation as recommended by the  
89 WHO. Our work has given the same message but explain with the dominant co-occurring  
90 mutations.

## 91 **1. Introduction**

92 Severe acute respiratory syndrome coronavirus 2 (SARS-CoV-2) has caused the COVID-  
93 19 pandemic since the beginning of 2020 <sup>1</sup>. This highly contagious virus spread in 213  
94 countries infecting over 11.3 million people including half a million deaths within the first six  
95 months <sup>2</sup>. SARS-CoV-2 has possessed some extraordinary attributes that make it extremely  
96 infectious: high replication rate, large burst size, high stability in the environment, strong  
97 binding efficiency of S protein receptor-binding domain (RBD) with human angiotensin-  
98 converting enzyme 2 (ACE2) receptor, and additional furin cleavage site in S protein <sup>3-5</sup>. In  
99 addition to those, it has proofreading capability ensuring high-fidelity replication <sup>6</sup>. The virus  
100 contains four major structural proteins: spike glycoprotein (S), envelope (E), membrane (M),  
101 and nucleocapsid (N) proteins along with 16 nonstructural proteins (NSP1 to NSP16) and  
102 seven accessory proteins (ORF3a, ORF6, ORF7a, ORF7b, ORF8a, ORF8b, and ORF10) <sup>7,8</sup>.

103 Mutational spectra within the SARS-CoV-2 genome <sup>9,10</sup>, spike protein <sup>11</sup>, RdRp <sup>12</sup>,  
104 ORF3a <sup>13</sup>, and N protein <sup>14</sup> are reported where Islam et al. (2020) and Rahman et al. (2020)  
105 studied the possible impact of mutations on the virulence of a strain <sup>10</sup>. SARS-CoV-2 has  
106 been classified into seven major clades, such as G, GH, GR, GV, S, V, and L by GISAID  
107 based on the dominant mutations <sup>15</sup>. Yin <sup>16</sup> reported the leader sequence mutation 241C > T is  
108 co-occurring with three other mutations, 3037C > T (NSP3: C318T), 14408C > T (RdRp:  
109 p.P323L), and 23403A > G (S: p.D614G). GISAID referred these co-occurring mutation  
110 containing viruses as clade G, a viral strain over the wild-type <sup>17,18</sup>. These clade G or lineage  
111 B.1 viruses were dominant in Europe <sup>17</sup> and the east coast of USA <sup>19</sup> during the earlier stages  
112 of the pandemic that further spread in Southeast Asia <sup>20,21</sup> and Oceania <sup>18</sup>. Remarkably, this  
113 mutation variant is reported to be more transmissible <sup>17</sup> and was speculated to cause high  
114 mortality in USA <sup>22</sup>. The GR clade or lineage B.1.1 was classified with additional  
115 trinucleotide mutations at 28881-28883 (GGG>AAC) creating two consecutive amino acid  
116 changes, R203K and G204R, in N protein <sup>18</sup>. The GR strains are now the dominant type  
117 causing more than one-third of infection cases globally <sup>15</sup>. Another derivative of G clade is  
118 GH or lineage B.1.3-B.1.66, B.1.351, characterized by an additional ORF3a:p.Q57H  
119 mutation frequently found in the USA and Europe <sup>18,23</sup>. The newest variant GV or lineage

120 B.1.177 is responsible for COVID-19 cases in Europe featuring an A222V mutation in the S  
121 protein with other mutations of the clade G. N: A220, ORF10: V30L, and three other  
122 synonymous mutations, namely T445C, C6286T, and C26801G, are also found in this clade  
123 <sup>24</sup>.

124 The most frequently observed mutation is D614G of S protein <sup>25</sup>, which has direct roles in  
125 receptor binding, and immunogenicity, thus viral immune-escape, transmission, and  
126 replication fitness. The role of other dominant mutations remains largely underestimated.  
127 However, the ORF3a:p.Q57H <sup>23</sup> and RdRp:p.P323L <sup>26</sup> have recently been investigated while  
128 the effect of NSP3: C318T, 5'UTR: C241T, N:p.RG203-203KR, and N:p.A220V is still being  
129 overlooked. Mutations in other proteins could also have effects on viral pathogenicity and  
130 transmissibility. How the clade-featured mutations are linked with viral evolution in this  
131 pandemic through gearing their fitness and virulence is the main question of this study.

132 Different mutations may work independently or through epistatic interaction, thus it is  
133 difficult to spot exactly when a single mutation or co-occurring mutations become dominant  
134 in populations through evolutionary fitness. Several co-occurring mutations identified in  
135 SARS-CoV-2 may have complementary roles in changing its virulence and the infection  
136 dynamics of COVID-19 pandemic. Yet, many questions remain: When are 'co-occurring  
137 mutations' first observed? Why are particular clades, GV and GR, outcompeting their  
138 speculative ancestor G clade? What are the impacts of these mutations on protein structures  
139 and what are their functional roles? Do these mutant proteins interact together? Is there any  
140 role of the coevolved 'silent' mutations? Do these mutations have any impact on viral fitness  
141 and virulence? We attempt to answer these questions by *in silico* molecular insights of  
142 SARS-CoV-2 mutants and possible interactions of coevolved proteins.

143 This study aims to identify the prevalence of dominant co-occurring mutations of G, GH,  
144 GR, and GV strains circulating in all over the world, correlation of the clades with death-case  
145 ratio, probable individual and/or synergistic impact of those mutants upon virulence in terms  
146 of viral entry and fusion, evasion of host cell lysis, replication rate, ribonucleoprotein  
147 stability, protein-protein interactions, translational capacity, and ultimately the combined  
148 effect on fitness and virulence.

## 149 **2. Materials and Methods**

### 150 **2.1 Retrieval of Sequences and Mutation Analyses**

151 This study analyzed 225,526 high-coverage (<1% Ns and <0.05% unique amino acid  
152 mutations) and complete (>29,000 nucleotide) genome sequences with specified collection  
153 date from a total of 3,16,166 sequences submitted to GISAID until January 03, 2021. We  
154 sifted the sequences generated from the non-human host out from the dataset. The Wuhan-  
155 Hu-1 (Accession ID- NC\_045512.2)<sup>27</sup> isolate was used as the reference genome.

156 A python script was used to partition a significant part of the dataset into two subsets  
157 based on the RdRp: C14408T mutation and estimated the genome-wide variations (single  
158 nucleotide changes) for each strain. For the genome-wide mutation analysis, a total of 37,179  
159 sequences (RdRp wild type or ‘C’ variant: 9,815; and mutant or ‘T’ variant: 27,364) were  
160 analyzed from our dataset. The frequency of mutations was tested for significance with the  
161 Wilcoxon signed-rank test between RdRp ‘C’ variant and ‘T’ variant using IBM SPSS  
162 statistics 25.

163 Random effect poisson regression model was performed in STATA v13.0 to identify the  
164 association between death-case ratio and different clade strains (G, GH, GR, and GV); both  
165 unadjusted and adjusted incidence risk ratio (IRR) were estimated where time was introduced  
166 as a panel variable<sup>28</sup>.

## 167 **2.2 Epidemiological Data Analysis and Time Plot Generation**

168 In this study, we report the prevalence of these dominant clades in 2020, both  
169 individually and in combination, with disease progression and deaths allowing us to infer  
170 increasing fitness of the SARS-CoV-2. A weekly-based time plot of G, GH, GR, and GV  
171 clade frequencies with infection and death-cases was generated from 23 December 2019 until  
172 January 3, 2021 that counted a total of 54 weeks (supplementary table S1). The total number  
173 of infections and deaths by weeks were extracted from the WHO 2019-nCoV situation  
174 reports. The case-death ratio was estimated by dividing the number of deaths of a particular  
175 week by the number of cases identified in the earlier week based on the conservative  
176 assumption of a one-week interval between diagnosis and death<sup>29</sup>.

177 Regional time plots of those clades were also generated monthly (from January to  
178 June) with frequencies of new infections, deaths, and death-case ratio based on the available  
179 data on WHO situation reports<sup>30</sup>. The studied sequences were divided into six regions;  
180 Europe (n= 145,254), Americas (n= 48,014), Eastern Mediterranean (n=3,103), Southeast  
181 Asia (n= 4,134), West Pacific (n= 16,974), and Africa (n= 2,740).

182        **2.3 Stability, Secondary and Three-Dimensional Structure Prediction Analyses of S,**  
183 **RdRp, ORF3a, and N Proteins**

184            DynaMut <sup>31</sup> and FoldX 5.0 <sup>32,33</sup> were used to determine the stability of both wild and  
185 mutant variants of N, RdRp, S, and ORF3a proteins. PredictProtein <sup>34</sup> was utilized for  
186 analyzing and predicting the possible secondary structure and solvent accessibility of both  
187 wild and mutant variants of those proteins. The SWISS-MODEL homology modeling  
188 webtool <sup>35</sup> was utilized for generating the three-dimensional (3D) structures of the RdRp, S,  
189 and ORF3a protein using 7c2k.1.A, 6xr8.1.A, and 6xdc.1.A PDB structure as the template,  
190 respectively. Modeller v9.25 <sup>36</sup> was also used to generate the structures against the same  
191 templates. I-TASSER <sup>37</sup> with default protein modeling mode was employed to construct the  
192 N protein 3D structure of wild and mutant type since there was no template structure  
193 available for the protein. The built-in structural assessment tools (Ramachandran plot,  
194 MolProbity, and Quality estimate) of SWISS-MODEL were used to check the quality of  
195 generated structures.

196        **2.4 Molecular Docking and Dynamics of RdRp-NSP8 and S protein-Elastase2**  
197 **Complex**

198            Determination of the active sites affected by binding is a pre-requisite for docking  
199 analysis. We chose 323 along with the surrounding residues (315-324) of RdRp and the  
200 residues 110 to 122 of NSP8 monomer as the active sites based on the previously reported  
201 structure <sup>38</sup>. The passive residues were defined automatically where all surface residues were  
202 selected within the 6.5°A radius around the active residues. The molecular docking of the  
203 wild and predicted mutated RdRp with the NSP8 monomer from the PDB structure 7C2K  
204 was performed using the HADDOCKv2.4 to evaluate the interaction <sup>39</sup>. The binding affinity  
205 of the docked RdRp-NSP8 complex was predicted using the PRODIGY <sup>40</sup>. The number and  
206 specific interfacial contacts (IC) for each of the complexes were identified.

207            The human neutrophil elastase (hNE) or elastase-2 (PDB id: 5A0C) was chosen for  
208 docking of the S protein, based on earlier reports <sup>41</sup>. Here we employed CPORT <sup>42</sup> to find out  
209 the active and passive protein-protein interface residues of hNE. The S protein active sites  
210 were chosen based on the target region (594-638) interacting with the elastase-2. The passive  
211 residues of S protein were defined automatically as mentioned for RdRp-NSP8 docking  
212 analysis. Afterward, we individually docked wild (614D) and mutated (614G) S protein with  
213 the hNE using HADDOCK 2.4. The binding affinity of the docked complexes, as well as the

214 number and specific interfacial contacts (IC), were predicted as performed after RdRP-NSP8  
215 docking. We employed HDOCK server<sup>43</sup> with specifying the active binding sites residues for  
216 predicting the molecular docking energy.

217 The structural stability of the protein complex and their variations were assessed  
218 through YASARA Dynamics software package<sup>44</sup>. The AMBER14 force field<sup>45</sup> was used for  
219 these four systems, and the cubic simulation cell was created. The TIP3P (at 0.997 g/L<sup>-1</sup>, 25C,  
220 and 1 atm) water solvation model was used, and steepest gradient energy minimization  
221 techniques by simulated annealing method was used for initial energy minimization process.  
222 The hydrogen bond network system was optimized. The simulation cell was extended 20Å in  
223 all cases of the protein to move freely<sup>46</sup>. The PME or particle mesh Ewald methods was  
224 applied to calculate the long-range electrostatic interaction by a cut off radius of 8Å<sup>47</sup>. The  
225 Berendsen thermostat was applied to maintain the temperature of the simulation cell. The  
226 simulation system was neutralized by the addition of 0.9% NaCl, pH 7.4, and 310K  
227 temperature. The time step of the simulation was set as 1.25fs<sup>46</sup>. The simulation trajectories  
228 were saved after every 100ps. Finally, the molecular dynamics simulation was conducted for  
229 100ns to analyze root mean square deviation (RMSD), root mean square fluctuation (RMSF),  
230 radius of gyration (Rg), solvent accessible surface area (SASA), hydrogen bond<sup>48-51</sup>.

### 231 **2.5 Mutational Analysis of Transmembrane Domain 1 of ORF3a and SR-domain** 232 **of N protein**

233 The complete genome of 12 pangolin derived coronavirus strains, as well as 38 bat,  
234 civet and human SARS-CoVs, were downloaded from GISAID and NCBI, respectively for  
235 the mutational comparison between the SARS-CoV and SARS-CoV-2. We mainly targeted  
236 transmembrane domain 1 (TM1), which covers 41 to 63 residues, of ORF3a to find the  
237 identical mutation and scan overall variation in TM1. In the case of the N protein, CoVserver  
238 of GISAID was used to study the frequent mutations other than our target ones (RG→KR:  
239 203-04) to bolster our speculation on the change and subsequent effects of those surrounding  
240 variations on the functions of the protein. A generalized comparison between SARS-CoV and  
241 SARS-CoV-2 reference sequences was performed to identify mutation in the SR-rich region  
242 that will help to postulate on N protein functions of novel coronavirus based on previous  
243 related research on SARS-CoV.

### 244 **2.6 Analyzing RNA Folding prediction of 5'UTR and NSP3**



245 The Mfold web server <sup>52</sup> was used with default parameters to check the folding  
246 pattern of RNA secondary structure in the mutated 5'UTR, synonymous leader (T445C) and  
247 NSP3 regions (C3037T). The structure of complete mutant 5'UTR (variant 'T') was  
248 compared with the wild type (variant 'C') secondary pattern as mentioned in the Huston, et  
249 al. <sup>53</sup>. Since the wild type (variant 'C' at 318<sup>th</sup> nucleotide) RNA structure of the NSP3 was not  
250 available in the literature, we generated the structure of mutant (variant 'T') to predict the  
251 RNA folding in the Mfold web server. From the Mfold web server, we also estimated free  
252 energy change ( $\Delta G$ ) for wild and mutant NSP3 RNA fold.

### 253 3. RESULTS AND DISCUSSION

254 We represented the global scenario of SARS-CoV-2 infection by the G, GH, GR, and GV  
255 clade strains and estimated the association between the clade strains and death-case ratio.  
256 Afterwards, the possible effects of the nine mutations in S, RdRp, ORF3a, N, 5'UTR, leader  
257 protein, and NSP3 were discussed with associated results. Whereas researches on molecular  
258 docking of the spike protein <sup>54,55</sup> and RdRp <sup>56,57</sup> in search of potential drug targets is a  
259 continuous process, our study approached in a unique way to dock spike with elastase-2 and  
260 RdRp with NSP8 to satisfy our purpose. The overall epistatic interactions of the mutant  
261 proteins and/or RNA was then depicted (Figure 1) with appropriate explanation. Finally, we  
262 endeavored to postulate using theoretical evolutionary theory how the virus might be  
263 changing virulence and fitness.

#### 264 3.1 Global Emergence of Dominant Co-occurring Mutations

265 Analysis of the SARS-CoV-2 genome sequences has indicated that 241C > T, 3037C > T,  
266 14408C > T, and 23403A > G mutations were discretely identified among different viruses in  
267 China on 24<sup>th</sup> January of 2020. These four mutations together in a single virus was first  
268 detected in England on 3<sup>rd</sup> February 2020 (Table 1). Since then, those mutations were found  
269 to cooccur with other mutations, thus formed clade G, GH, GR, and GV, and have become  
270 the most dominant variants in other regions of the world (Figure 2b), for example, escalating  
271 to 85% in May 2020 in Southeast Asia <sup>20</sup>. The G clade strain circulated predominantly (30%,  
272 n=828) in Africa, whereas the GH, GR, and GV clades have become more recognized in the  
273 Americas, Western Pacific and Europe, respectively (Table 1).

274 Our weekly based time-plot has depicted a gradual increase of G, GH, and GR viruses  
275 altogether since the 10<sup>th</sup> week (24 February – 2 March 2020) recording a sudden jump to 42%  
276 in that week from a mere 12% of the previous week. The global COVID-19 cases  
277 exponentially increased from the 10<sup>th</sup> week with only 7,806 cases and infected almost

278 500,000 people with ca. 35,000 deaths in just seven weeks while the G, GH, and GR strains  
279 reached 80% (supplementary table S1). The death rate elevated at its peak (14%) in mid of  
280 March (week 12) and gradually decreased to below 2% in early September. Correspondingly,  
281 the number of GR strains is increasing from the 10<sup>th</sup> week to 32<sup>nd</sup> week with a small  
282 fluctuation where the G and GH strains each maintained a static ratio between ~20-30%. GV  
283 clade strains initiated into the population from 30<sup>th</sup> week and became most dominant strain  
284 replacing GR clade strains in just 9 weeks (Figure 2a).

285 The geographical distribution plot of the G, GH, GR, and GV clades with infection and  
286 death-cases delineates that the new infections began to rise exponentially with the increase of  
287 coevolved mutant variants in all regions except the West Pacific area (Figure 2b). The West  
288 Pacific region, which includes East Asian countries as well, identified a very low number of  
289 infection cases and deaths per million (Figure 2b). Europe and America have a high rate of  
290 infections as well as a high percentage of those variants. The reason may be linked with  $\alpha$ 1-  
291 antitrypsin (AAT) deficiency, which is very rare in East Asia unlike Europe and North  
292 America<sup>58</sup>. The AAT allele deficiency facilitates entry of the 614G subtype into the host  
293 cells and accelerates the spread of G, GH, GR, and GV clades. Our analysis has also found  
294 that the proportion of strains containing 23403A > G mutation was 25% in East Asia and  
295 >75% in Europe and America in first 6 months of this year (data not shown).

296 The death-case ratio was decreasing globally while the GR mutants were increasing until  
297 August (Figure 2a). Since September, GV clade strains were increasing while the death-case  
298 ratio remained low (2%). To examine the association between clade strains and death-case  
299 ratio, both unadjusted and adjusted incidence risk ratio were estimated. In the adjusted model,  
300 G, GR, and GV clades were found to be significantly associated with death-case ratio in both  
301 models. If G clade strains increase by one percentage point then death-case ratio would be  
302 expected to increase by a factor of 1.03, while holding all other variables in the model  
303 constant (IRR = 1.03, 95% CI 1.01 – 1.06). However, GR and GV clades were inversely  
304 related with death-case ratio. One percentage point increment in GR clade led to reduction to  
305 death-case ratio by a factor of 0.99, while holding all other variables in the model constant  
306 (IRR = 0.98, 95% CI 0.97 – 0.99). And then again, If GV clade strains increase by one  
307 percentage point then death-case ratio would be expected to decrease by a factor of 0.97,  
308 while holding all other variables in the model constant (IRR = 0.97, 95% CI 0.96 – 0.98).

309 Like other SARS-CoV-2 studies<sup>59-61</sup>, this statistical analysis also suffers from some  
310 limitations in dealing with genomic and calculating death-case ratio data. The death-case  
311 ratio is believed to be underestimated because of the inadequate number of tests capacity and

312 asymptomatic SARS-CoV-2 cases in the general population. Moreover, fewer mutation  
313 patterns are uploaded from underdeveloped or developing countries like African and Sub-  
314 Saharan countries which might lead to spatial biasedness in the analysis. Therefore, the  
315 global epidemiological scenario of different clades was explored to mitigate this problem.

316 Regional monthly data depicted a similar increase of GR and GV strains while the death  
317 ratio was decreasing in studied regions with some rare exceptions. In Europe, GR strains  
318 were predominant from April to August, while GV strains became predominant from  
319 September. In the Americas a high abundance (over 50%) of GH clade strains was found  
320 from March to December. In Eastern Mediterranean, Africa and Southeast Asian region there  
321 was an increased rise of GR strains in May, while in Western Pacific region GR strains  
322 became predominant in June. The increase of G strains and the death-case ratio at the same  
323 time was observed in most regions, except Eastern Mediterranean and Southeast Asia, where  
324 a limited number of sequence data were produced. (Figure 2b).

325 Researchers around the globe are now trying to explore the factors associated with  
326 variable mortality rates due to the infection by SARS-CoV2 in different regions of the world.  
327 A recent report identified a Neanderthal-derived haplotype in chromosome 3 which is  
328 prevalent in South Asia as a substantial contributor to COVID-19 risk for hospitalized  
329 patients along with other risk factors <sup>62</sup>. Also, a haplotype inherited from Neandertals on  
330 chromosome 12 was found at ~25 to 30% in Eurasia and the Americas, can reduce relative  
331 risk of becoming severely ill with COVID-19 by ~22% <sup>63</sup>. But other reports say that  
332 mortality associated to COVID-19 in Indian and south Asian subcontinent is lower than in the  
333 west <sup>64</sup>. In-hospital mortality was also found to be considerably lower in Asia than Europe  
334 and America <sup>65</sup>. Several factors such as the virulence of the pathogen, host factors like innate  
335 immunity, genetic diversity in immune responses, epigenetic factors, genetic polymorphisms  
336 of ACE2 receptors, micro RNAs and universal BCG vaccination, along with environmental  
337 factors may have contributed in low mortality in Indian region <sup>66</sup>. In European countries,  
338 mortality rates were observed to vary from region to region <sup>67</sup>. In Africa, where the  
339 Neanderthal risk haplotype is almost absent, youthful population, and weather conditions  
340 might have also contributed to low morbidity and mortality of COVID-19 <sup>68</sup>. No association  
341 between the SARS-CoV-2 variants and mortality rates was observed in the Eastern  
342 Mediterranean Region <sup>69</sup>. However, another report showed that, GR, GH and L clade viruses  
343 are predominant in countries with higher deaths and GR clade showed higher prevalence  
344 among severe/deceased patient <sup>70</sup>. Besides these host, pathogen and environment associated

345 factors, human and social intervention like political decision making, scientific advice, and  
346 health system and public health capacity can also contribute to variable COVID-19 mortality  
347 rates in different regions of the world <sup>71</sup>.

### 348 **3.2 S Protein D614G Mutation Favors Elastase-2 Binding**

349 Korber et al. (2020) linked the S:p.D614G mutation with viral spread or transmission  
350 capacity rather than virus infectivity or virulence [17] whereas Becerra Flores et al. (2020)  
351 approached to demonstrate a potential link of D614G with virus pathogenicity [22], using  
352 same data and method alike Korber et al. (2020). A preview published by Grubaugh et al.  
353 (2020) stated those major points as unclear without any concrete interpretations, and  
354 questioned on the correlation of D614G mutation with virus spread or transmissibility.  
355 Dearlove et al. (2020) acknowledged that this 614G variant may constitute an exception to  
356 their conclusion on the arising of other mutations of the virus due to genetic drift <sup>72</sup>. Rausch  
357 et al. (2020) <sup>73</sup> also stressed upon the possible effect of D614G on viral fitness through  
358 revisiting the points raised by Dearlove et al. (2020). Recently, Plante et al. (2020) <sup>74</sup> and Hou  
359 et al. (2020) <sup>75</sup> reported that D614G mutation alters virus fitness by enhancing viral load in  
360 COVID-19 patients and may increase transmission in human, which was speculated from the  
361 increasing transmission of mutant-type viruses in hamsters.

362 S: p.D614G mutation may facilitate the exposure of the cleavage domains of S1-S2  
363 and S2' to proteases, elastase-2, Furin, or TMPRSS2, as discussed by Easwarkhanth, et al. <sup>76</sup>.  
364 Another explanation of the more efficient cellular entry for D614G variant is the possibly  
365 breakage of hydrogen bonds that modulates the interactions between S protein protomers and  
366 ACE2 receptor binding <sup>17,75,77</sup>. Moreover, G614 mutation may increase S protein stability and  
367 participate in N-linked glycosylation at N616 <sup>41</sup>. Several recent experiments have suggested  
368 that mutated (G<sub>614</sub>) protein contains a novel serine protease cleavage site at 615-616 that is  
369 cleaved by host elastase-2, a potent neutrophil elastase playing important roles in  
370 inflammatory diseases of human, more efficiently than wild protein, D<sub>614</sub>  
371 <sup>25,41,58,78</sup>. Bhattacharyya et al. (2020) hypothesized that the neutrophil elastase level at the site  
372 of infection will facilitate the host cell entry for G<sub>614</sub>. We explained here, with the aid of  
373 structural bioinformatics, how the mutated protein gets the advantage over wild type with a  
374 single mutation.

375 This study found interesting structural features of the S protein while comparing and  
376 superimposing the wild (D<sub>614</sub>) over mutant (G<sub>614</sub>). The secondary structure prediction and

377 surface accessibility analyses showed that there was a slight mismatch at the S1-S2 junction  
378 (<sup>681</sup>PRRAR↓S<sup>686</sup>) where serine at 686 (S<sup>686</sup>) was found covered in G<sub>614</sub> and exposed to the  
379 surface in D<sub>614</sub>. However, S<sup>686</sup> in both G<sub>614</sub> and D<sub>614</sub> were exposed to an open-loop region to  
380 have possible contact with the proteases (supplementary Figure S1). Further investigation on  
381 the aligned 3D structures showed no conformational change at the Furin or TMPRSS2  
382 cleavage site (Figure 3c). We observed no structural variation in the surrounding residues of  
383 the protease-targeting S1-S2 site (Figure 3c), which eliminated the assumption of Phan<sup>79</sup>.  
384 The predictive 3D models and structural assessment of D<sub>614</sub> and G<sub>614</sub> variants also confirmed  
385 that the cleavage site at 815-16 of S2 subunit (<sup>812</sup>PSKR↓S<sup>816</sup>) or S2'<sup>3,80</sup> had no structural and  
386 surface topological variation (Figure 3d-e). Rather, the superimposed 3D structures suggested  
387 a conformational change in the immediate downstream region (<sup>618</sup>TEVPVAIHADQLTPT<sup>632</sup>)  
388 of the 614<sup>th</sup> position of G<sub>614</sub> that was not observed in D<sub>614</sub> variants (Figure 3a-b).

389 The elastase-2 restrictedly cut valine at 615, due to its valine-dependent constriction  
390 of catalytic groove<sup>81</sup>. The present sequence setting surrounding of G<sub>614</sub> (P6-  
391 <sup>610</sup>VLYQGV↓NCTEV<sup>620</sup>-P'5) showed a higher enzymatic activity over the D<sub>614</sub>, which  
392 cannot be completely aligned with previous works on the sequence-based substrate  
393 specificity of elastase-2<sup>82</sup>. However, the first misaligned residue of the superimposed G<sub>614</sub>,  
394 located at the P'4 position (T<sup>618</sup>), may also be important for binding with the elastase-2, and  
395 further down the threonine (T) at 618, the residues may affect the bonding with the respective  
396 amino acids of the protease. This changed conformation at the downstream binding site of  
397 G<sub>614</sub> may help overcome unfavorable adjacent sequence motifs in the mutated S protein as the  
398 elastase-2 substrate. Therefore, the simultaneous and/or sequential processing of the mutated  
399 S protein by TMPRSS2/Furin/Cathepsin and elastase-2 facilitates a more efficient SARS-  
400 CoV-2 entry into the host cells and cell-cell fusion<sup>41,58,78</sup>.

401 This study further observed the possible association of the S protein with elastase-2  
402 and found an increased binding affinity in case of G<sub>614</sub> (Table 3). Hence, the active sites of  
403 the mutated protein interacted efficiently with more amino acids of elastase-2 (Table 4),  
404 possibly providing a better catalytic activity as shown by Hu, et al.<sup>41</sup>. The mutation may have  
405 changed the structural configuration of the elastase-2 cleavage site in a way that the enzyme  
406 is facing less challenge to get near to the cutting site of the altered protein (Figure 3a-b and  
407 4). The efficient cleaving of this enzyme, although located in an upstream position of the S1-  
408 S2 junction, may assist in releasing S1 from S2 and change the conformation in a way to get  
409 later cleaved at the S2' site, and then help in the fusion process<sup>83,84</sup>. Mutated spike protein

410 and elastase-2 complex was more flexible than the wild one, and the interactions with  
411 enzyme was also different as shown in RMSD deviation between the complexes (Figure 5).

412 Besides, this G<sup>614</sup> amino acid replacement may have a destabilization effect on the  
413 overall protein structure (Table 4 and Figure 3a-b). The deformed flexible region at or near  
414 G<sup>614</sup> is the proof of that destabilizing change (Figure 3f and supplementary figure S3). Zhang  
415 et al.<sup>85</sup> explained less S1 shedding through more stable hydrogen bonding between Q<sup>613</sup>  
416 (glutamine) and T<sup>859</sup> (threonine) of protomer due to greater backbone flexibility provided by  
417 G<sup>614</sup>. On the other hand, increasing the number of RBD up conformation or increasing the  
418 chance of 1-RBD-up conformation due to breakage of both intra-and inter-protomer  
419 interactions of the spike trimer and symmetric conformation will give a better chance to bind  
420 with ACE2 receptor and can also increase antibody-mediated neutralization<sup>86</sup>. The S1 will  
421 release from S2 more effectively in G614 protein due to introduction of glycine that will  
422 break hydrogen bond in between the D614 and the neighboring protomer T859 amino acid  
423<sup>86,87</sup>. Our analyses have provided the *in silico* proof of this point by showing that the mutated  
424 protein was less stable than the wild type protein by missing a hydrophobic interaction with  
425 Phe<sup>592</sup> (Figure 3g-h). This new result accorded well with the later consensus as explained in  
426 Weismann et al. (2020) that G614 will increase its overall flexibility. Therefore, the overall  
427 structural change may assist the mutated S protein by providing elastase-2 a better binding  
428 space and attachment opportunity onto the cleavage site, thus providing a more stable  
429 interaction with the S2 domain that increases the credibility of an efficient infection (Figure  
430 1).

### 431 **3.3 Increased Flexibility of RdRp-NSP8 Complex: Compromise Proof-Reading** 432 **Efficiency with Replication Speed**

433 The binding free energy ( $\Delta G$ ) of the RdRp-NSP8 complexes have been predicted as -  
434 10.6 and -10.5 Kcalmol<sup>-1</sup>, respectively, in wild (P<sub>323</sub>) and mutant (L<sub>323</sub>) type that suggests less  
435 strong interaction for mutant protein (Table 4). The number of contacts made at the interface  
436 (IC) per property and interacting amino acids increased between L<sub>323</sub> and NSP8 (Table 3 and  
437 4). This increasing contacts due to higher hydrogen bonds (Figure 5d) made the complex of  
438 mutated RdRp and NSP8 less flexible. Our analyses have identified that proline (P<sup>323</sup>) or  
439 leucine (L<sup>323</sup>) of RdRp can interact with the aspartic acid (D<sup>112</sup>), cysteine (C<sup>114</sup>), valine (V<sup>115</sup>),  
440 and proline (P<sup>116</sup>) of NSP8 (Figure 6). RdRp binds with NSP8 in its interface domain  
441 (residues alanine:A<sup>250</sup> to arginine:R<sup>365</sup>), forming positively charged 'sliding poles' for RNA

442 exit and enhance the replication speed probably by extending the RNA-binding surface on  
443 NSP8<sup>88,89</sup>. Molecular dynamics of the mutated RdRp-NSP8 complex supported this by  
444 showing a more expanded surface area in interacting sites (Figure 5b) and maintained  
445 integrity throughout the simulation (Figure 5c). Another study reported that the NSP8 binding  
446 sites on RdRp and the RNA exit tunnel were comparatively neutral and conserved<sup>90</sup>. Besides,  
447 a zinc ion in the conserved metal-binding motif (H<sup>295</sup>, C<sup>301</sup>, C<sup>306</sup>, and C<sup>310</sup>), close to the 323  
448 residue, is responsible for maintaining the integrity of the RdRp architecture<sup>90,91</sup>. We did not  
449 find any interaction of NSP8 with the zinc-binding residues of RdRp proteins (Table 3 and  
450 Figure 6). Therefore, the P323L mutation within this conserved site of the RdRp interface  
451 domain may only affect the RdRp-NSP8 interaction without changing metal binding affinity.

452 Recent reports on structural analyses revealed that the RdRp:p.P323L led to the  
453 stabilization of the protein structure<sup>92,93</sup>. The results from the six state-of-the-art tools used in  
454 this study have suggested that mutant (L<sub>323</sub>) protein cannot be concluded as 'stable' from the  
455 ambiguous  $\Delta\Delta G$  values (Table 4), rather the interaction with the adjacent amino acid<sup>94</sup>  
456 mainly defined the stability. Although the hydrophobic amino acid (L<sup>323</sup>) embedded in the  
457 L<sub>323</sub> protein, our secondary structure analysis indicated the presence of only loop structure in  
458 323 position for both wild and mutant types (Figure S1). However, Chand et al. (2020)  
459 reported the turn structures of 323 and 324 shifted into five sheets at positions 321, 322, 323,  
460 324 and 327 to bury leucine. The superimposed 3D structures solved this contradiction about  
461 secondary structure by showing that there was no deviation in loop/turn structure of mutant  
462 protein (supplementary Figure S4).

463 Overall, the mutation at 323 position, to some extent, stabilized the L<sub>323</sub> structure,  
464 made the protein more rigid, binds less strongly with the NSP8, and thus expanded the  
465 interacting region with NSP8. These variations may together increase the replication speed by  
466 exiting the processed RNA genome from the RdRp groove structure more swiftly (Figure 1).  
467 The increasing replication speed might be due to the perturbation of interaction between  
468 RdRp and NSP8<sup>88,94</sup>, or less possibly, the complex tripartite interactions (RdRp, NSP8, and  
469 NSP14) responsible for the speculated decrease of proof-reading efficiency<sup>6</sup>. Thus, RdRp  
470 mutants might increase the mutation rate by a trade-off between high replication speed and  
471 low fidelity of the mutant polymerase<sup>95</sup>. Another possibility could be the lower proof-reading  
472 efficiency of NSP14 that was not linked to the replication speed<sup>6</sup>. Analysis of our study  
473 sequences revealed that the frequency of mutation (median=8) in L<sub>323</sub> mutants (n=27,364) is  
474 significantly higher (p<0.0001) than the frequency (median=6) of wild-type (P<sub>323</sub>) strains

475 (n=9,815). This increased mutation rate may play a vital role in genetic drifts and provide  
476 next generations a better adaptation to adverse environments.

### 477 **3.4 Q57H Substitution in ORF3a Viroporin: the Roles of Decreased Ion Permeability**

478 This study has found that the replacement of glutamine (Q<sup>57</sup>) with positively charged  
479 histidine (H<sup>57</sup>) at 57 position of ORF3a transmembrane region 1 (TM1) does not change  
480 secondary transmembrane helical configuration (supplementary Figure S1), and aligned 3D  
481 structures have also shown no variation of TM1 in the monomeric state (Figure 7a). The  
482 mutant (H<sub>57</sub>) protein has a non-significant increase in structural stabilization and a minimal  
483 decrease in molecular flexibility (Table 4 and supplementary Figure S5). This is because of  
484 the weak ionic interaction of C<sub>α</sub> with the sulfur atom of cysteine (C<sup>81</sup>) in TM2 and hydrogen  
485 bond of terminal N<sub>ε</sub> of lysine (61K) with one of the endocyclic nitrogens of H<sup>57</sup> (Figure 7b).

486 Selection analysis predicted the accumulation of those mutations as a result of  
487 pervasive positive selection with an increasing trend <sup>96</sup>. One possibility of this positive  
488 selection of histidine over glutamine might be the role of H<sup>57</sup> (TM1) in increasing  
489 constrictions wherein the diagonal C<sup>81</sup> (TM2) may assist through the ionic interaction (Figure  
490 7b). Notably, the Q<sup>57</sup> in wild-type protein forms the major hydrophilic constriction within the  
491 ORF3a channel pore <sup>97</sup>. Thus, further favorable increasing constrictions within the H<sub>57</sub> protein  
492 channel pore and the replacement of charge-neutral Q with a positive-charged H in the  
493 selectivity filter may reduce the passing of positive ions such as Ca<sup>2+</sup>, Na<sup>+</sup>, and K<sup>+</sup> by either  
494 electrostatic repulsion or blocking <sup>98-101</sup>. This speculation for ORF3a mutant protein was  
495 supported by another study that showed the reduction of ion permeability of Na<sup>2+</sup> and Ca<sup>2+</sup>  
496 through the H<sub>57</sub>, however, that decrease was not found statistically significant (p>0.05) <sup>97</sup>.

497 The decrease intracellular concentration of cytoplasmic Ca<sup>2+</sup> ions potentially reduces  
498 caspase-dependent apoptosis of the host cell <sup>102</sup>, mainly supporting viral spread without  
499 affecting replication <sup>23</sup> as shown in Figure 1. Moreover, the ORF3a can drive necrotic cell  
500 death <sup>103</sup> wherein the permeated ions <sup>104</sup> and the insertion of ORF3a viroporin into lysosome  
501 <sup>105</sup> play vital roles. The H<sub>57</sub> mutant may thus decrease pathogenicity and symptoms during the  
502 early stages of the infection, i.e., reducing ‘cytokine storm’ in the host <sup>106</sup>. Besides, ORF3a  
503 was proved to affect inflammasome activation, viral release, and cell death, as shown by  
504 Castaño-Rodríguez, et al. <sup>107</sup> that the deletion of ORF3a reduced viral load and morbidity in  
505 animal models.



506 Even though similar proteins of ORF3a have been identified in the sarbecovirus  
507 lineage infecting bats, pangolins, and humans<sup>108</sup>, only one pangolin derived strain from 2017  
508 in Guangxi, China contains H<sup>57</sup> residue as shown by our mutation analyses (supplementary  
509 Figure S6) and also reported by Kern, et al.<sup>97</sup>. However, bat or civet did not contain this  
510 mutation in TM1 and the flanking vicinity was not identical; whereas, the TM1  
511 (<sup>41</sup>LPGWLIVGVALLAVFQSASKII<sup>63</sup>) does not have amino acid replacements for the  
512 strains of SARS-CoV-2 and pangolin-coronaviruses (Figure S5a-b). The presence of this  
513 mutation in pangolin could be an accidental case or might explain its impact on modulating  
514 host-specific immune response, which needs functional experimental verification. A possible  
515 explanation behind that presence might be the more accustomed nature of the virus towards  
516 reverse transmission by being less virulent, i.e., from human to other animals, as observed in  
517 recent reports<sup>109,110</sup>.

### 518 **3.5 N Protein Mutation: Augmenting Nucleocapsid Stability and Exerting** 519 **Miscellaneous Effects**

520 Our study has observed that the combined mutation (N: p.RG203-204KR) causes no  
521 conformational change in secondary and 3D structures (Figure S1 and Figure 8, respectively)  
522 of the conserved SR-rich region of the LKR (supplementary Figure S7), but there is a minor  
523 alteration in the degree of buried or exposed site (Figure 3). This result contradicted the  
524 prediction of<sup>111</sup> about the change in the length and arrangements of the alpha-helix in the SR-  
525 rich region. The superimposed 3D structures showed structural deviation, rather at  
526 <sup>231</sup>ESKMSGKGQQQGGQTVT<sup>247</sup> of the LKR (Figure 9), corresponding to the high  
527 destabilization of the KR<sub>203-204</sub> protein (Table 3). On the other hand, A220V mutation in the  
528 N protein of the GV clade showed a slightly more stable formation of the mutated N protein  
529 with no change in the chemical properties (Table 4), that might affect RNA binding affinity  
530<sup>112</sup>.

531 Impedance to form particular SR-motif due to RG→KR mutation might disrupt the  
532 phosphorylation catalyzed by host glycogen synthase kinase-3<sup>113</sup>. Similar hypo-  
533 phosphorylation events could arise due to the conversion of serine to nonpolar or neutral  
534 amino acids (L<sup>188/194/197</sup>, I<sup>193</sup>, and N<sup>202</sup>), as represented in supplementary Table S2 and<sup>114</sup>.  
535 Consequently, the low phosphorylation level after entering into the cell should unwind the  
536 viral ribonucleoprotein (RNP) in a slower but more organized fashion that might have an  
537 impact upon translation and immune-modulation<sup>115-117</sup>. In KR<sub>203-204</sub>, replacement of a glycine  
538 with lysine that may increase the nucleocapsid (N protein- RNA complex) stability by

539 forming stronger electrostatic and ionic interactions due to increased positive charge<sup>118,119</sup>.  
540 Besides, the more disordered orientation of the associated LKR<sup>115</sup> and highly destabilizing  
541 property of KR<sub>203-204</sub> may assist in the packaging of a stable RNP<sup>112,120</sup>. These interactions  
542 and impact upon mutations are depicted in Figure 1.

543 N protein also utilizes the dynamic nature of the intrinsically disordered linker region  
544 (LKR) that controls its affinity towards M protein, self-monomer, 5'UTR, and cellular  
545 proteins<sup>121-123</sup>. The phosphorylation at the LKR site may play an essential role to regulate  
546 these interactions<sup>118</sup>. It was speculated that KR<sup>203-204</sup> attained more selective advantage<sup>96</sup>  
547 over the other mutations of N protein (Table S2), probably because of stronger RNA binding  
548 and synchronized hypo-phosphorylation.

### 549 **3.6 Silent Mutations may not be Silent**

550 The C241T of 5'UTR (untranslated region), a single nucleotide change, or 'silent'  
551 mutation, located at the UUCGU pentaloop part of the stem-loop region (SLR5B) has a  
552 potential role in viral packaging<sup>124</sup>. This pentaloop of 5'UTR remains unchanged and  
553 maintains a particular structure<sup>122,125</sup>. The RNA secondary structural analysis in our study  
554 predicted that there is no change in the 241T structure (supplementary Figure S8a). However,  
555 the silent mutation in the loop region upstream to the ORF1a start codon (266-268 position)  
556 may be involved in differential RNA binding affinity to the ribosome and translational factors  
557<sup>126</sup>.

558 In the case of multi-domain NSP3 (papain-like protease), we have observed superior  
559 stability of the RNA after gaining of the synonymous mutation 3037C<T (C318T) where  
560 wild and mutant RNA structure has -151.63 and -153.03 Kcal/mol, respectively  
561 (Supplementary Figure S8b-c). A more stable secondary structure of (+)-ssRNA as observed  
562 in the mutant NSP3 protein corresponds to the slower translational elongation. It contributes  
563 to a range of abnormalities resulting in low translation efficiency, which affects  
564 posttranslational modifications as a part of protein regulation<sup>127</sup>. Because silent mutations  
565 have an impact on the ribosome occupancy time depending on the structural modification and  
566 mRNA stability which guide co-translational folding kinetics of a protein<sup>127</sup>. This silent  
567 mutation is located within the flexible loop of the NSP3 ubiquitin-like domain 1 (Ubl1). In  
568 SARS-CoV, Ubl1 was reported to bind with single-stranded RNA containing AUA patterns  
569 and interact with the nucleocapsid (N) protein<sup>128,129</sup>. Besides, Ubl1 was likely to bind with  
570 several signature repeats in 5'-UTR in SARS-CoV-2 genome<sup>130</sup>. Figure 1 represents the  
571 overall possible scenario due to these silent mutations.

572 Change in T445C in leader protein may not cause any change in expression or others  
573 since the structure and energy are same -172.34 kcal/mol. The change C6286T is at between  
574 in the NSP3 region whereas the C26801G is in between the Nucleic acid-binding (NAB)  
575 domain and betacoronavirus specific marker ( $\beta$ SM) domain. The change C26801G is in the  
576 TM3 of virion membrane.

### 577 **3.7 Epistatic Effects of Co-occurring Mutations: Increasing Viral Fitness Costing** 578 **Virulence?**

579 The co-occurring mutations, as defined by the presence of simultaneous multi-site  
580 variations in the same or different proteins or in the genome [115], have provided new  
581 insights into the dynamic epistatic network by employing differential molecular interactions.  
582 The synergistic effects of the mutations were reported to control viral fitness and virulence,  
583 as observed in Influenza and Ebola virus outbreak<sup>131-136</sup>. For instance, the detrimental effect  
584 of R384G on influenza A fitness was overcome by the co-occurring mutation E375G<sup>132,135</sup>,  
585 and co-occurring mutations at the antigenic sites of influenza hemagglutinin can also drive  
586 viral evolution<sup>134,136</sup>. The correlation of the co-occurring GP-L mutations affect Ebola virus  
587 virulence and thus case fatality rate<sup>133</sup>. The viral fitness determined by the efficiency of  
588 viruses to spread throughout the population and infect more new victims<sup>137,138</sup>. A general  
589 definition of virulence as proposed by Geoghegan et al. (2018) is ‘the harm caused by  
590 pathogen infection, particularly in terms of host morbidity and mortality’<sup>139</sup>. Evolution  
591 generally drives a pathogen to gain more fitness while reducing the virulence<sup>139</sup> during the  
592 natural course of mutations<sup>140</sup>; nevertheless, there is contradiction between short-term<sup>140</sup> and  
593 long-term evolution<sup>139</sup> of virus. However, the virulence can also increase during the course  
594 of the outbreak as observed in HIV in 2002<sup>141</sup>. Here we used death-case ratio and the  
595 number of infection cases as equivalent to virulence and fitness, respectively.

596 Between two important G clade-featured co-occurring mutations, the p:D614G of the  
597 S protein and p:P323L of RdRp, we observed no interlinked functional relationship (Figure  
598 1). The former assists mainly by more rapid entering into the host cells with an efficient  
599 elastase-2 activity and higher aggressiveness of G<sub>614</sub> mutant is related to elastase-2 or human  
600 neutrophil elastase (hNE) concentration during inflammation<sup>142</sup>. Besides, higher levels of  
601 functional S protein observed in G<sub>614</sub> strains can increase the chance of host-to-host  
602 transmission<sup>85</sup>. The later one may boost up the replication by a faster RNA processing  
603 (exiting) that can open up the avenue to generate strains with significantly ( $p < 0.0001$ ) higher  
604 number of mutations. This increased mutation rate in L<sub>323</sub> mutants can surpass the constant

605 proof-reading fidelity<sup>143</sup>, with an average of ~8 (range 0-45) mutations per strain (n=37,179),  
606 and evolve a greater number of variants in a population (Figure 1). Nevertheless, SARS-  
607 CoV-2 has still low genetic diversity, and these mutations mostly are the product of genetic  
608 drift with no or unknown effect on virus virulence and fitness [53, 54], and without  
609 possessing a deleterious effect on viral fitness, a mutation fixed early on in the epidemic is  
610 unlikely to be lost.

611 The S protein and RdRp mutations, albeit seemingly unrelated, can cumulatively  
612 escalate the infectiousness of the virus as a result of higher viral load and shorter burst time.  
613 This rapid within-host replication might be directly correlated with the virulence, in turn,  
614 morbidity and mortality rate<sup>144</sup>. This study also showed that co-occurring mutations, by  
615 acting together, may benefit viral populations by incrementing the ability to produce a diverse  
616 viral population (Figure 1), that might be able to adapt more quickly in adverse climatic  
617 condition, evade the immune response, and survive within different selective pressure<sup>145,146</sup>.  
618 The S protein mutation is also related to human allelic variation<sup>58</sup>, and may get an advantage  
619 in particular populations.

620 NSP3 is a scaffolding protein for the replication-transcription complex, and the  
621 possible change in its structure may affect the overall dynamics of viral replication<sup>128,129</sup>.  
622 P323L mutation of RdRp may change binding affinity to the Ubl1 region of NSP3<sup>147</sup> (Figure  
623 1). The p.C241T mutation, on its own, may affect the transcription and viral packaging,  
624 although we have not found any possible association of it with the S, RdRp, and NSP3  
625 mutant proteins.

626 The mutant N protein may have an impact on viral replication and transcription, like  
627 other coronaviruses<sup>123</sup>, through the binding with NSP3 protein that is linked to RdRp  
628 centered replication complex. This N protein can affect the membrane stability by yet  
629 uncharacterized interaction with the M protein, which should ultimately produce more stable  
630 virion particles<sup>148-150</sup>. A stronger N protein-RNA complex provokes slower intracellular  
631 immune response<sup>116</sup>, and at the same time, can remain highly contagious and aggressive  
632 because of the concurrent presence of G clade-featured S protein and RdRp mutations (Figure  
633 1). In the case of mutant ORF3a protein, we have not found any report that correlates with  
634 other co-occurring mutations. H<sub>57</sub> mutant, possibly linked to the mild or asymptomatic cases,  
635 may allow the silent transmission and increase the chance of viral spread by lowering the

636 activation of inflammatory response (Figure 1), such as reduced viral particle release and  
637 cytokine storm<sup>23,151,152</sup>.

638 The fittest viral strains will dominate in a population considering other selective  
639 parameters associated with the virulence<sup>139,144</sup>. Public health interventions were able to  
640 create a selective pressure to make a strain less virulent and highly competitive<sup>153,154</sup>, which  
641 might increase the chance of viral transmission<sup>155</sup>; however, there was also argument against  
642 this established theory<sup>156</sup>. The SARS-CoV-2 with multiple clades and variants needs to be  
643 more efficient to maintain the delicate evolutionary trade-off between fitness and virulence.  
644 A recent publication on COVID-19 demonstrated a reduced viral load in the upper respiratory  
645 system for a particular genotype<sup>157</sup>, which may in turn influence viral transmission and  
646 spread. We proposed here a hypothesis (model) on SARS-CoV-2 infection as to how the  
647 fitness of the major clade strains might cost virulence.

648 The presence of mostly G strains in the early pandemic period (starting weeks of  
649 March) might be linked to a higher mortality rate (Figure 2a). G strains were continuously  
650 present in any region at a particular level (~20% among these clades), which could be the  
651 reason for maintaining a balanced high mortality rate. This stage of the pandemic might be  
652 linked to the initial lack of awareness, hygienic practice, and social distancing that led to a  
653 large number of transmissions. The high viral load and quick immune response will spread  
654 the G strains more efficiently in a crowded area as shown in the case of Africa (Figure 1)  
655 where the lockdown and other social interventions were not very strict<sup>158</sup>. The G strains thus  
656 spread unprecedentedly from Europe to the other parts of the world. Being more  
657 transmissible alone can also cause problem by putting a greater strain on hospitals and  
658 leading to a sharper spike in deaths.

659 The GH strains were mainly restricted to the USA and partly Eastern Mediterranean  
660 (Fig. 1), and mostly spread by cryptic<sup>159</sup> and pre/a-symptomatic transmission<sup>160</sup>. These  
661 variants might trade-off virulence by a slower release of virions, and in exchange, benefited  
662 from the induction of low immune response in asymptomatic hosts. They were more fit at  
663 that time, in theory, when the people were dealing with the pandemic in panic. The GH type  
664 might be able to maximize their transmission by residing within the host unknowingly and  
665 spread at ease. We can not nullify that there could be no significant link of the mutation with  
666 virulence or death-case ratio since the effect of ORF3a was not found significant in wet lab  
667 experiment and in our statistical analysis as well.

668           The GR strains possibly attained an advantage over G and GH by a more orchestrated,  
669 delicately balanced synergistic effects on replication and transmission fitness. These epistatic  
670 effects could have increased the fitness by hiding the virus from immunity and increasing  
671 stability in the environment, i.e., more transmissible through air and surface. The  
672 asymptomatic patient infected with GR strains, similar to GH, would have a weaker immune  
673 response and shed the virus for a longer period <sup>152</sup>. Hamed et al. (2020) <sup>70</sup> reported a result  
674 against this hypothesis with a statistical approach using GISAID data; however only 4.75%  
675 (27,608/ 581,120 on February 20, 2021) sequence data contains patient status, that will  
676 definitely misinterpret true scenario.

677           GV strains featuring an A222V mutation in the S protein with other mutations of the  
678 clade G was reported to have a less pronounced effect due to its structural position and have  
679 no role in antibody binding, thus founder effect might be the cause of its spreading within  
680 Europe and the age group bias towards young adults <sup>24</sup>. There was hence probably no effect  
681 of the mutations on the viral transmission, severity, and escaping antibody <sup>24,161</sup>, rather  
682 superspreading events after lifting up of travel restriction in Europe and lack of effective  
683 containment could be the main factors for the rapid spread and establishment of this clade.  
684 There was, however, speculation about the effect of this mutation on immunogenicity since  
685 computational analysis predicted its location within T-cell target region <sup>162,163</sup>. A plausible  
686 link of the mutation with viral re-infection in some patients was of prime concern and  
687 demands further study <sup>164</sup>. How the more stabilized linker region of the mutated N protein  
688 due to A220V mutation might give an edge for the GV strains in terms of association with  
689 lower death-case ratio but seemingly higher infection number by interacting with RNA is a  
690 question for further study. Together, the mutations of GV strains can affect in an unknown  
691 way in transmission and spread that cannot be captured alone in terms of spike A222V  
692 mutation.

693           Lineage B.1.1.7, a variant under GR clade, consists of 17 mutations (14  
694 nonsynonymous and 3 deletions) in spike, N, ORF1ab, and ORF8 proteins, as well as, 6  
695 silent mutations <sup>165,166</sup>. This lineage shows a 50% more transmissibility, realistic possibility in  
696 increased risk of death, and is rapidly dominating over other variants in more than 75  
697 countries. The mutations on the spike protein might play most crucial role both in increasing  
698 transmission fitness and a slightly reduced neutralization to antibody <sup>167,168</sup>. Other mutations  
699 may still play roles in viral replication and pathogenesis through different epistatic  
700 interactions. B.1.351 lineage of clade GH also showed a faster spread and higher load of virus

701 in swabs, as well as, higher binding affinity to ACE2 receptor and escape from neutralizing  
702 antibody due to three mutations (K417N, E484K and N501Y) at key sites of the RBD <sup>169</sup>.  
703 This lineage has mutations on the E, N, and ORF1a proteins, functions of which are yet to be  
704 determined <sup>170</sup>. Similar important mutational package in RBD with known biological  
705 importance to B.1.351 lineage, except for K417T and several others in the ORF1a, N, ORF8,  
706 and ORF3a, was found in P.1 (descendent of B.1.1.28) lineage of GR clade <sup>171,172</sup>. B.1.258  
707 lineage under G clade contained N439K that has higher binding affinity with new contact  
708 point to ACE2 and can evade antibody-mediated immunity<sup>173,174</sup>. The mutations in proteins  
709 other than spike of these new variants could have effects that needs further investigation.  
710 Recently, the variants are supplanting their original clade strains throughout the world due to  
711 RBD mutation effects, which makes correlating the clade with case fatality rate difficult and  
712 evolutionary theory complex. Due to these variants, recent data of January suggests an  
713 increase of GR strains where GH and GV are similar in different regions and worldwide in a  
714 weekly basis (data not shown). However, the death-case ratio is following the previous trends  
715 of around 2% in the weeks after 3<sup>rd</sup> January.

716 The GH and GR strains have seemingly arisen during the initial phase of the pandemic  
717 with a limited frequency, and at that time, have not attained the necessary viral fitness. Both  
718 strains have evolved from Europe and Australia after spreading quietly alongside the  
719 vigorous G strain. After the public awareness and other social interventions, these strains,  
720 especially GR have probably increased in fitness. Although Hu and Riley <sup>159</sup> have recently  
721 reported the co-circulation of both G and GH strains correlating with mortality in different  
722 states, how the association among multiple clades would modulate the evolutionary dynamics  
723 is now a burning question. With the new data of GV strains as shown in our study, the  
724 previous analysis by Hodcroft et al. (2020) <sup>24</sup> can be updated to recent time that may change  
725 result of the association. Our analysis has considered the evolutionary trade-off between  
726 virulence and sustainable fitness of these strains based on the global emergence of the strains,  
727 their death-case ratio, structural stability, and predicted molecular mechanisms. The relation  
728 of the host-pathogen interactions, host allelic variations, and host immunity needs to correlate  
729 with virulence by in vivo studies.

#### 730 **4. CONCLUSION**

731 The course of COVID-19 pandemic was continuing, although the death rate was  
732 gradually decreasing in 2020. Our study hypothesized that this paradoxical scenario was

733 related to the effect of the dominant co-occurring mutations. The significant association of  
734 death-case ratio with GR clade mutant could be linked with the signature mutation in  
735 nucleocapsid protein. GH clade mutant might contribute to cryptic transmission by ORF3a-  
736 mediated low immune response in asymptomatic hosts. GV strains have spread quickly by  
737 superspreading events, but we speculated a role of more stable linker region of N protein on  
738 low virulence. G clade mutants, however, was speculated to assist in frequent transmissions  
739 through severe symptoms lead to the isolation of infected persons restricting further  
740 spreading and significantly increased the risk of death by a factor of 1.03. Therefore, it can be  
741 speculated that the fitness of SAR-CoV-2 virus may increase in terms of survivability and  
742 transmission, while the next phase of the COVID-19 pandemic may continue with less  
743 virulent mutants. However, further investigations are required to strengthen this hypothesis.  
744 Effective management of the infected patients and social distancing to prevent viral  
745 transmission should be the first priority that may prevent the emergence of more virulent  
746 strains.

#### 747 **Data Availability**

748 All the sequence data were taken from the GISAID (<https://www.gisaid.org/>) and  
749 RCSB PDB (<https://www.rcsb.org/>) as mentioned in the methodology section. We provide all  
750 the necessary information such as accession numbers, date-based data source for helping  
751 readers and reviewers to check the authenticity of the work.

#### 752 **Acknowledgments**

753 We would like to acknowledge the team at GISAID for creating SARS-CoV-2 global  
754 database. The funding of the research was provided by Jashore University of Science and  
755 Technology. We appreciate to the Microbial Genetics and Bioinformatics Laboratory of  
756 University of Dhaka for the support of the high-performance computer access. We thanked  
757 M. Shaminur Rahman and Spencer Mark Mondol for their technical assistance in protein  
758 structure analyses.

#### 759 **Biographical Note:**

760 A. S. M. Rubayet Ul Alam is a lecturer in the Department of Microbiology, Jashore  
761 University of Science and Technology. His research mainly focuses on molecular biology,  
762 data analysis, and bioinformatics.



763 Ovinu Kibria Islam is an assistant professor in the Department of Microbiology,  
764 Jashore University of Science and Technology. His research activity is focused on molecular  
765 biology and big data analysis.

766 Md. Shazid Hasan is a lecturer in the Department of Microbiology, Jashore University  
767 of Science and Technology. His research activity is focused on molecular biology and  
768 bioinformatics.

769 Mir Raihanul Islam is the Senior Research Associate of BRAC James P Grant School  
770 of Public Health, BRAC University who is expert in statistical analysis and epidemiological  
771 study and is currently working on many active researches related to public health.

772 Shafi Mahmud is working as a thesis student in the department of Genetic  
773 Engineering and Biotechnology, University of Rajshahi, Rajshai-6205, Bangladesh.

774 Hassan M. Al-Emran is an assistant professor in the Department of Biomedical  
775 Engineering, Jashore University of Science and Technology, Jashore-7408, Bangladesh. His  
776 research mainly focuses on clinical microbiology and infectious diseases.

777 Dr. Iqbal Kabir Jahid is a professor and chairman in the Department of Microbiology,  
778 Jashore University of Science and Technology. His research mainly focuses on molecular  
779 biology.

780 Keith A. Crandall is a professor in the Department of Biostatistics & Bioinformatics  
781 and the director of Computational Biology Institute, Director of Genomics Core, Milken  
782 Institute School of Public Health, The George Washington University, Washington, DC,  
783 USA.

784 M. Anwar Hossain is the director of Genome Center, and vice chancellor of Jashore  
785 University of Science and Technology. He is an expert in molecular biology, virology and  
786 vaccine development.

## 787 REFERENCES

- 788 1 Lu, R. *et al.* Genomic characterisation and epidemiology of 2019 novel coronavirus:  
789 implications for virus origins and receptor binding. *The Lancet* **395**, 565-574 (2020).  
790 2 WHO. Coronavirus disease (COVID-19) Situation Report – 168 *WHO situation*  
791 *Reports* (2020).  
792 3 Hoffmann, M., Kleine-Weber, H. & Pöhlmann, S. A multibasic cleavage site in the  
793 spike protein of SARS-CoV-2 is essential for infection of human lung cells.  
794 *Molecular Cell* (2020).

- 795 4 Hoque, M. N., Chaudhury, A., Akanda, M. A. M., Hossain, M. A. & Islam, M. T.  
796 Genomic diversity and evolution, diagnosis, prevention, and therapeutics of the  
797 pandemic COVID-19 disease. *PeerJ* **8**, e9689 (2020).
- 798 5 Petersen, E. *et al.* Comparing SARS-CoV-2 with SARS-CoV and influenza  
799 pandemics. *The Lancet infectious diseases* (2020).
- 800 6 Romano, M., Ruggiero, A., Squeglia, F., Maga, G. & Berisio, R. A Structural View of  
801 SARS-CoV-2 RNA Replication Machinery: RNA Synthesis, Proofreading and Final  
802 Capping. *Cells* **9**, 1267 (2020).
- 803 7 Rahman, M. S. *et al.* Epitope-based chimeric peptide vaccine design against S, M and  
804 E proteins of SARS-CoV-2 etiologic agent of global pandemic COVID-19: an in  
805 silico approach. *PeerJ* **8**, e9572 (2020).
- 806 8 Yoshimoto, F. K. The Proteins of Severe Acute Respiratory Syndrome Coronavirus-2  
807 (SARS CoV-2 or n-COV19), the Cause of COVID-19. *The protein journal* **39**, 198-  
808 216, doi:10.1007/s10930-020-09901-4 (2020).
- 809 9 Callaway, E. The coronavirus is mutating-does it matter? *Nature* **585**, 174-177  
810 (2020).
- 811 10 Islam, M. R. *et al.* Genome-wide analysis of SARS-CoV-2 virus strains circulating  
812 worldwide implicates heterogeneity. *Scientific reports* **10**, 1-9 (2020).
- 813 11 Rahman, M. S. *et al.* Comprehensive annotations of the mutational spectra of  
814 SARS-CoV-2 spike protein: a fast and accurate pipeline. *Transboundary and*  
815 *emerging diseases* (2020).
- 816 12 Eskier, D., Karakulah G, Suner A, Oktay Y. RdRp mutations are associated with  
817 SARS-CoV-2 genome evolution. *PeerJ* **8**, 9587,  
818 doi:<https://doi.org/10.7717/peerj.9587> (2020).
- 819 13 Hassan, S. S., Choudhury, P. P., Basu, P. & Jana, S. S. Molecular conservation and  
820 Differential mutation on ORF3a gene in Indian SARS-CoV2 genomes. *Genomics*  
821 (2020).
- 822 14 Shaminur Rahman, M. *et al.* Evolutionary dynamics of SARS-CoV-2 nucleocapsid  
823 (N) protein and its consequences. *Journal of medical virology*.
- 824 15 Shu, Y. & McCauley, J. GISAID: Global initiative on sharing all influenza data—from  
825 vision to reality. *Eurosurveillance* **22**, 30494 (2017).
- 826 16 Yin, C. Genotyping coronavirus SARS-CoV-2: methods and implications. *Genomics*  
827 **112**, 3588-3596, doi:10.1016/j.ygeno.2020.04.016 (2020).
- 828 17 Korber, B. *et al.* Tracking changes in SARS-CoV-2 Spike: evidence that D614G  
829 increases infectivity of the COVID-19 virus. *Cell* **182**, 812-827. e819 (2020).
- 830 18 Mercatelli, D. & Giorgi, F. M. Geographic and Genomic Distribution of SARS-CoV-  
831 2 Mutations. *Frontiers in Microbiology* **11**, doi:10.3389/fmicb.2020.01800 (2020).
- 832 19 Brufsky, A. Distinct Viral Clades of SARS-CoV-2: Implications for Modeling of  
833 Viral Spread. *Journal of medical virology* (2020).
- 834 20 Islam, O. *et al.* Emergence of European and North American mutant variants of  
835 SARS-CoV-2 in Southeast Asia. (2020).
- 836 21 Ul Alam, A. R., Rafiul Islam, M., Shaminur Rahman, M., Islam, O. K. & Anwar  
837 Hossain, M. Understanding the possible origin and genotyping of first Bangladeshi  
838 SARS-CoV-2 strain. *Journal of Medical Virology* (2020).
- 839 22 Becerra-Flores, M. & Cardozo, T. SARS-CoV-2 viral spike G614 mutation  
840 exhibits higher case fatality rate. *International Journal of Clinical Practice* (2020).
- 841 23 Issa, E., Merhi, G., Panossian, B., Salloum, T. & Tokajian, S. SARS-CoV-2 and  
842 ORF3a: Nonsynonymous Mutations, Functional Domains, and Viral Pathogenesis.  
843 *Msystems* **5** (2020).

- 844 24 Hodcroft, E. B. *et al.* Emergence and spread of a SARS-CoV-2 variant through  
845 Europe in the summer of 2020. *medRxiv* (2020).
- 846 25 Grubaugh, N. D., Hanage, W. P. & Rasmussen, A. L. Making sense of mutation: what  
847 D614G means for the COVID-19 pandemic remains unclear. *Cell* (2020).
- 848 26 Pachetti, M. *et al.* Emerging SARS-CoV-2 mutation hot spots include a novel RNA-  
849 dependent-RNA polymerase variant. *Journal of Translational Medicine* **18**, 1-9  
850 (2020).
- 851 27 of the International, C. S. G. The species Severe acute respiratory syndrome-related  
852 coronavirus: classifying 2019-nCoV and naming it SARS-CoV-2. *Nature*  
853 *Microbiology* **5**, 536 (2020).
- 854 28 Dalgaard, P. in *Introductory statistics with R* 259-274 (Springer, 2008).
- 855 29 Wang, W., Tang, J. & Wei, F. Updated understanding of the outbreak of 2019 novel  
856 coronavirus (2019-nCoV) in Wuhan, China. *Journal of medical virology* **92**, 441-447  
857 (2020).
- 858 30 WHO. Coronavirus disease (COVID-19) Weekly Epidemiological Update and  
859 Weekly Operational Update. *WHO situation Reports* (2020).
- 860 31 Rodrigues, C. H., Pires, D. E. & Ascher, D. B. DynaMut: predicting the impact of  
861 mutations on protein conformation, flexibility and stability. *Nucleic acids research*  
862 **46**, W350-W355 (2018).
- 863 32 Schymkowitz, J. *et al.* The FoldX web server: an online force field. *Nucleic acids*  
864 *research* **33**, W382-W388 (2005).
- 865 33 Delgado, J., Radusky, L. G., Cianferoni, D. & Serrano, L. FoldX 5.0: working with  
866 RNA, small molecules and a new graphical interface. *Bioinformatics* **35**, 4168-4169  
867 (2019).
- 868 34 Rost, B., Yachdav, G. & Liu, J. The predictprotein server. *Nucleic acids research* **32**,  
869 W321-W326 (2004).
- 870 35 Waterhouse, A. *et al.* SWISS-MODEL: homology modelling of protein structures and  
871 complexes. *Nucleic acids research* **46**, W296-W303 (2018).
- 872 36 Webb, B. & Sali, A. Comparative protein structure modeling using MODELLER.  
873 *Current protocols in bioinformatics* **54**, 5.6. 1-5.6. 37 (2016).
- 874 37 Roy, A., Kucukural, A. & Zhang, Y. I-TASSER: a unified platform for automated  
875 protein structure and function prediction. *Nature protocols* **5**, 725-738 (2010).
- 876 38 Wang, Q. *et al.* Structural basis for RNA replication by the SARS-CoV-2 polymerase.  
877 *Cell* **182**, 417-428. e413 (2020).
- 878 39 Van Zundert, G. *et al.* The HADDOCK2. 2 web server: user-friendly integrative  
879 modeling of biomolecular complexes. *Journal of molecular biology* **428**, 720-725  
880 (2016).
- 881 40 Xue, L. C., Rodrigues, J. P., Kastritis, P. L., Bonvin, A. M. & Vangone, A.  
882 PRODIGY: a web server for predicting the binding affinity of protein-protein  
883 complexes. *Bioinformatics* **32**, 3676-3678, doi:10.1093/bioinformatics/btw514  
884 (2016).
- 885 41 Hu, J. *et al.* The D614G mutation of SARS-CoV-2 spike protein enhances viral  
886 infectivity. *bioRxiv* (2020).
- 887 42 de Vries, S. J. & Bonvin, A. M. CPORT: a consensus interface predictor and its  
888 performance in prediction-driven docking with HADDOCK. *PloS one* **6**, e17695  
889 (2011).
- 890 43 Yan, Y., Tao, H., He, J. & Huang, S.-Y. The HDock server for integrated protein-  
891 protein docking. *Nature protocols* **15**, 1829-1852 (2020).
- 892 44 Land, H. & Humble, M. S. in *Protein Engineering* 43-67 (Springer, 2018).

- 893 45 Dickson, C. J. *et al.* Lipid14: the amber lipid force field. *Journal of chemical theory*  
894 *and computation* **10**, 865-879 (2014).
- 895 46 Krieger, E. & Vriend, G. New ways to boost molecular dynamics simulations.  
896 *Journal of computational chemistry* **36**, 996-1007 (2015).
- 897 47 Krieger, E., Nielsen, J. E., Spronk, C. A. & Vriend, G. Fast empirical pKa prediction  
898 by Ewald summation. *Journal of molecular graphics and modelling* **25**, 481-486  
899 (2006).
- 900 48 Chowdhury, K. H. *et al.* Drug Repurposing Approach against Novel Coronavirus  
901 Disease (COVID-19) through Virtual Screening Targeting SARS-CoV-2 Main  
902 Protease. *Biology* **10**, 2 (2021).
- 903 49 Pramanik, S. K. *et al.* Fermentation optimization of cellulase production from  
904 sugarcane bagasse by *Bacillus pseudomycolides* and molecular modeling study of  
905 cellulase. *Current Research in Microbial Sciences* **2**, 100013 (2021).
- 906 50 Swargiary, A., Mahmud, S. & Saleh, M. A. Screening of phytochemicals as potent  
907 inhibitor of 3-chymotrypsin and papain-like proteases of SARS-CoV2: an in silico  
908 approach to combat COVID-19. *Journal of Biomolecular Structure and Dynamics*, 1-  
909 15 (2020).
- 910 51 Yan, H. & Yu, C. Repair of full-thickness cartilage defects with cells of different  
911 origin in a rabbit model. *Arthroscopy: The Journal of Arthroscopic & Related Surgery*  
912 **23**, 178-187 (2007).
- 913 52 Zuker, M. Mfold web server for nucleic acid folding and hybridization prediction.  
914 *Nucleic acids research* **31**, 3406-3415 (2003).
- 915 53 Huston, N. C., Wan, H., Tavares, R. d. C. A., Wilen, C. & Pyle, A. M.  
916 Comprehensive in-vivo secondary structure of the SARS-CoV-2 genome reveals  
917 novel regulatory motifs and mechanisms. *BioRxiv* (2020).
- 918 54 Rane, J. S., Chatterjee, A., Kumar, A. & Ray, S. (ChemRxiv, 2020).
- 919 55 Souza, P. F., Lopes, F. E., Amaral, J. L., Freitas, C. D. & Oliveira, J. T. A molecular  
920 docking study revealed that synthetic peptides induced conformational changes in the  
921 structure of SARS-CoV-2 spike glycoprotein, disrupting the interaction with human  
922 ACE2 receptor. *International journal of biological macromolecules* **164**, 66-76  
923 (2020).
- 924 56 Elfiky, A. A. Ribavirin, Remdesivir, Sofosbuvir, Galidesivir, and Tenofovir against  
925 SARS-CoV-2 RNA dependent RNA polymerase (RdRp): A molecular docking study.  
926 *Life sciences*, 117592 (2020).
- 927 57 Aftab, S. O. *et al.* Analysis of SARS-CoV-2 RNA-dependent RNA polymerase as a  
928 potential therapeutic drug target using a computational approach. *Journal of*  
929 *translational medicine* **18**, 1-15 (2020).
- 930 58 Bhattacharyya, C. *et al.* SARS-CoV-2 mutation 614G creates an elastase cleavage site  
931 enhancing its spread in high AAT-deficient regions. *Infection, Genetics and*  
932 *Evolution*, 104760 (2021).
- 933 59 Backhaus, A. Common Pitfalls in the Interpretation of COVID-19 Data and Statistics.  
934 *Intereconomics* **55**, 162-166 (2020).
- 935 60 Sáez, C., Romero, N., Conejero, J. A. & García-Gómez, J. M. Potential limitations in  
936 COVID-19 machine learning due to data source variability: A case study in the  
937 nCov2019 dataset. *Journal of the American Medical Informatics Association* **28**, 360-  
938 364 (2021).
- 939 61 L.R. Lopes Junior, S. A., M. Qazvini COVID-19: Statistics, Ratios and understanding  
940 limitations of data available. *ICAT: Data Limitations sub-group* (2020).
- 941 62 Zeberg, H. & Pääbo, S. The major genetic risk factor for severe COVID-19 is  
942 inherited from Neanderthals. *Nature* **587**, 610-612 (2020).

- 943 63 Zeberg, H. & Pääbo, S. A genomic region associated with protection against severe  
944 COVID-19 is inherited from Neandertals. *Proceedings of the National Academy of*  
945 *Sciences* **118** (2021).
- 946 64 Jain, V. K., Iyengar, K., Vaish, A. & Vaishya, R. Differential mortality in COVID-19  
947 patients from India and western countries. *Diabetes & Metabolic Syndrome: Clinical*  
948 *Research & Reviews* **14**, 1037-1041 (2020).
- 949 65 Goel, S. *et al.* Clinical characteristics and in-hospital mortality for COVID-19 across  
950 the Globe. *Cardiology and Therapy* **9**, 553-559 (2020).
- 951 66 Samaddar, A., Gadepalli, R., Nag, V. L. & Misra, S. The enigma of low COVID-19  
952 fatality rate in India. *Frontiers in Genetics* **11**, 854 (2020).
- 953 67 Villani, L., McKee, M., Giraldi, L., Ricciardi, W. & Boccia, S. Comparison of deaths  
954 rates for COVID-19 across Europe. (2020).
- 955 68 Njenga, M. K. *et al.* Why is there low morbidity and mortality of COVID-19 in  
956 Africa? *The American journal of tropical medicine and hygiene* **103**, 564-569 (2020).
- 957 69 Omais, S. O., Kharroubi, S. O. & Zaraket, H. No association between the SARS-CoV-  
958 2 variants and mortality rates in the Eastern Mediterranean Region. *medRxiv* (2021).
- 959 70 Hamed, S. M., Elkhatib, W. F., Khairallah, A. S. & Noreddin, A. M. Global dynamics  
960 of SARS-CoV-2 clades and their relation to COVID-19 epidemiology. (2020).
- 961 71 McKee, M., Gugushvili, A., Koltai, J. & Stuckler, D. Are populist leaders creating the  
962 conditions for the spread of COVID-19?; Comment on “A scoping review of populist  
963 radical right parties’ influence on welfare policy and its implications for population  
964 health in Europe”. *International journal of health policy and management* (2020).
- 965 72 Dearlove, B. *et al.* A SARS-CoV-2 vaccine candidate would likely match all currently  
966 circulating variants. *Proceedings of the National Academy of Sciences* **117**, 23652-  
967 23662 (2020).
- 968 73 Rausch, J. W., Capoferri, A. A., Katusime, M. G., Patro, S. C. & Kearney, M. F. Low  
969 genetic diversity may be an Achilles heel of SARS-CoV-2. *Proceedings of the*  
970 *National Academy of Sciences* **117**, 24614-24616 (2020).
- 971 74 Plante, J. A. *et al.* Spike mutation D614G alters SARS-CoV-2 fitness. *Nature*, 1-9  
972 (2020).
- 973 75 Hou, Y. J. *et al.* SARS-CoV-2 D614G variant exhibits efficient replication *ex vivo*  
974 and transmission *in vivo*. *Science* (2020).
- 975 76 Eaaswarkhanth, M., Al Madhoun, A. & Al-Mulla, F. Could the D614 G substitution  
976 in the SARS-CoV-2 spike (S) protein be associated with higher COVID-19 mortality?  
977 *International Journal of Infectious Diseases* (2020).
- 978 77 Omotuyi, I. O. *et al.* Atomistic simulation reveals structural mechanisms underlying  
979 D614G spike glycoprotein-enhanced fitness in SARS-CoV-2. *Journal of*  
980 *computational chemistry* **41**, 2158-2161 (2020).
- 981 78 Korber, B. *et al.* Tracking changes in SARS-CoV-2 Spike: evidence that D614G  
982 increases infectivity of the COVID-19 virus. *Cell* (2020).
- 983 79 Phan, T. Genetic diversity and evolution of SARS-CoV-2. *Infection, genetics and*  
984 *evolution* **81**, 104260 (2020).
- 985 80 Belouzard, S., Chu, V. C. & Whittaker, G. R. Activation of the SARS coronavirus  
986 spike protein via sequential proteolytic cleavage at two distinct sites. *Proceedings of*  
987 *the National Academy of Sciences* **106**, 5871-5876 (2009).
- 988 81 Perona, J. J. & Craik, C. S. Structural basis of substrate specificity in the serine  
989 proteases. *Protein Science* **4**, 337-360 (1995).
- 990 82 Fu, Z., Thorpe, M., Akula, S., Chahal, G. & Hellman, L. T. Extended cleavage  
991 specificity of human neutrophil elastase, human proteinase 3, and their distant

- 992 ortholog clawed frog PR3—three elastases with similar primary but different  
993 extended specificities and stability. *Frontiers in Immunology* **9**, 2387 (2018).
- 994 83 Li, F. Structure, function, and evolution of coronavirus spike proteins. *Annual review*  
995 *of virology* **3**, 237-261 (2016).
- 996 84 Walls, A. C. *et al.* Tectonic conformational changes of a coronavirus spike  
997 glycoprotein promote membrane fusion. *Proceedings of the National Academy of*  
998 *Sciences* **114**, 11157-11162 (2017).
- 999 85 Zhang, L. *et al.* SARS-CoV-2 spike-protein D614G mutation increases virion spike  
1000 density and infectivity. *Nature communications* **11**, 1-9 (2020).
- 1001 86 Weissman, D. *et al.* D614G spike mutation increases SARS CoV-2 susceptibility to  
1002 neutralization. *Cell host & microbe* **29**, 23-31. e24 (2021).
- 1003 87 Wrapp, D. *et al.* Cryo-EM structure of the 2019-nCoV spike in the prefusion  
1004 conformation. *Science* **367**, 1260-1263 (2020).
- 1005 88 Hillen, H. S. *et al.* Structure of replicating SARS-CoV-2 polymerase. *Nature*, 1-6  
1006 (2020).
- 1007 89 Yin, W. *et al.* Structural basis for inhibition of the RNA-dependent RNA polymerase  
1008 from SARS-CoV-2 by remdesivir. *Science* (2020).
- 1009 90 Kirchdoerfer, R. N. & Ward, A. B. Structure of the SARS-CoV nsp12 polymerase  
1010 bound to nsp7 and nsp8 co-factors. *Nature communications* **10**, 1-9 (2019).
- 1011 91 Gao, Y. *et al.* Structure of the RNA-dependent RNA polymerase from COVID-19  
1012 virus. *Science* **368**, 779-782 (2020).
- 1013 92 Chand, G., Banerjee A, Azad GK. Identification of novel mutations in RNA-  
1014 dependent RNA polymerases of SARS-CoV-2 and their implications on its protein  
1015 structure. *PeerJ* **8**, e9492, doi:<https://doi.org/10.7717/peerj.9492> (2020).
- 1016 93 Begum, F., Mukherjee, D., Das, S., Thagriki, D., Tripathi, P. P., Banerjee, A. K., &  
1017 Ray, U. Specific mutations in SARS-CoV2 RNA dependent RNA polymerase and  
1018 helicase alter protein structure, dynamics and thus function: Effect on viral RNA  
1019 replication. *bioRxiv.org* (2020).
- 1020 94 Chand, G. B., Banerjee, A. & Azad, G. K. Identification of novel mutations in RNA-  
1021 dependent RNA polymerases of SARS-CoV-2 and their implications on its protein  
1022 structure. *bioRxiv* (2020).
- 1023 95 Eskier, D., Karakulah, G., Suner, A. & Oktay, Y. RdRp mutations are associated with  
1024 SARS-CoV-2 genome evolution. *bioRxiv* (2020).
- 1025 96 Pond, S. Genomic diversity and divergence of SARS-CoV-2/COVID-19 from  
1026 GISAID. (2020).
- 1027 97 Kern, D. M. *et al.* Cryo-EM structure of the SARS-CoV-2 3a ion channel in lipid  
1028 nanodiscs. *BioRxiv* (2020).
- 1029 98 Malasics, A. *et al.* Protein structure and ionic selectivity in calcium channels:  
1030 Selectivity filter size, not shape, matters. *Biochimica et Biophysica Acta (BBA)-*  
1031 *Biomembranes* **1788**, 2471-2480 (2009).
- 1032 99 Naranjo, D., Moldenhauer, H., Pincuntureo, M. & Díaz-Franulic, I. Pore size matters  
1033 for potassium channel conductance. *Journal of General Physiology* **148**, 277-291  
1034 (2016).
- 1035 100 Stephens, R. F., Guan, W., Zhorov, B. S. & Spafford, J. D. Selectivity filters and  
1036 cysteine-rich extracellular loops in voltage-gated sodium, calcium, and NALCN  
1037 channels. *Frontiers in Physiology* **6**, 153 (2015).
- 1038 101 Suárez-Delgado, E. & Islas, L. D. Ion Channels: A novel origin for calcium  
1039 selectivity. *Elife* **9**, e55216 (2020).

- 1040 102 Kondratskyi, A., Kondratska, K., Skryma, R. & Prevarskaya, N. Ion channels in the  
1041 regulation of apoptosis. *Biochimica et Biophysica Acta (BBA)-Biomembranes* **1848**,  
1042 2532-2546 (2015).
- 1043 103 Yue, Y. *et al.* SARS-Coronavirus Open Reading Frame-3a drives multimodal necrotic  
1044 cell death. *Cell death & disease* **9**, 1-15 (2018).
- 1045 104 Pinton, P., Giorgi, C., Siviero, R. & Zecchini, E. Rizzuto R. *Bcl-2 and Ca* **2**, 1409-  
1046 1418 (2006).
- 1047 105 Nieva, J. L., Madan, V. & Carrasco, L. Viroporins: structure and biological functions.  
1048 *Nature Reviews Microbiology* **10**, 563-574 (2012).
- 1049 106 Ren, Y. *et al.* The ORF3a protein of SARS-CoV-2 induces apoptosis in cells. *Cellular*  
1050 *& molecular immunology*, 1-3 (2020).
- 1051 107 Castaño-Rodríguez, C. *et al.* Role of severe acute respiratory syndrome coronavirus  
1052 viroporins E, 3a, and 8a in replication and pathogenesis. *MBio* **9** (2018).
- 1053 108 Boni, M. F. & Lemey, P. Evolutionary origins of the SARS-CoV-2 sarbecovirus  
1054 lineage responsible for the COVID-19 pandemic. *Nature microbiology*,  
1055 doi:10.1038/s41564-020-0771-4 (2020).
- 1056 109 Halfmann, P. J. *et al.* Transmission of SARS-CoV-2 in domestic cats. *New England*  
1057 *Journal of Medicine* (2020).
- 1058 110 Shi, J. *et al.* Susceptibility of ferrets, cats, dogs, and other domesticated animals to  
1059 SARS-coronavirus 2. *Science* **368**, 1016-1020 (2020).
- 1060 111 Ayub, M. I. Reporting Two SARS-CoV-2 Strains Based on A Unique Trinucleotide-  
1061 Bloc Mutation and Their Potential Pathogenic Difference. *Preprints*  
1062 doi:10.20944/preprints202004.0337.v1 (2020).
- 1063 112 Chang, C.-k., Hou, M.-H., Chang, C.-F., Hsiao, C.-D. & Huang, T.-h. The SARS  
1064 coronavirus nucleocapsid protein-forms and functions. *Antiviral research* **103**, 39-50  
1065 (2014).
- 1066 113 Tylor, S. *et al.* The SR-rich motif in SARS-CoV nucleocapsid protein is important for  
1067 virus replication. *Canadian journal of microbiology* **55**, 254-260 (2009).
- 1068 114 Rahman, M. S. *et al.* Evolutionary dynamics of SARS-CoV-2 nucleocapsid protein  
1069 and its consequences. *Journal of medical virology* (2020).
- 1070 115 Järvelin, A. I., Noerenberg, M., Davis, I. & Castello, A. The new (dis) order in RNA  
1071 regulation. *Cell Communication and Signaling* **14**, 9 (2016).
- 1072 116 Kikkert, M. Innate immune evasion by human respiratory RNA viruses. *Journal of*  
1073 *innate immunity* **12**, 4-20 (2020).
- 1074 117 Kopecky-Bromberg, S. A., Martínez-Sobrido, L., Frieman, M., Baric, R. A. & Palese,  
1075 P. Severe acute respiratory syndrome coronavirus open reading frame (ORF) 3b, ORF  
1076 6, and nucleocapsid proteins function as interferon antagonists. *Journal of virology*  
1077 **81**, 548-557 (2007).
- 1078 118 McBride, R., Van Zyl, M. & Fielding, B. C. The coronavirus nucleocapsid is a  
1079 multifunctional protein. *Viruses* **6**, 2991-3018 (2014).
- 1080 119 Sokalingam, S., Raghunathan, G., Soundrarajan, N. & Lee, S.-G. A study on the  
1081 effect of surface lysine to arginine mutagenesis on protein stability and structure using  
1082 green fluorescent protein. *PloS one* **7**, e40410 (2012).
- 1083 120 Haynes, C. & Iakoucheva, L. M. Serine/arginine-rich splicing factors belong to a class  
1084 of intrinsically disordered proteins. *Nucleic acids research* **34**, 305-312 (2006).
- 1085 121 Carlson, C. R., Asfaha, J. B., Ghent, C. M., Howard, C. J., Hartooni, N., Safari, M., ...  
1086 & Morgan, D. O. Phosphoregulation of Phase Separation by the SARS-CoV-2 N  
1087 Protein Suggests a Biophysical Basis for its Dual Functions. *Molecular Cell* **11**, 025,  
1088 doi:<https://doi.org/10.1016/j.molcel.2020.11.025>. (2020).

- 1089 122 Schuster, N. A. Using the nucleocapsid protein to investigate the relationship between  
1090 SARS-CoV-2 and closely related bat and pangolin coronaviruses. *BioRxiv* (2020).
- 1091 123 de Haan, C. A. & Rottier, P. J. Molecular interactions in the assembly of  
1092 coronaviruses. *Advances in virus research* **64**, 165-230 (2005).
- 1093 124 Rangan, R. *et al.* RNA genome conservation and secondary structure in SARS-CoV-2  
1094 and SARS-related viruses: a first look. *Rna* **26**, 937-959 (2020).
- 1095 125 Huston, N. C. *et al.* Comprehensive in vivo secondary structure of the SARS-CoV-2  
1096 genome reveals novel regulatory motifs and mechanisms. *Molecular cell* **81**, 584-598.  
1097 e585 (2021).
- 1098 126 Kristofich, J. *et al.* Synonymous mutations make dramatic contributions to fitness  
1099 when growth is limited by a weak-link enzyme. *PLoS genetics* **14**, e1007615 (2018).
- 1100 127 Mitra, S., Ray, S. K. & Banerjee, R. Synonymous codons influencing gene expression  
1101 in organisms. *Research and Reports in Biochemistry* **6**, 57 (2016).
- 1102 128 Hurst, K. R., Ye, R., Goebel, S. J., Jayaraman, P. & Masters, P. S. An interaction  
1103 between the nucleocapsid protein and a component of the replicase-transcriptase  
1104 complex is crucial for the infectivity of coronavirus genomic RNA. *Journal of*  
1105 *virology* **84**, 10276-10288 (2010).
- 1106 129 Hurst, K. R., Koetzner, C. A. & Masters, P. S. Characterization of a critical  
1107 interaction between the coronavirus nucleocapsid protein and nonstructural protein 3  
1108 of the viral replicase-transcriptase complex. *Journal of virology* **87**, 9159-9172  
1109 (2013).
- 1110 130 Serrano, P. *et al.* Nuclear magnetic resonance structure of the N-terminal domain of  
1111 nonstructural protein 3 from the severe acute respiratory syndrome coronavirus.  
1112 *Journal of virology* **81**, 12049-12060 (2007).
- 1113 131 Du, X. *et al.* Networks of genomic co-occurrence capture characteristics of human  
1114 influenza A (H3N2) evolution. *Genome research* **18**, 178-187 (2008).
- 1115 132 Rimmelzwaan, G. *et al.* Full restoration of viral fitness by multiple compensatory co-  
1116 mutations in the nucleoprotein of influenza A virus cytotoxic T-lymphocyte escape  
1117 mutants. *Journal of general virology* **86**, 1801-1805 (2005).
- 1118 133 Deng, L. *et al.* Network of co-mutations in Ebola virus genome predicts the disease  
1119 lethality. *Cell research* **25**, 753-756 (2015).
- 1120 134 Chen, H., Zhou, X., Zheng, J. & Kwoh, C.-K. Rules of co-occurring mutations  
1121 characterize the antigenic evolution of human influenza A/H3N2, A/H1N1 and B  
1122 viruses. *BMC medical genomics* **9**, 69 (2016).
- 1123 135 Rimmelzwaan, G. F., Kreijtz, J. H., Bodewes, R., Fouchier, R. A. & Osterhaus, A. D.  
1124 Influenza virus CTL epitopes, remarkably conserved and remarkably variable.  
1125 *Vaccine* **27**, 6363-6365 (2009).
- 1126 136 Lyons, D. M. & Luring, A. S. Mutation and epistasis in influenza virus evolution.  
1127 *Viruses* **10**, 407 (2018).
- 1128 137 Crow, J. F. *Basic concepts in population, quantitative, and evolutionary genetics.*  
1129 (WH Freeman and Company, 1986).
- 1130 138 Di Giallonardo, F. & Holmes, E. C. Viral biocontrol: grand experiments in disease  
1131 emergence and evolution. *Trends in microbiology* **23**, 83-90 (2015).
- 1132 139 Geoghegan, J. L. & Holmes, E. C. The phylogenomics of evolving virus virulence.  
1133 *Nature Reviews Genetics* **19**, 756-769 (2018).
- 1134 140 Berngruber, T. W., Froissart, R., Choisy, M. & Gandon, S. Evolution of virulence in  
1135 emerging epidemics. *PLoS Pathog* **9**, e1003209 (2013).
- 1136 141 Pantazis, N. *et al.* Temporal trends in prognostic markers of HIV-1 virulence and  
1137 transmissibility: an observational cohort study. *The Lancet HIV* **1**, e119-e126 (2014).
- 1138 142 Mohamed, M. M., El-Shimy, I. A. & Hadi, M. A. (BioMed Central, 2020).



- 1139 143 Smith, E. C., Sexton, N. R. & Denison, M. R. Thinking outside the triangle:  
1140 replication fidelity of the largest RNA viruses. *Annual Review of Virology* **1**, 111-132  
1141 (2014).
- 1142 144 Skjesol, A. *et al.* IPNV with high and low virulence: host immune responses and viral  
1143 mutations during infection. *Virology journal* **8**, 1-14 (2011).
- 1144 145 Pfeiffer, J. K. & Kirkegaard, K. Increased fidelity reduces poliovirus fitness and  
1145 virulence under selective pressure in mice. *PLoS Pathog* **1**, e11 (2005).
- 1146 146 Vignuzzi, M., Stone, J. K., Arnold, J. J., Cameron, C. E. & Andino, R. Quasispecies  
1147 diversity determines pathogenesis through cooperative interactions in a viral  
1148 population. *Nature* **439**, 344-348 (2006).
- 1149 147 Lei, J., Kusov, Y. & Hilgenfeld, R. Nsp3 of coronaviruses: Structures and functions of  
1150 a large multi-domain protein. *Antiviral research* **149**, 58-74 (2018).
- 1151 148 Schoeman, D. & Fielding, B. C. Coronavirus envelope protein: current knowledge.  
1152 *Virology journal* **16**, 1-22 (2019).
- 1153 149 Escors, D., Ortego, J., Laude, H. & Enjuanes, L. The membrane M protein carboxy  
1154 terminus binds to transmissible gastroenteritis coronavirus core and contributes to  
1155 core stability. *Journal of virology* **75**, 1312-1324 (2001).
- 1156 150 J Alsaadi, E. A. & Jones, I. M. Membrane binding proteins of coronaviruses. *Future*  
1157 *Virology* **14**, 275-286 (2019).
- 1158 151 Bai, Y. *et al.* Presumed asymptomatic carrier transmission of COVID-19. *Jama* **323**,  
1159 1406-1407 (2020).
- 1160 152 Quan-Xin, L. *et al.* Clinical and immunological assessment of asymptomatic SARS-  
1161 CoV-2 infections. *Nature medicine* (2020).
- 1162 153 Dennis, C. (Nature Publishing Group, 2001).
- 1163 154 Dieckmann, U., Metz, J. A. & Sabelis, M. W. *Adaptive dynamics of infectious*  
1164 *diseases: in pursuit of virulence management*. Vol. 2 (Cambridge University Press,  
1165 2005).
- 1166 155 Day, T., Gandon, S., Lion, S. & Otto, S. P. On the evolutionary epidemiology of  
1167 SARS-CoV-2. *Current Biology* (2020).
- 1168 156 Ebert, D. & Bull, J. J. Challenging the trade-off model for the evolution of virulence:  
1169 is virulence management feasible? *Trends in microbiology* **11**, 15-20 (2003).
- 1170 157 Lorenzo-Redondo, R. *et al.* A clade of SARS-CoV-2 viruses associated with lower  
1171 viral loads in patient upper airways. *EBioMedicine* **62**, 103112 (2020).
- 1172 158 Abbas, K. *et al.* Routine childhood immunisation during the COVID-19 pandemic in  
1173 Africa: a benefit–risk analysis of health benefits versus excess risk of SARS-CoV-2  
1174 infection. *The Lancet Global Health* (2020).
- 1175 159 Hu, Y. & Riley, L. W. Dissemination and co-circulation of SARS-CoV2 subclades  
1176 exhibiting enhanced transmission associated with increased mortality in Western  
1177 Europe and the United States. *medRxiv* (2020).
- 1178 160 He, X. *et al.* Temporal dynamics in viral shedding and transmissibility of COVID-19.  
1179 *Nature medicine* **26**, 672-675 (2020).
- 1180 161 McCallum, M. *et al.* N-terminal domain antigenic mapping reveals a site of  
1181 vulnerability for SARS-CoV-2. *bioRxiv* (2021).
- 1182 162 Zhang, B.-z. *et al.* Mining of epitopes on spike protein of SARS-CoV-2 from  
1183 COVID-19 patients. *Cell research* **30**, 702-704 (2020).
- 1184 163 Mateus, J. *et al.* Selective and cross-reactive SARS-CoV-2 T cell epitopes in  
1185 unexposed humans. *Science* **370**, 89-94 (2020).
- 1186 164 To, K. K.-W. *et al.* Coronavirus disease 2019 (COVID-19) re-infection by a  
1187 phylogenetically distinct severe acute respiratory syndrome coronavirus 2 strain  
1188 confirmed by whole genome sequencing. *Clinical Infectious Diseases* (2020).

- 1189 165 Volz, E. *et al.* Transmission of SARS-CoV-2 Lineage B. 1.1. 7 in England: Insights  
1190 from linking epidemiological and genetic data. *medRxiv*, 2020.2012. 2030.20249034  
1191 (2021).
- 1192 166 Muik, A. *et al.* Neutralization of SARS-CoV-2 lineage B. 1.1. 7 pseudovirus by  
1193 BNT162b2 vaccine-elicited human sera. *Science* (2021).
- 1194 167 McCarthy, K. R. *et al.* Recurrent deletions in the SARS-CoV-2 spike glycoprotein  
1195 drive antibody escape. *Science* (2021).
- 1196 168 Kemp, S. *et al.* Neutralising antibodies drive Spike mediated SARS-CoV-2 evasion  
1197 (medRxiv). *bioRxiv* (2020).
- 1198 169 Tegally, H. *et al.* Emergence and rapid spread of a new severe acute respiratory  
1199 syndrome-related coronavirus 2 (SARS-CoV-2) lineage with multiple spike mutations  
1200 in South Africa. *medRxiv* (2020).
- 1201 170 grinch. B.1.351\_South African lineage defined by new variant 501Y.V2 - A more  
1202 detailed description of the lineage. *global report investigating novel coronavirus*  
1203 *haplotypes* (2021).
- 1204 171 grinch. P.1\_Brazilian lineage with variants of biological significance E484K, N501Y  
1205 and K417T. *global report investigating novel coronavirus haplotypes* (2021).
- 1206 172 Faria, N. R. *et al.* Genomic characterisation of an emergent SARS-CoV-2 lineage in  
1207 Manaus: preliminary findings. *Virological* (2021).
- 1208 173 Zhou, W. *et al.* N439K variant in spike protein may alter the infection efficiency and  
1209 antigenicity of SARS-CoV-2 based on molecular dynamics simulation. *bioRxiv*  
1210 (2020).
- 1211 174 Thomson, E. C. *et al.* Circulating SARS-CoV-2 spike N439K variants maintain  
1212 fitness while evading antibody-mediated immunity. *Cell* (2021).
- 1213
- 1214
- 1215
- 1216
- 1217
- 1218

1219 **Figure 1. Schematic diagram of SARS-CoV-2 replication in cell showcasing the related**  
1220 **to S, N, ORF3a, RdRp, NSP3 and 5'-UTR based epistatic interactions.**

1221 The replication cycle starts with the ACE2 receptor binding of the spike glycoprotein (S) as  
1222 cornered at the top-left and finishes with the exocytosis at the top-right. The viruses which do  
1223 not carry G-, GH- and/or GR-featured mutations in the S, N, ORF3a, RdRp, NSP3 and 5'-  
1224 UTR are denoted as the wild type where mutants contain those. Throughout the diagram, the  
1225 red and green color icons such as proteins, genome, and virion represent the wild and mutant  
1226 type, respectively. For a generalized virion, we used the blue color. Although this theme is

1227 not show the co-infection of both types, which might occur in rare occasions, we showed the  
1228 comparative epistatic effects side-by-side fashion during the whole replication cycle that will  
1229 make it easy to grasp. Related figure(s) for each protein are shown in the enclosed box. To  
1230 mean the uncertainty or unknown effects of any mutant proteins/RNA structure, we used the  
1231 ‘question’ mark in a pathway and on explanatory box. RdRp- RNA dependent RNA  
1232 polymerase; NSP14- proof-reading enzyme of SARS-CoV-2; ER- endoplasmic reticulum;  
1233 ERGIC- endoplasmic reticulum (ER) Golgi intermediate compartment.

1234 **Figure 2. Global epidemiological scenario of G, GH and GR clades.**

1235 (a) Weekly time-plot showing the percentage of G, GHGR and GV clade viruses with  
1236 worldwide SARS-CoV-2 infections, death cases and death rates from 24 December, 2019  
1237 (collection date of first sequenced virus) to 19<sup>th</sup> October 2020 where the weeks are shown in  
1238 X axis. As low as 9 (for 2<sup>nd</sup> week) to 9587 sequences (for 14<sup>th</sup> Week) were analyzed to  
1239 determine the ratio of G, GH and GR clade (shown in right Y axis) in the sequenced viruses  
1240 based on the availability of high coverage genomes submitted in GISAID until 28<sup>th</sup> of  
1241 October, 2020. For analyzing the death rate for each week, the number of detected infections  
1242 and death cases (left Y axis) were collected from WHO situation reports.

1243 (b) Monthly region wise time-plot showing the percentage of G, GH and GR clades with  
1244 infections, deaths and death rates from January to October of 2020 in 6 WHO regions. 68,125  
1245 sequences were analyzed for Europe, 30,395 for Americas, 14778 for West Pacific, 3050 for  
1246 Southeast Asia, 1170 for Eastern Mediterranean and 1523 for Africa. Infections and death  
1247 cases were collected from WHO situation reports. The data labeling and values in the X and  
1248 Y axis are same to figure 2a.

1249 **Figure 3. Different structural and stability comparison of wild and mutant spike**

1250 **protein.** Structural superposition of wild and mutant spike proteins (a-b); conformation in the  
1251 S1-S2 (c) and S2'sites (d-e); representation of vibrational entropy energy change on the  
1252 mutant type structure (f); and interatomic interaction prediction of both wild (g) and mutant  
1253 (h) types. For Figure a-e, the gray and yellow color represent the wild and mutant protein,  
1254 respectively. (a) The downstream (617-636) of D614G in wild (green) and mutant (red) S  
1255 protein was focused. Overlapping of the wild (D<sub>614</sub>) and mutant (G<sub>614</sub>) S protein showed  
1256 conformational change in the 3D structures. (b) However, the conformational change are in  
1257 the loop region (618-632) of the proteins thus may potentially play role in interacting with  
1258 other proteins or enzymes, such as elastase-2 as we focused in this work. (c) No change was

1259 found in the S1-S2 cleavage site (685-686), depicted in blue color, of the wild and mutant  
1260 protein. **(d)** Surface and **(e)** cartoon (2°) structure of the superimposed wild and mutant  
1261 proteins where the S2' (pink) is situated in surface region and do not show any change in  
1262 accessibility in the residual loop region. **(f)** The mutant (G<sub>614</sub>) protein showed higher  
1263 flexibility in the G<sup>614</sup> (sticks) and its surroundings (red). The intra-molecular interaction  
1264 determined the overall stability of the **(g)** wild and **(h)** mutant structure where C<sub>β</sub> of D<sup>614</sup>  
1265 (aspartic acid at 614; green stick modelled) had two hydrophobic interaction with the benzene  
1266 rings. This intramolecular contacts stabilize the S protein of wild type and missing of this  
1267 bond destabilize the mutant (G<sub>614</sub>) protein. The mutant protein has glycine at 614 which has  
1268 less chance of interacting with other neighboring amino acids due to its shorter and nonpolar  
1269 R-group. The color code representing the bond type is presented in each **(g)** and **(h)**.

1270 **Figure 4. The molecular docking of wild and mutant with elastase-2.** Both the (upper  
1271 figure) wild (D<sub>614</sub>) and (lower figure) mutant (G<sub>614</sub>) version of S protein was shown in golden  
1272 color whereas the elastase-2 docked to D<sub>614</sub> and G<sub>614</sub> in blue and green color, respectively.  
1273 The enlarged views of the docked site were shown in separate boxes. **(a)** The possible docked  
1274 residues (stick model) on the wild S protein (warm pink) and elastase-2 (green) are 618(Thr)-  
1275 619(Glu)-620(Val) and 198(Cys)-199(Phe)-225:227 (Gly, Gly, Cys), respectively. The  
1276 aspartic acid at 614 is 17.3°A far away from the valine (101), apparently the nearest amino  
1277 acid of elastase-2 to the cleavage site (615-616). **(b)** The possible interacting residues (stick  
1278 model) on the mutant S protein (blue) and elastase-2 (warm pink) are 614(Gly)-618(Thr)-  
1279 619(Glu)-620(Val) and 101(Val)-103(Leu)-181(Arg)-222:227(Phe, Val, Arg, Gly, Gly, Cys),  
1280 and 236 (Ala) respectively. In this case, the glycine at 614 is only 5.4°A far away from the  
1281 valine (101), the nearest amino acid of elastase-2 to the cleavage site (615-616).

1282 **Figure 5.** (a) Both the wild and mutated spike protein had lower RMSD profile till 60ns, then  
1283 it rised and maintained steady state. Although the spike protein had higher degree of  
1284 deviation in RMSD profile than RdRp but they did not exceed 3.0Å. The RMSD from  
1285 demonstrated that mutant and wild RdRp protein complex has initial rise of RMSD profile  
1286 due to flexibility. Therefore, both RdRp complexes stabilized after 30ns and maintained  
1287 steady peak. The wild type RdRp complex had little bit higher RMSD peak than mutant  
1288 RdRp which indicates the more flexible nature of the wild type. (b) The spike protein  
1289 complex had similar SASA profile and did not change its surface volume and maintained  
1290 similar trend during the whole simulation time. The higher deviation of SASA indicates that  
1291 mutant and wild type RdRp had straight line but mutant structure had higher SASA profile

1292 which indicates the protein complex had enlarged its surface area. Therefore, mutation in  
1293 RdRp protein leads to more expansion of the surface area than wild types as their average  
1294 SASA value had significant difference. (c) Mutated spike exhibits little more Rg profile than  
1295 the wild type which correlates with the comparative labile nature of the mutant. The higher  
1296 level of Rg value defines the loose packaging system and mobile nature of the protein  
1297 systems. The mutant RdRp had lower level of fluctuations and maintains its integrity in  
1298 whole simulation time. The wild type RdRp complexes had higher deviations and more  
1299 mobility than the mutant complex. (d) Any aberration in hydrogen bond number can lead to  
1300 a higher flexibility. Therefore, the mutant and wild spike protein exhibit same flexibility in  
1301 terms of H-bonding. The mutant RdRp protein had more hydrogen bonding than the wild  
1302 types, but they did not differentiate too much and relatively straight line was observed for the  
1303 protein.

1304 **Figure 6. The molecular interaction of mutant RdRp with NSP8.** The mutant (L<sub>323</sub>) RdRp  
1305 (pale green) and NSP8 (light blue) are interacting as shown in center of the lower figure and  
1306 an enlarged view of the docked site is presented above within a box. The leucine at 323  
1307 interacted with the Asp (112), Cys (114), Val (115), and Pro (116). The wild (P<sub>323</sub>) RdRp has  
1308 identical docking interactions with NSP8 (table 4), thus is not presented as separate figure  
1309 here.

1310 **Figure 7. The effect on transmembrane channel pore of ORF3a viroporin due to**  
1311 **p.Q57H mutation.** (a) The wild (Q<sub>57</sub>) and mutant (H<sub>57</sub>) ORF3a protein are presented in light  
1312 gray and green color, respectively. The structural superposition displays no overall  
1313 conformation change, however the histidine at 57 position of mutant ORF3a (deep blue) has  
1314 slightly rotated from glutamine at same position of the wild protein (bright red). This change  
1315 in rotamer state at 57 residue may influence (b) the overall stability of H<sub>57</sub> (upper part) over  
1316 Q<sub>57</sub> (lower part) because of ionic interaction of histidine (green; stick model) of  
1317 transmembrane domain 1 (TM1) with cysteine at 81 (yellow stick) of TM2. The color code  
1318 defined different bond types is shown in inset.

1319 **Figure 8. Structural superposition of wild and mutant N protein.** The light grey color  
1320 represents both wild (RG<sub>203-204</sub>) and mutant (KR<sub>203-204</sub>) N protein. The linker region (LKR:  
1321 183-247 amino acids) of wild (RG<sub>203-204</sub>) and mutant (KR<sub>203-204</sub>) are in pale yellow and warm  
1322 pink color, respectively. (a) The aligned structures showed a highly destabilizing (Table 3)  
1323 conformational change from 231 to 247 amino acids within LKR. Other regions of the N

1324 protein, especially the SR-rich region (184-204 amino acids) where the mutations occur, do  
 1325 not change. **(b)** A more emphasized look into the SR-rich and mutated sites (RG203-204KR)  
 1326 of wild and mutant N protein represent slight deviation in the Ser (197) and Thr (198) while  
 1327 only glycine (green) to arginine (blue) substitution at 204 position shows changing at rotamer  
 1328 state. The enlarged view is shown in the bottom part.

1329 **Table 1. First occurrence, global frequencies and prevalent zones for co-occurring**  
 1330 **mutation were shown.**

| <b>Mutation/Clade</b>                                                                            | <b>First occurrence<br/>(date, country,<br/>accession)</b> | <b>Global Frequencies<br/>(frequency,<br/>percentage)</b> | <b>Prevalent zone<br/>(zone, frequency,<br/>percentage)</b> |
|--------------------------------------------------------------------------------------------------|------------------------------------------------------------|-----------------------------------------------------------|-------------------------------------------------------------|
| <b>241C&gt;T, 3037C&gt;T,<br/>14408C&gt;T, 23403A&gt;G (G<br/>clade)</b>                         | 03-02-20, England<br>EPI_ISL_464302                        | 47943 (16.57%)                                            | Africa (828, 30.22%)                                        |
| <b>241C&gt;T, 3037C&gt;T,<br/>14408C&gt;T, 23403A&gt;G,<br/>25563G&gt;T<br/>(GH clade)</b>       | 05-02-20, Australia<br>EPI_ISL_480608                      | 61323 (21.19%)                                            | Americas (26647, 55.50%)                                    |
| <b>241C&gt;T, 3037C&gt;T,<br/>14408C&gt;T, 23403A&gt;G,<br/>28881-3GGG&gt;AAC<br/>(GR Clade)</b> | 16-02-20, England<br>EPI_ISL_466615                        | 95217 (32.91%)                                            | Western Pacific (10779,<br>63.50%)                          |
| <b>241C&gt;T, 3037C&gt;T,<br/>14408C&gt;T, 23403A&gt;G,<br/>22227C&gt;T<br/>(GV Clade)</b>       | 15-05-20, Mexico<br>EPI_ISL_516622                         | 65195 (22.53%)                                            | Europe (52864, 36.39%)                                      |

1331

1332 **Table 2. Incidence risk ratio (IRR) for different clade strains against death-case ratio.**

| Variables | Unadjusted |         |             | Adjusted |         |             |
|-----------|------------|---------|-------------|----------|---------|-------------|
|           | IRR        | P value | 95% CI      | IRR      | P value | 95% CI      |
| G clade   | 1.03       | 0.020   | 1.01 - 1.06 | 1.03     | 0.012   | 1.01 - 1.06 |
| GH clade  | 1.01       | 0.171   | 0.99 - 1.03 | 1.00     | 0.789   | 0.99 - 1.02 |
| GR clade  | 0.99       | 0.044   | 0.98 - 0.99 | 0.98     | <0.001  | 0.97 - 0.99 |
| GV clade  | 0.98       | <0.001  | 0.97 – 0.98 | 0.97     | <0.001  | 0.96 - 0.98 |

1333

1334 **Table 3. The scores of HADDOCK, PRODIGY ( $\Delta G$  and  $K_d$  (M) at 37.0 °C) for RdRp/NSP8**  
 1335 **and Spike-Elastase docked complex.**

| Variables                                                                                                     | types  | RdRp/NSP8                                                                                                               | Spike-Elastase                                                                                                                                                                                |
|---------------------------------------------------------------------------------------------------------------|--------|-------------------------------------------------------------------------------------------------------------------------|-----------------------------------------------------------------------------------------------------------------------------------------------------------------------------------------------|
| <b>HADDOCK score</b>                                                                                          | Wild   | -82.2 +/- 7.8                                                                                                           | -43.0 +/- 8.9                                                                                                                                                                                 |
|                                                                                                               | Mutant | -118.3 +/- 2.5                                                                                                          | -61.9 +/- 4.5                                                                                                                                                                                 |
| <b><math>\Delta G</math> (kcal mol<sup>-1</sup>)</b>                                                          | Wild   | -10.6                                                                                                                   | -13.3                                                                                                                                                                                         |
|                                                                                                               | Mutant | -10.5                                                                                                                   | -13.7                                                                                                                                                                                         |
| <b><math>K_d</math> (M) at 37.0 °C</b>                                                                        | Wild   | 3.5E <sup>-08</sup>                                                                                                     | 4.5E <sup>-10</sup>                                                                                                                                                                           |
|                                                                                                               | Mutant | 3.9E <sup>-08</sup>                                                                                                     | 2.3E <sup>-10</sup>                                                                                                                                                                           |
| <b>Number of interfacial contacts (ICs) per property</b>                                                      | Wild   | charged-charged (5); charged-polar (9); charged-apolar (15); polar-polar (2); polar-apolar (16); and apolar-apolar (21) | charged-charged (17); charged-polar (22); charged-apolar (32); polar-polar (5); polar-apolar (31); and apolar-apolar (23)                                                                     |
|                                                                                                               | Mutant | charged-charged(5); charged-polar (16); charged-apolar (19); polar-polar (3); polar-apolar(15); apolar-apolar (23)      | charged-charged (13); charged-polar (18); charged-apolar (27); polar-polar (4); polar-apolar (28) and apolar-apolar (36)                                                                      |
| <b>Associated amino acids of Elastase-2 with possible docking interactions (for spike) or NSP8 (for RdRp)</b> | Wild   | P323: Asp(112), Cys(114), Val(115) and Pro (116)                                                                        | 605 (Ser) and 607 (Gln): 36 (Arg); 618 (Thr): 199 (Phe); 619 (Glu): 199 (Phe), Cys (227); 620 (Val): 198 (Cys), 225:227(Gly, Gly, Cys)                                                        |
|                                                                                                               | Mutant | P323: Asp(112), Cys(114), Val(115) and Pro (116)                                                                        | 614 (Gly): 101 (Val); 618 (Thr): 181 (Arg), 223-226(Val, Arg, Gly, Gly); 619 (Glu): 103 (Leu), 181(Arg), 222-225(Phe, Val, Arg, Gly), 236 (Ala); 620 (Val): 223-227 (Val, Arg, Gly, Gly, Cys) |

1336 **Table 4. Assess the effect of mutations on structural dynamics of NSP-12/ RDRP, Spike,**

1337 **NS3 and N Protein of SARS CoV-2 using DynaMut. The value of  $\Delta\Delta G$  <0 indicates that**

1338 **the mutation causes destabilization and  $\Delta\Delta G$  > 0 represents protein stabilization. For**

1339  $\Delta\Delta S_{vib}ENCoM$ , positive and negative value denotes the increase and decrease of  
 1340 molecular flexibility, respectively.

| Protein Name | Mutation with position | $\Delta\Delta G$ DynaMut kcal/mol | $\Delta\Delta G$ ENCoM kcal/mol | $\Delta\Delta G$ mCSM kcal/mol | $\Delta\Delta G$ SDM kcal/mol | $\Delta\Delta G$ DUET kcal/mol | $\Delta\Delta G$ FoldX (kcal/mol) | Results*             | $\Delta\Delta S_{vib}ENCoM$ kcal.mol <sup>-1</sup> .K <sup>-1</sup> |
|--------------|------------------------|-----------------------------------|---------------------------------|--------------------------------|-------------------------------|--------------------------------|-----------------------------------|----------------------|---------------------------------------------------------------------|
| RdRp         | P323L                  | 1.054                             | -0.441                          | -0.264                         | 0.700                         | 0.118                          | -0.733                            | Stabilizing          | -0.551                                                              |
| Spike        | D614G                  | -0.769                            | +0.408                          | -0.492                         | 2.530                         | 0.195                          | +0.289                            | Destabilizing        | 0.510                                                               |
| ORF3a        | Q57H                   | 0.275                             | -0.128                          | 0.788                          | 0.520                         | -0.464                         | -1.438                            | Stabilizing          | -0.160                                                              |
| N Protein    | RG203-04KR             | -                                 | -                               | -                              | -                             | -                              | -3.42262                          | Highly Destabilizing | -                                                                   |
| N protein    | A220V                  | 0.109                             | 0.458                           | -0.586                         | -1.460                        | -0.567                         | +1.6                              | Stabilizing          | -0.572                                                              |

1341  
 1342 **\*The final result of the stability for each protein was determined based on the intra-**  
 1343 **molecular interactome analysis.**





medRxiv preprint doi: <https://doi.org/10.1101/2021.02.21.21252137>; this version posted February 23, 2021. The copyright holder for this preprint (which was not certified by peer review) is the author/funder, who has granted medRxiv a license to display the preprint in perpetuity. All rights reserved. No reuse allowed without permission.

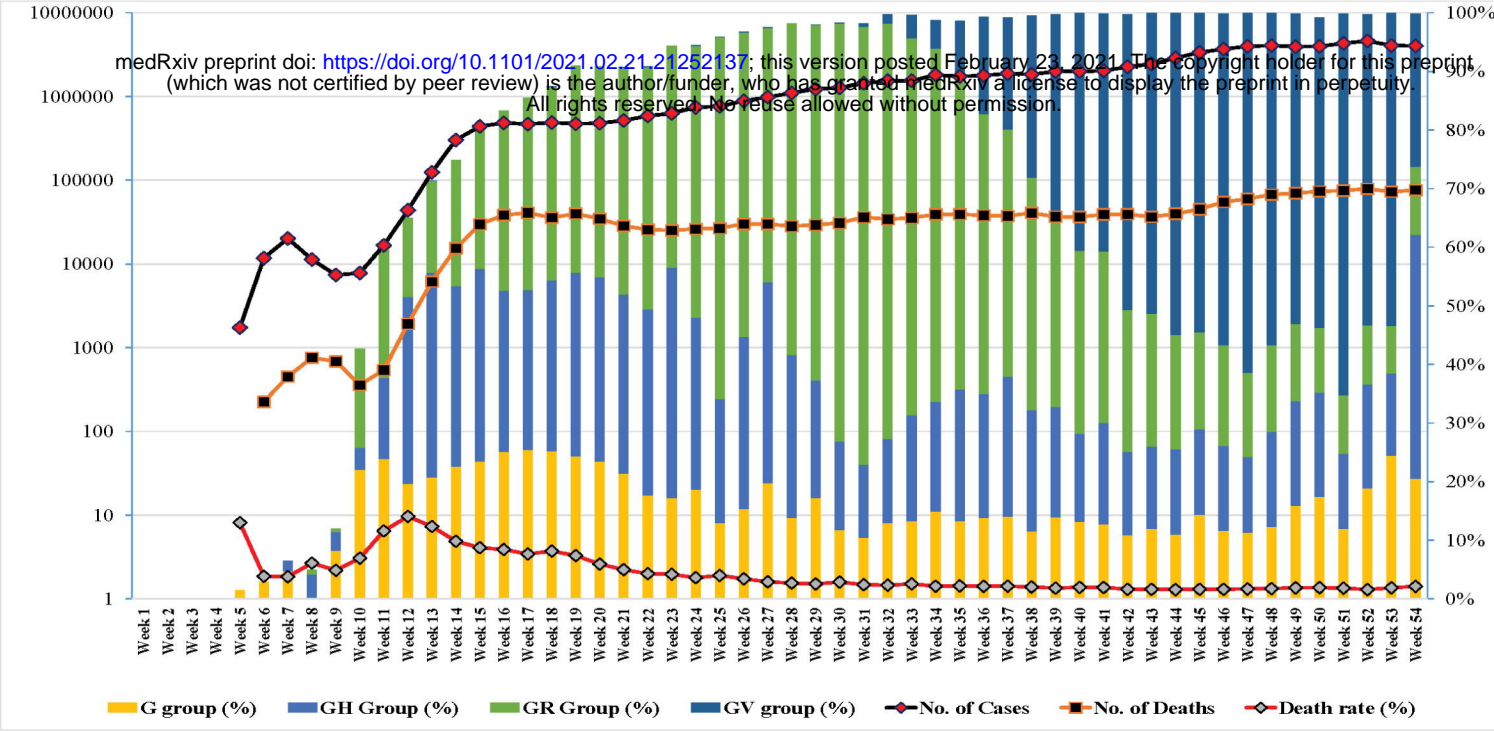

a

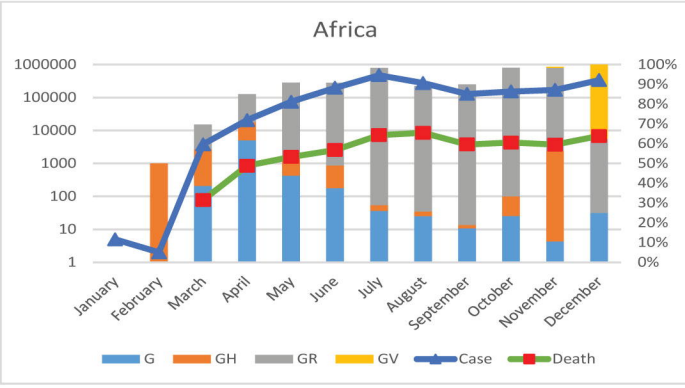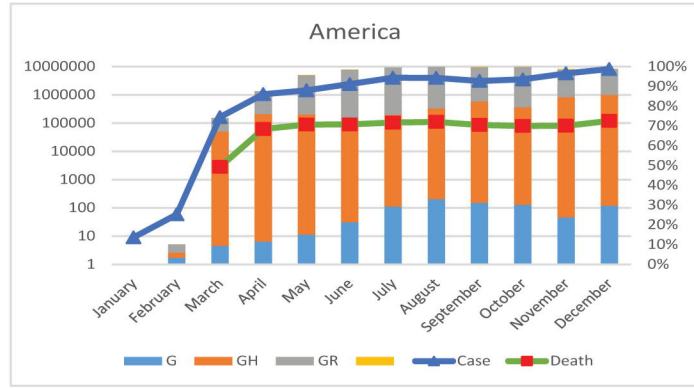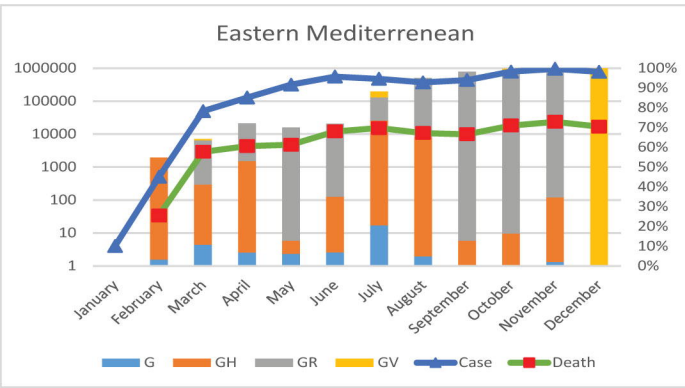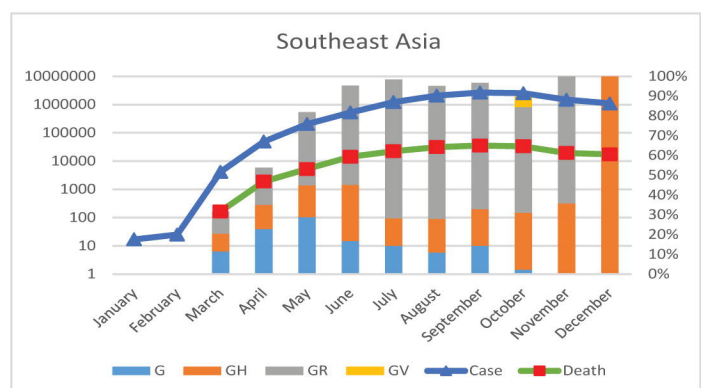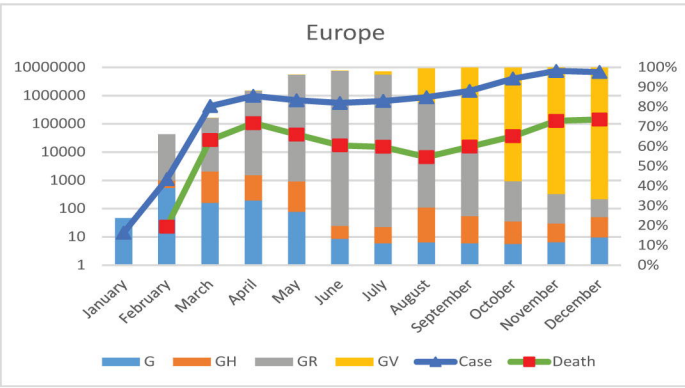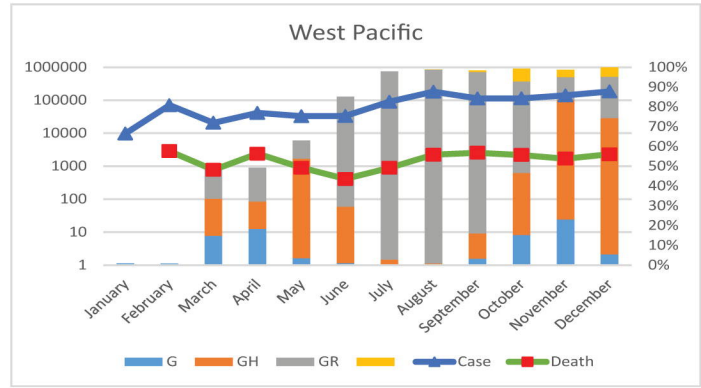

b

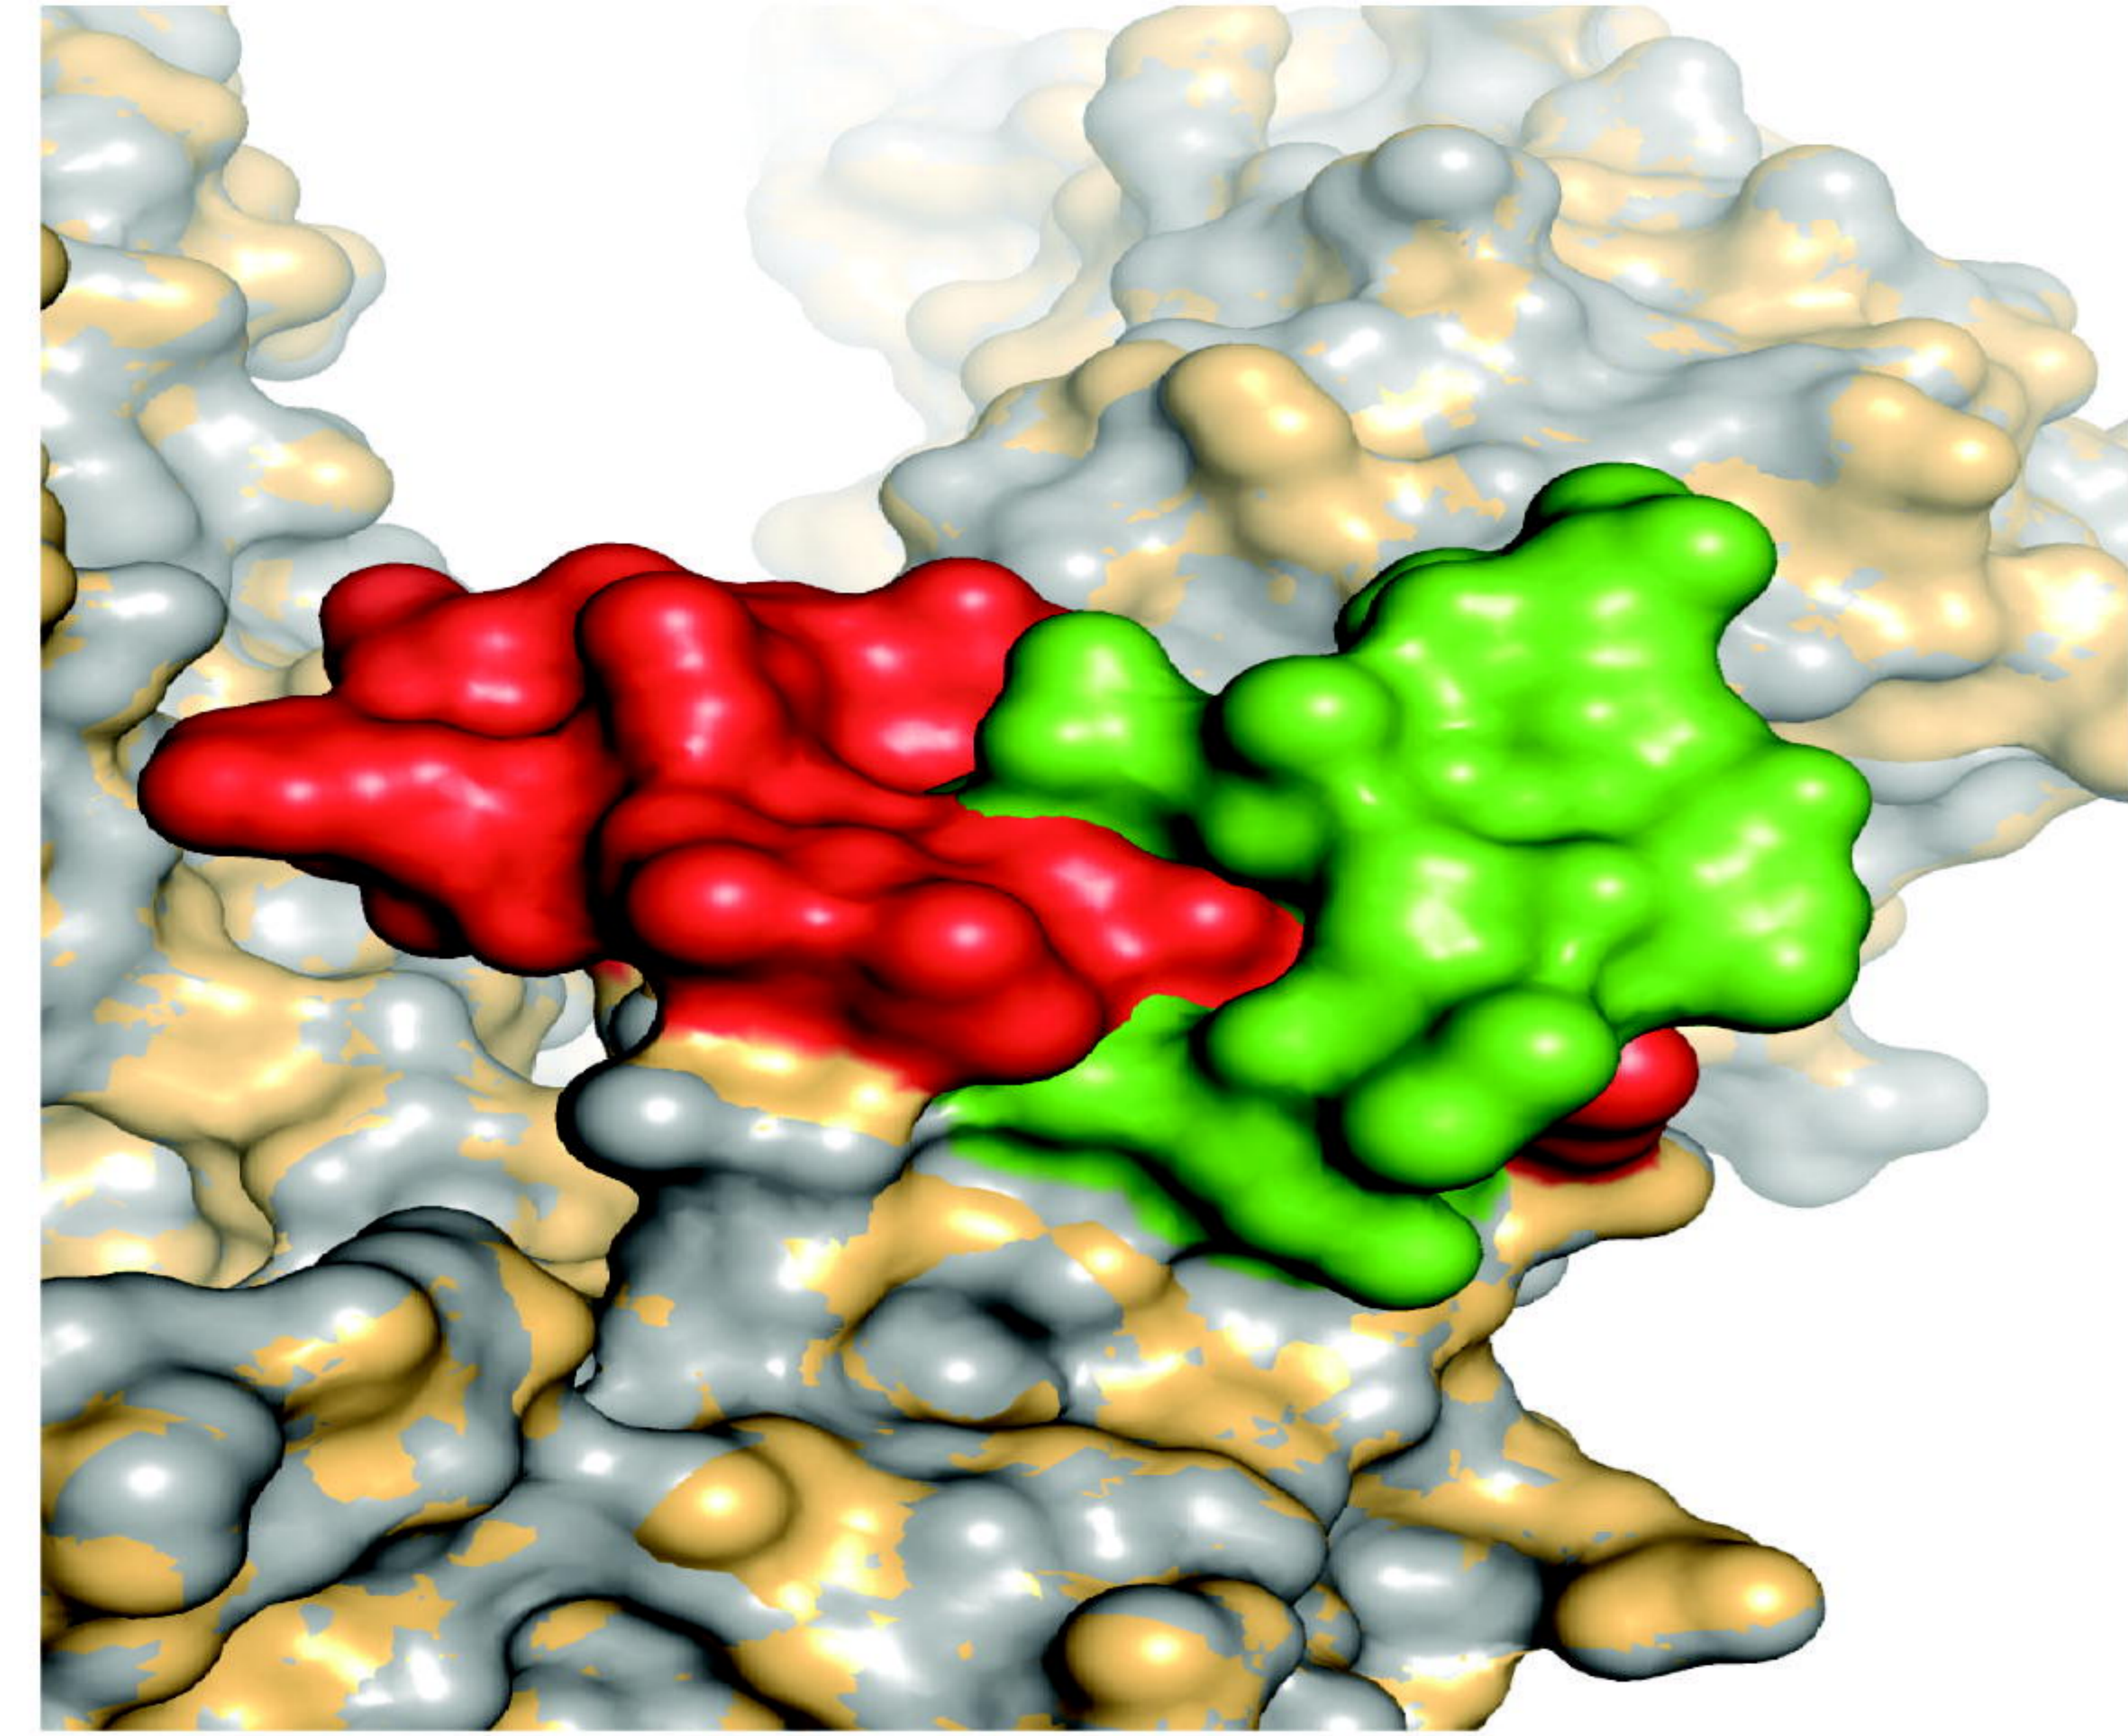

a

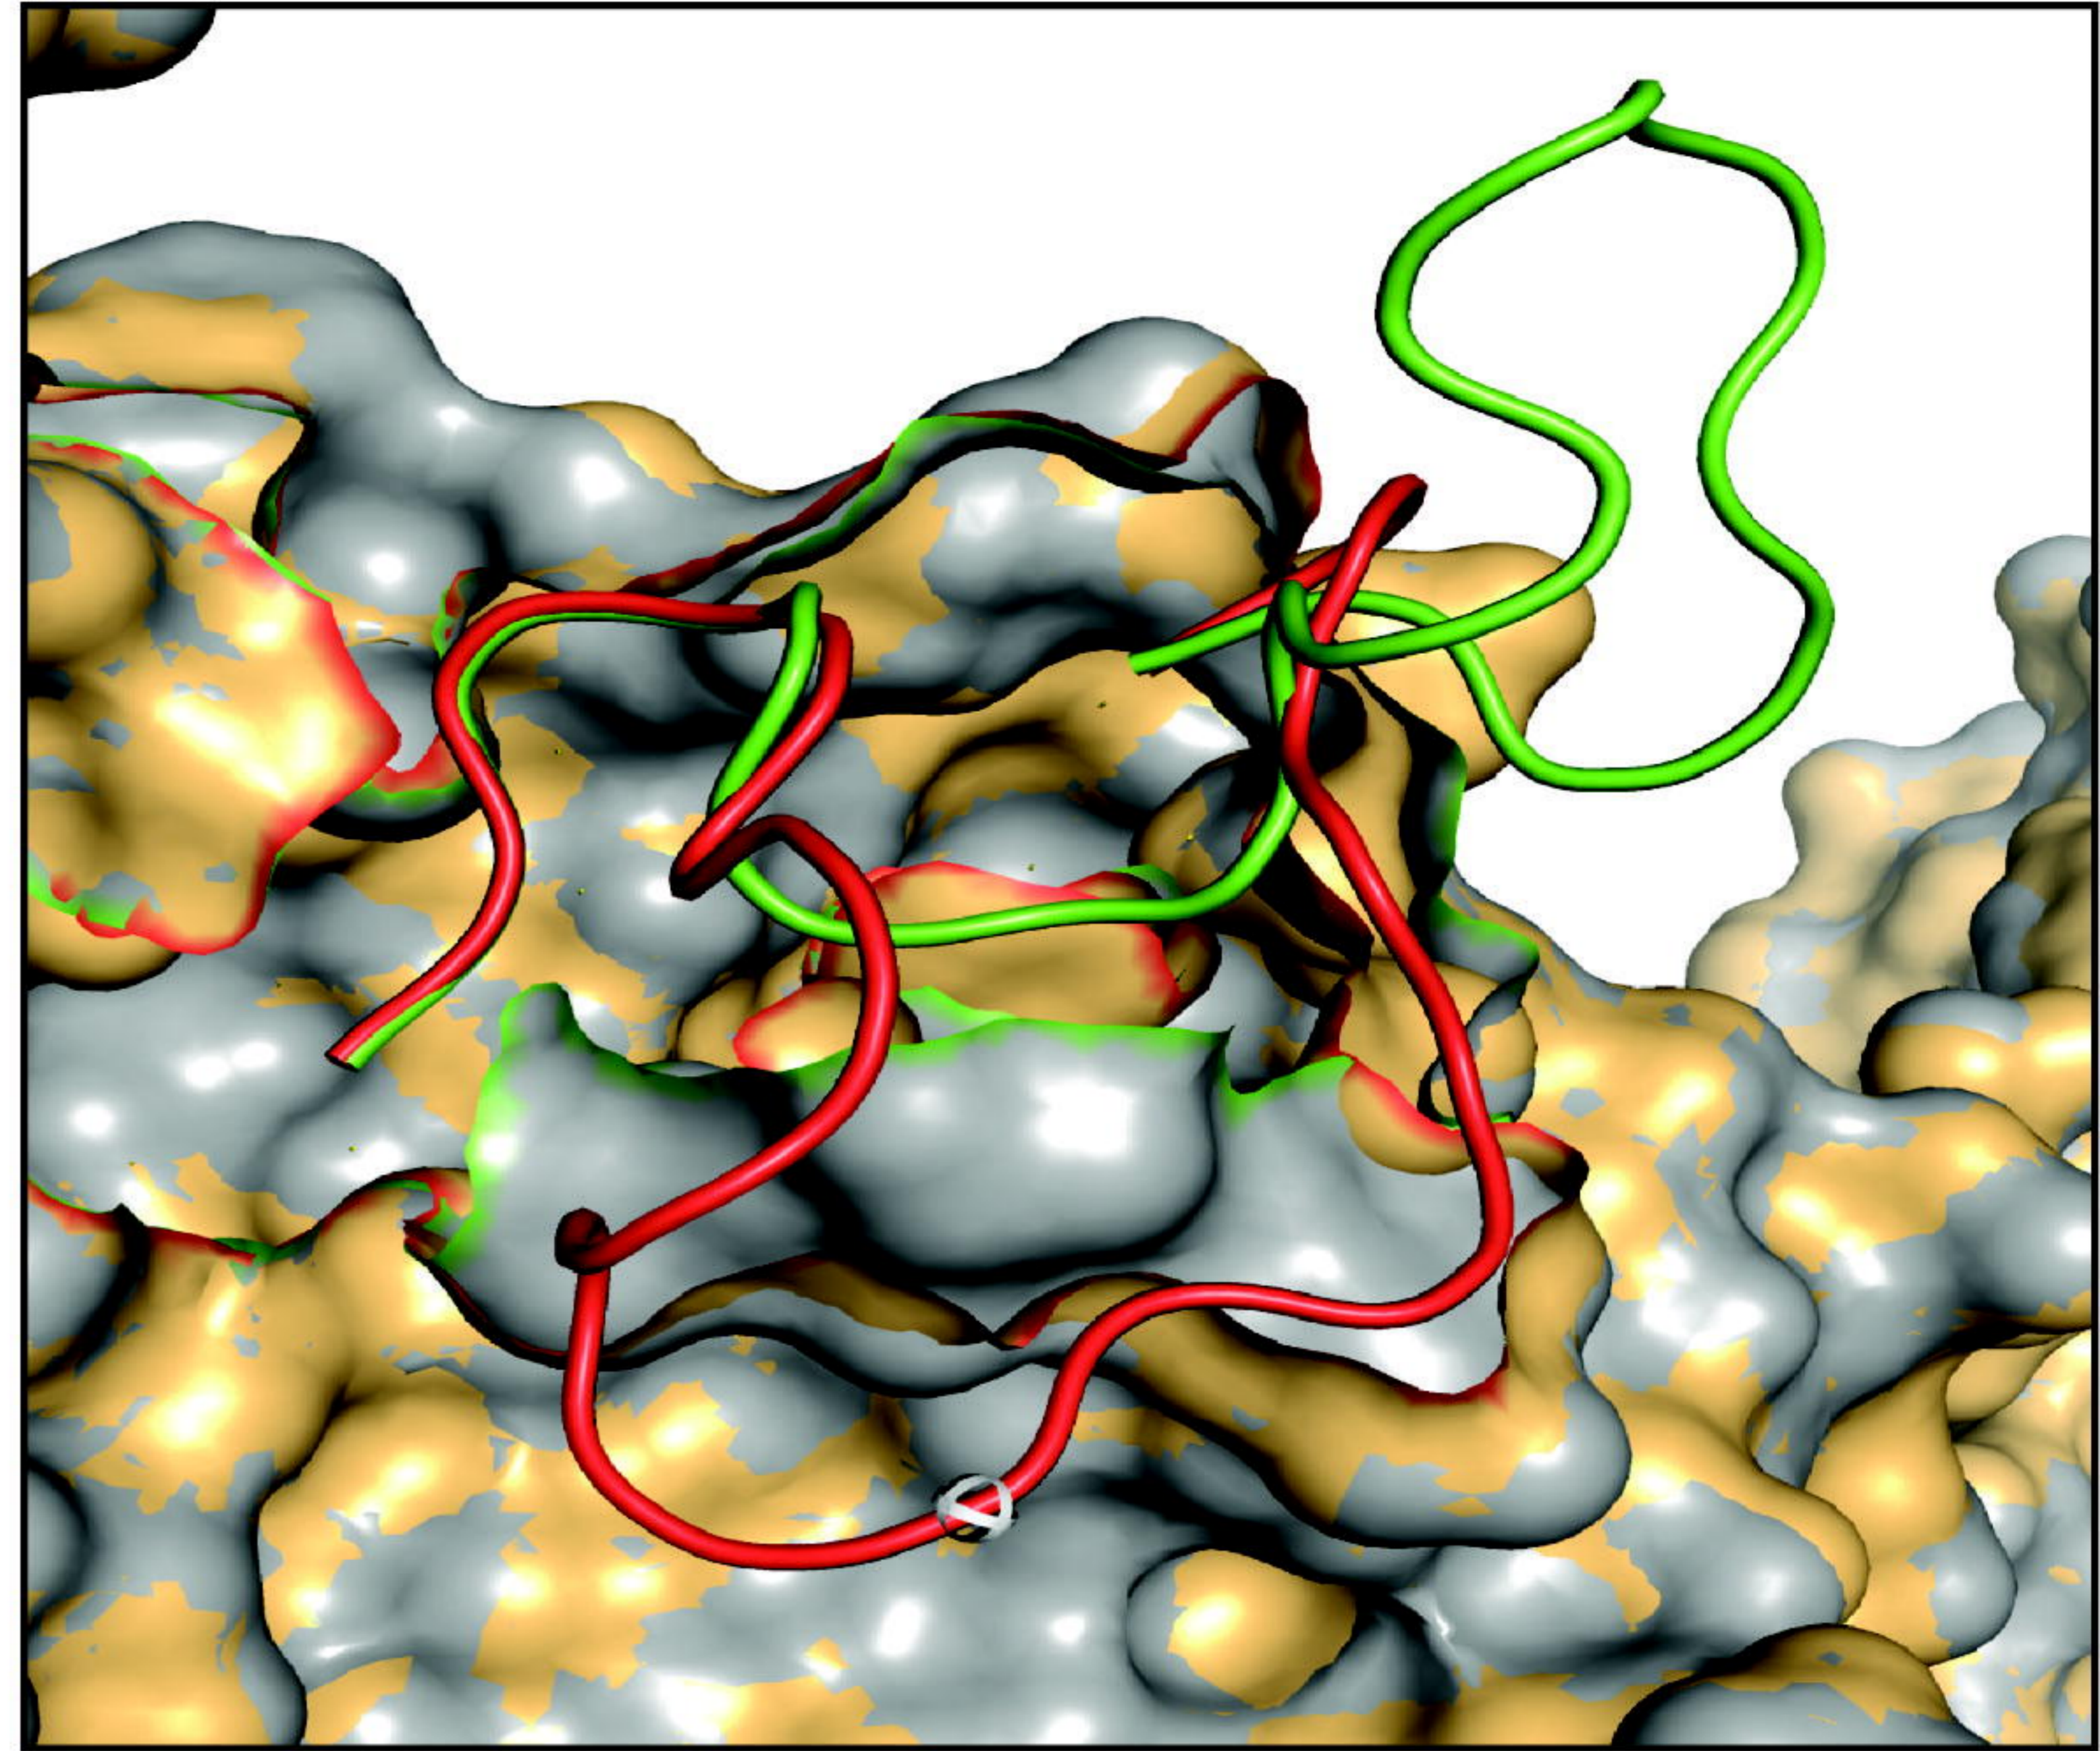

b

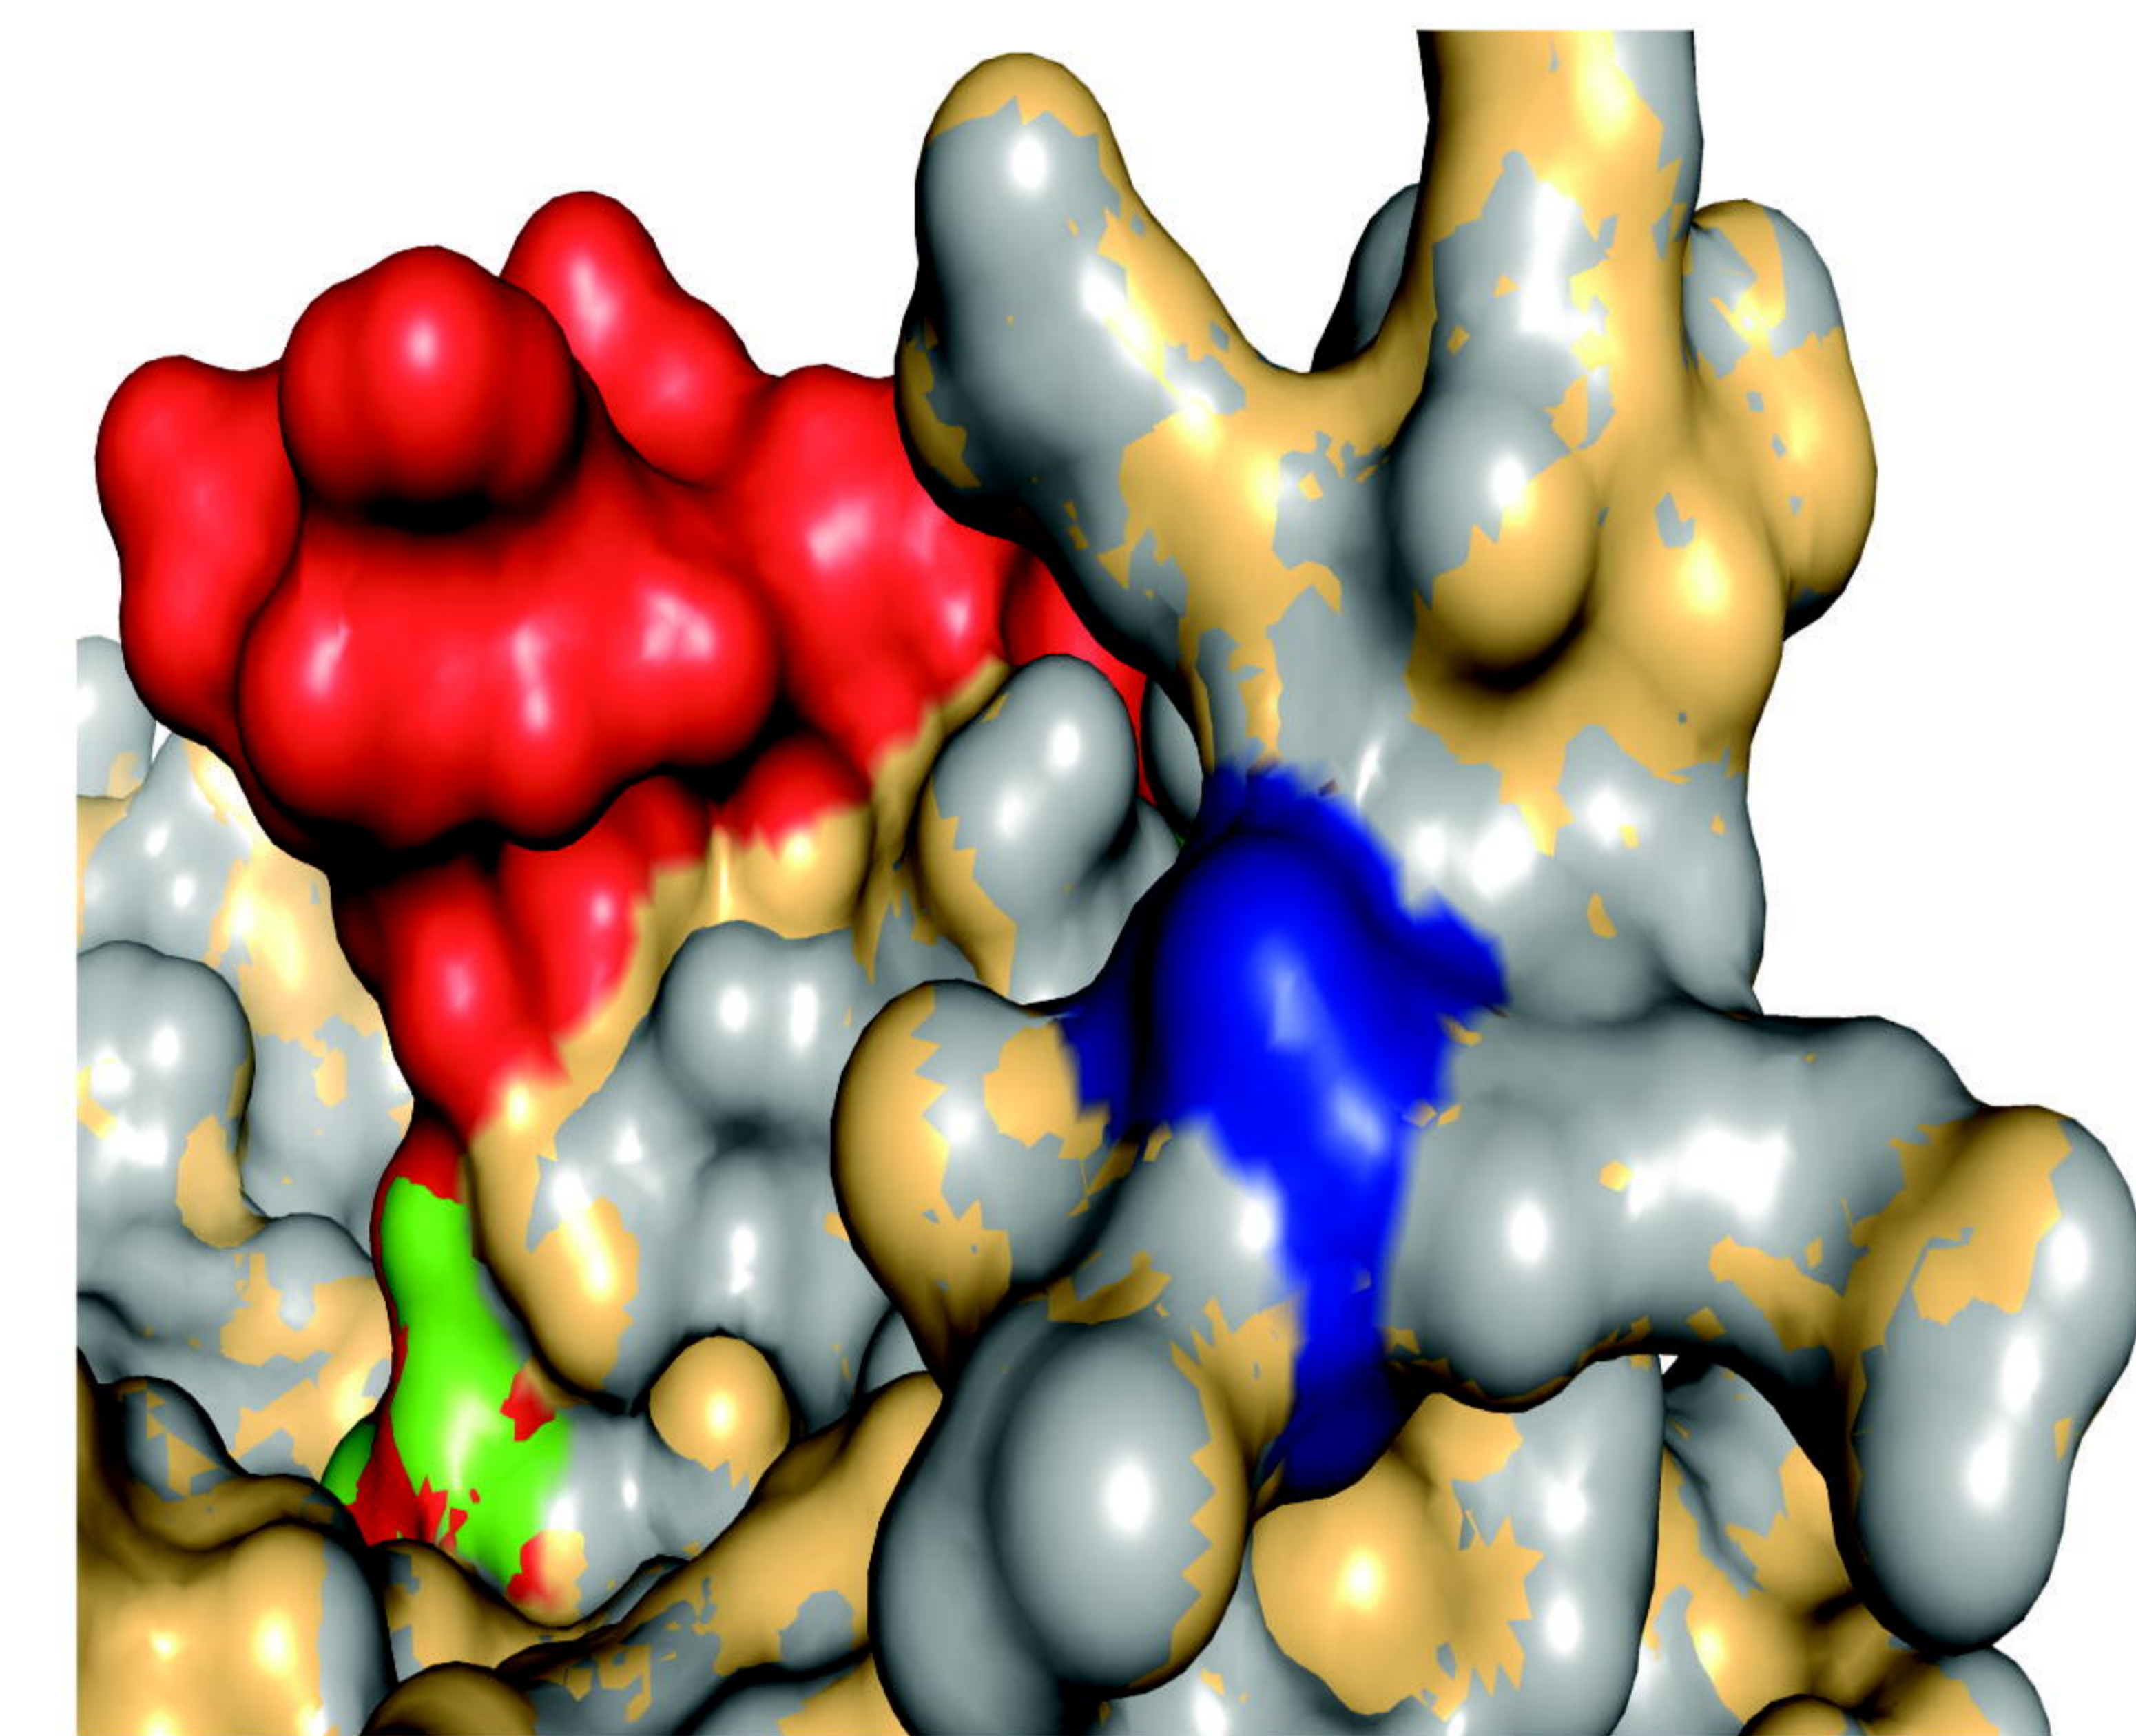

c

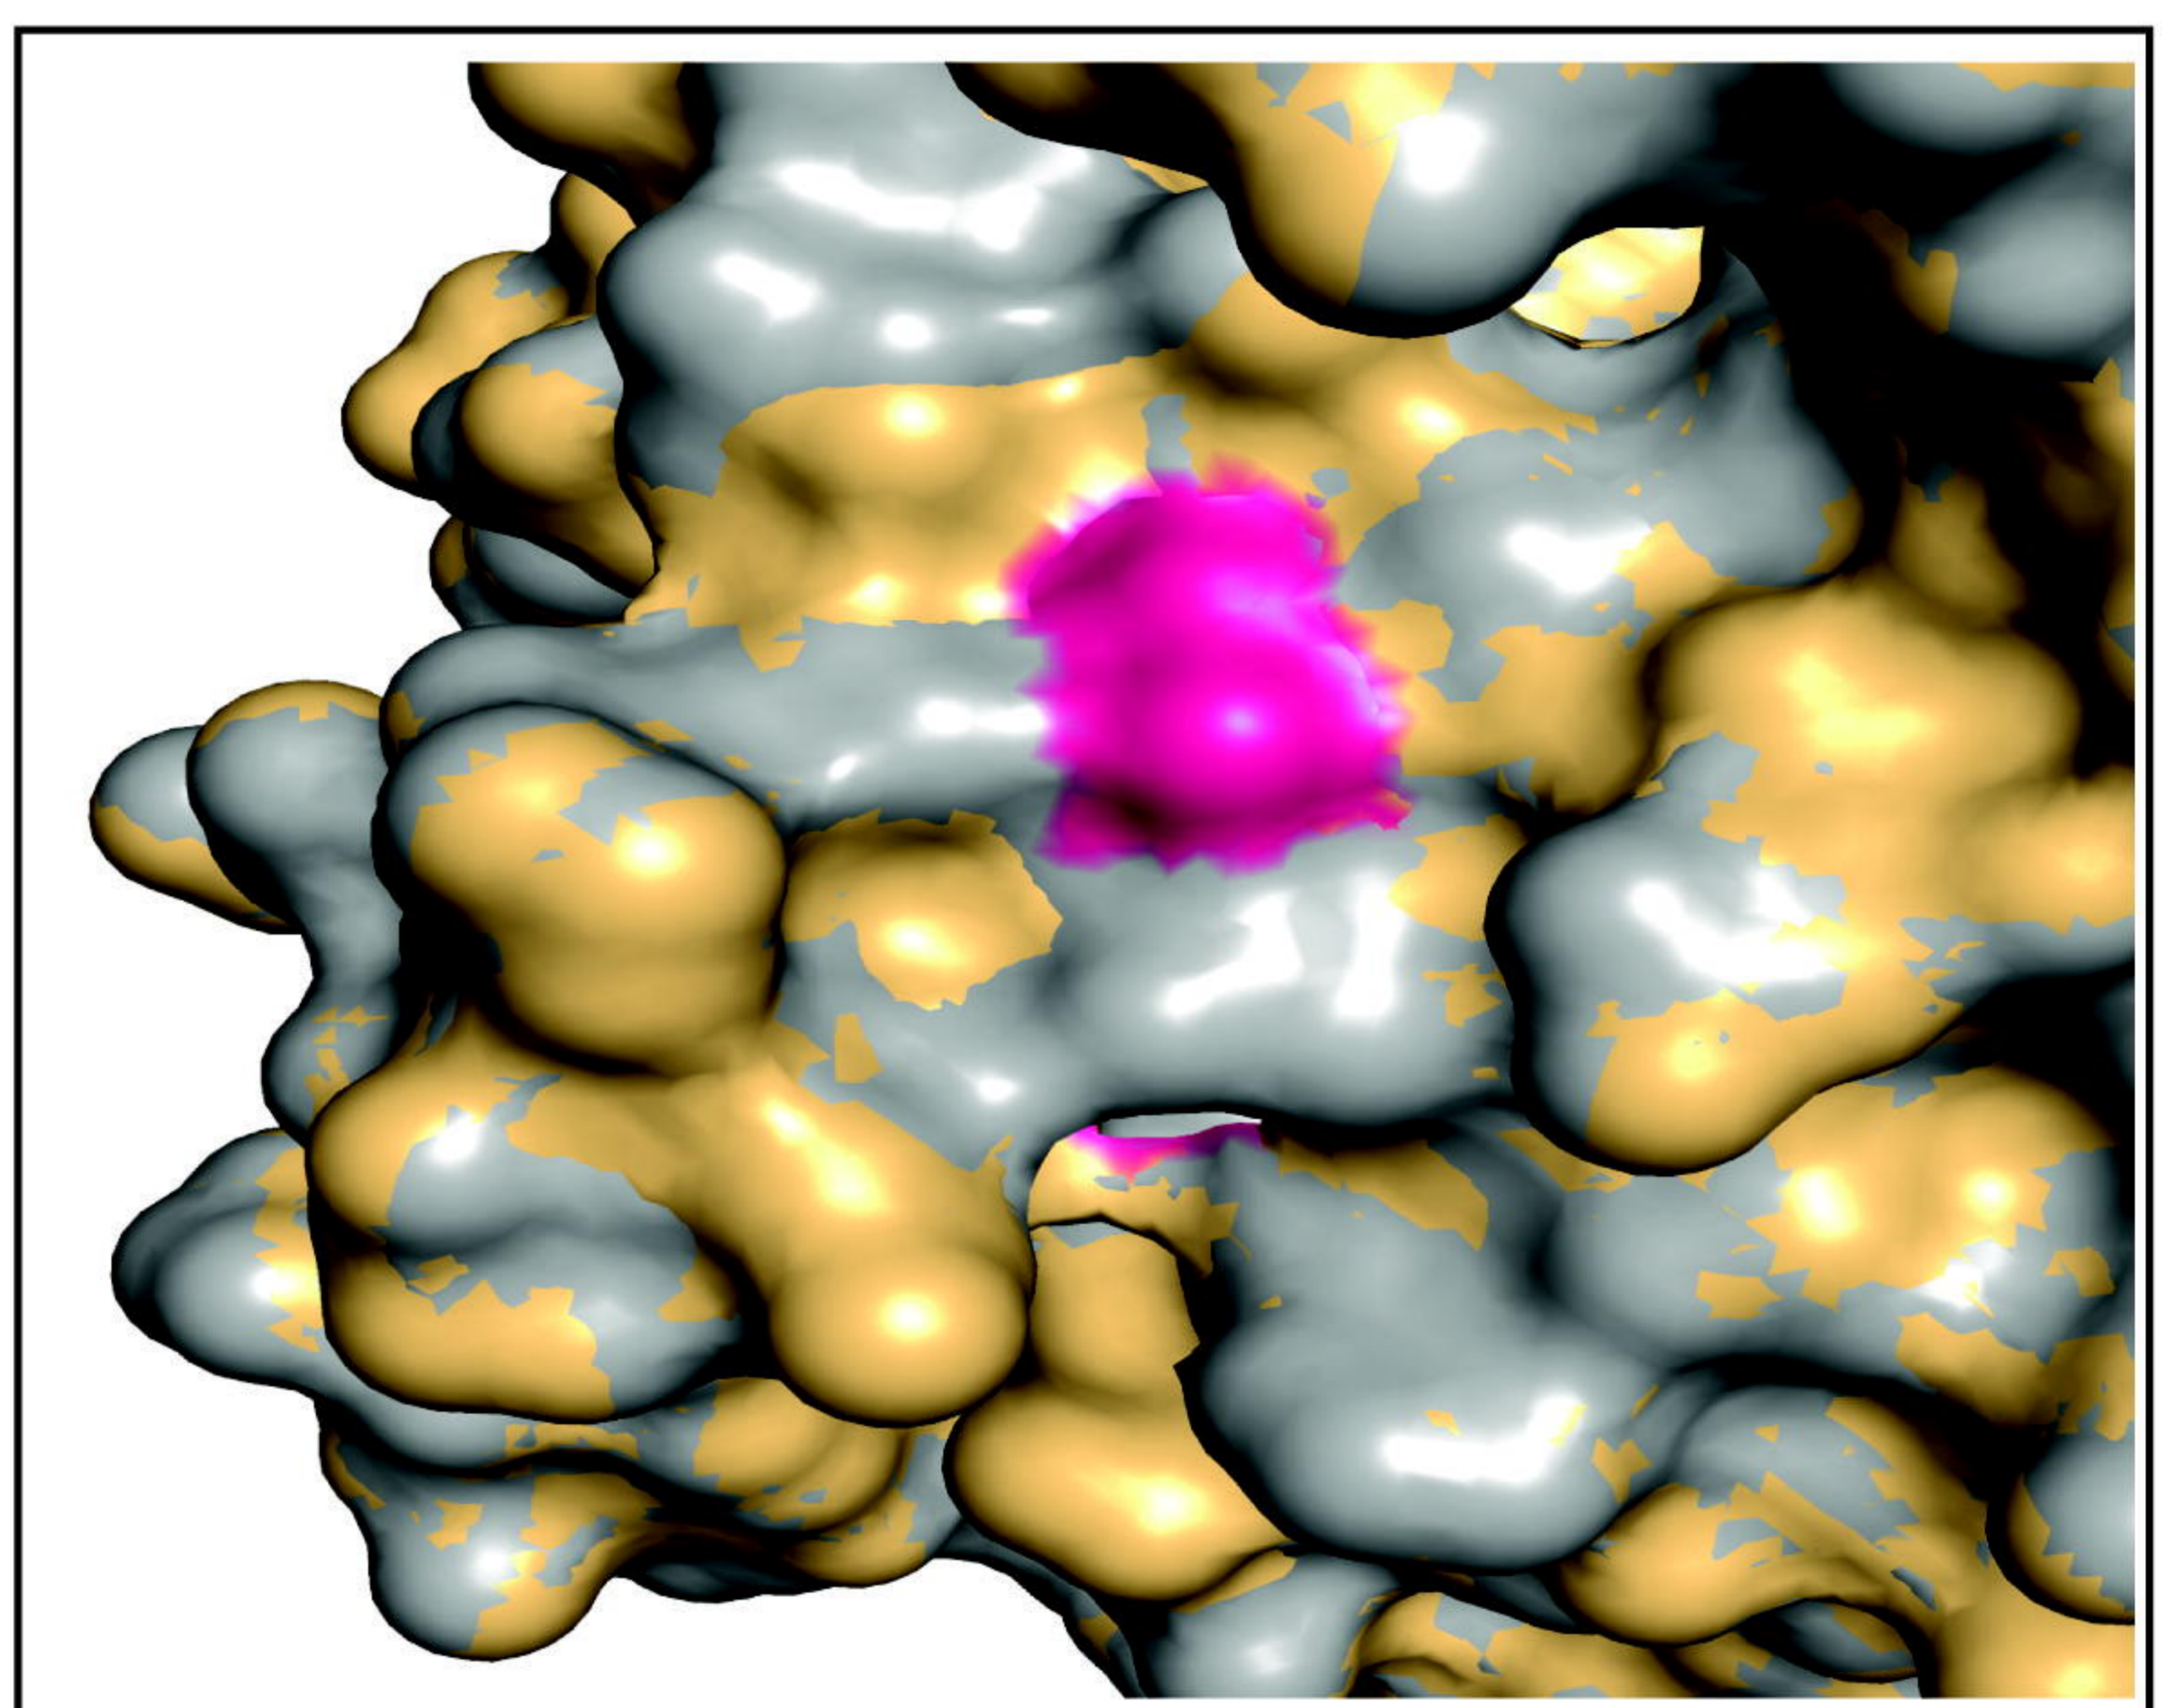

d

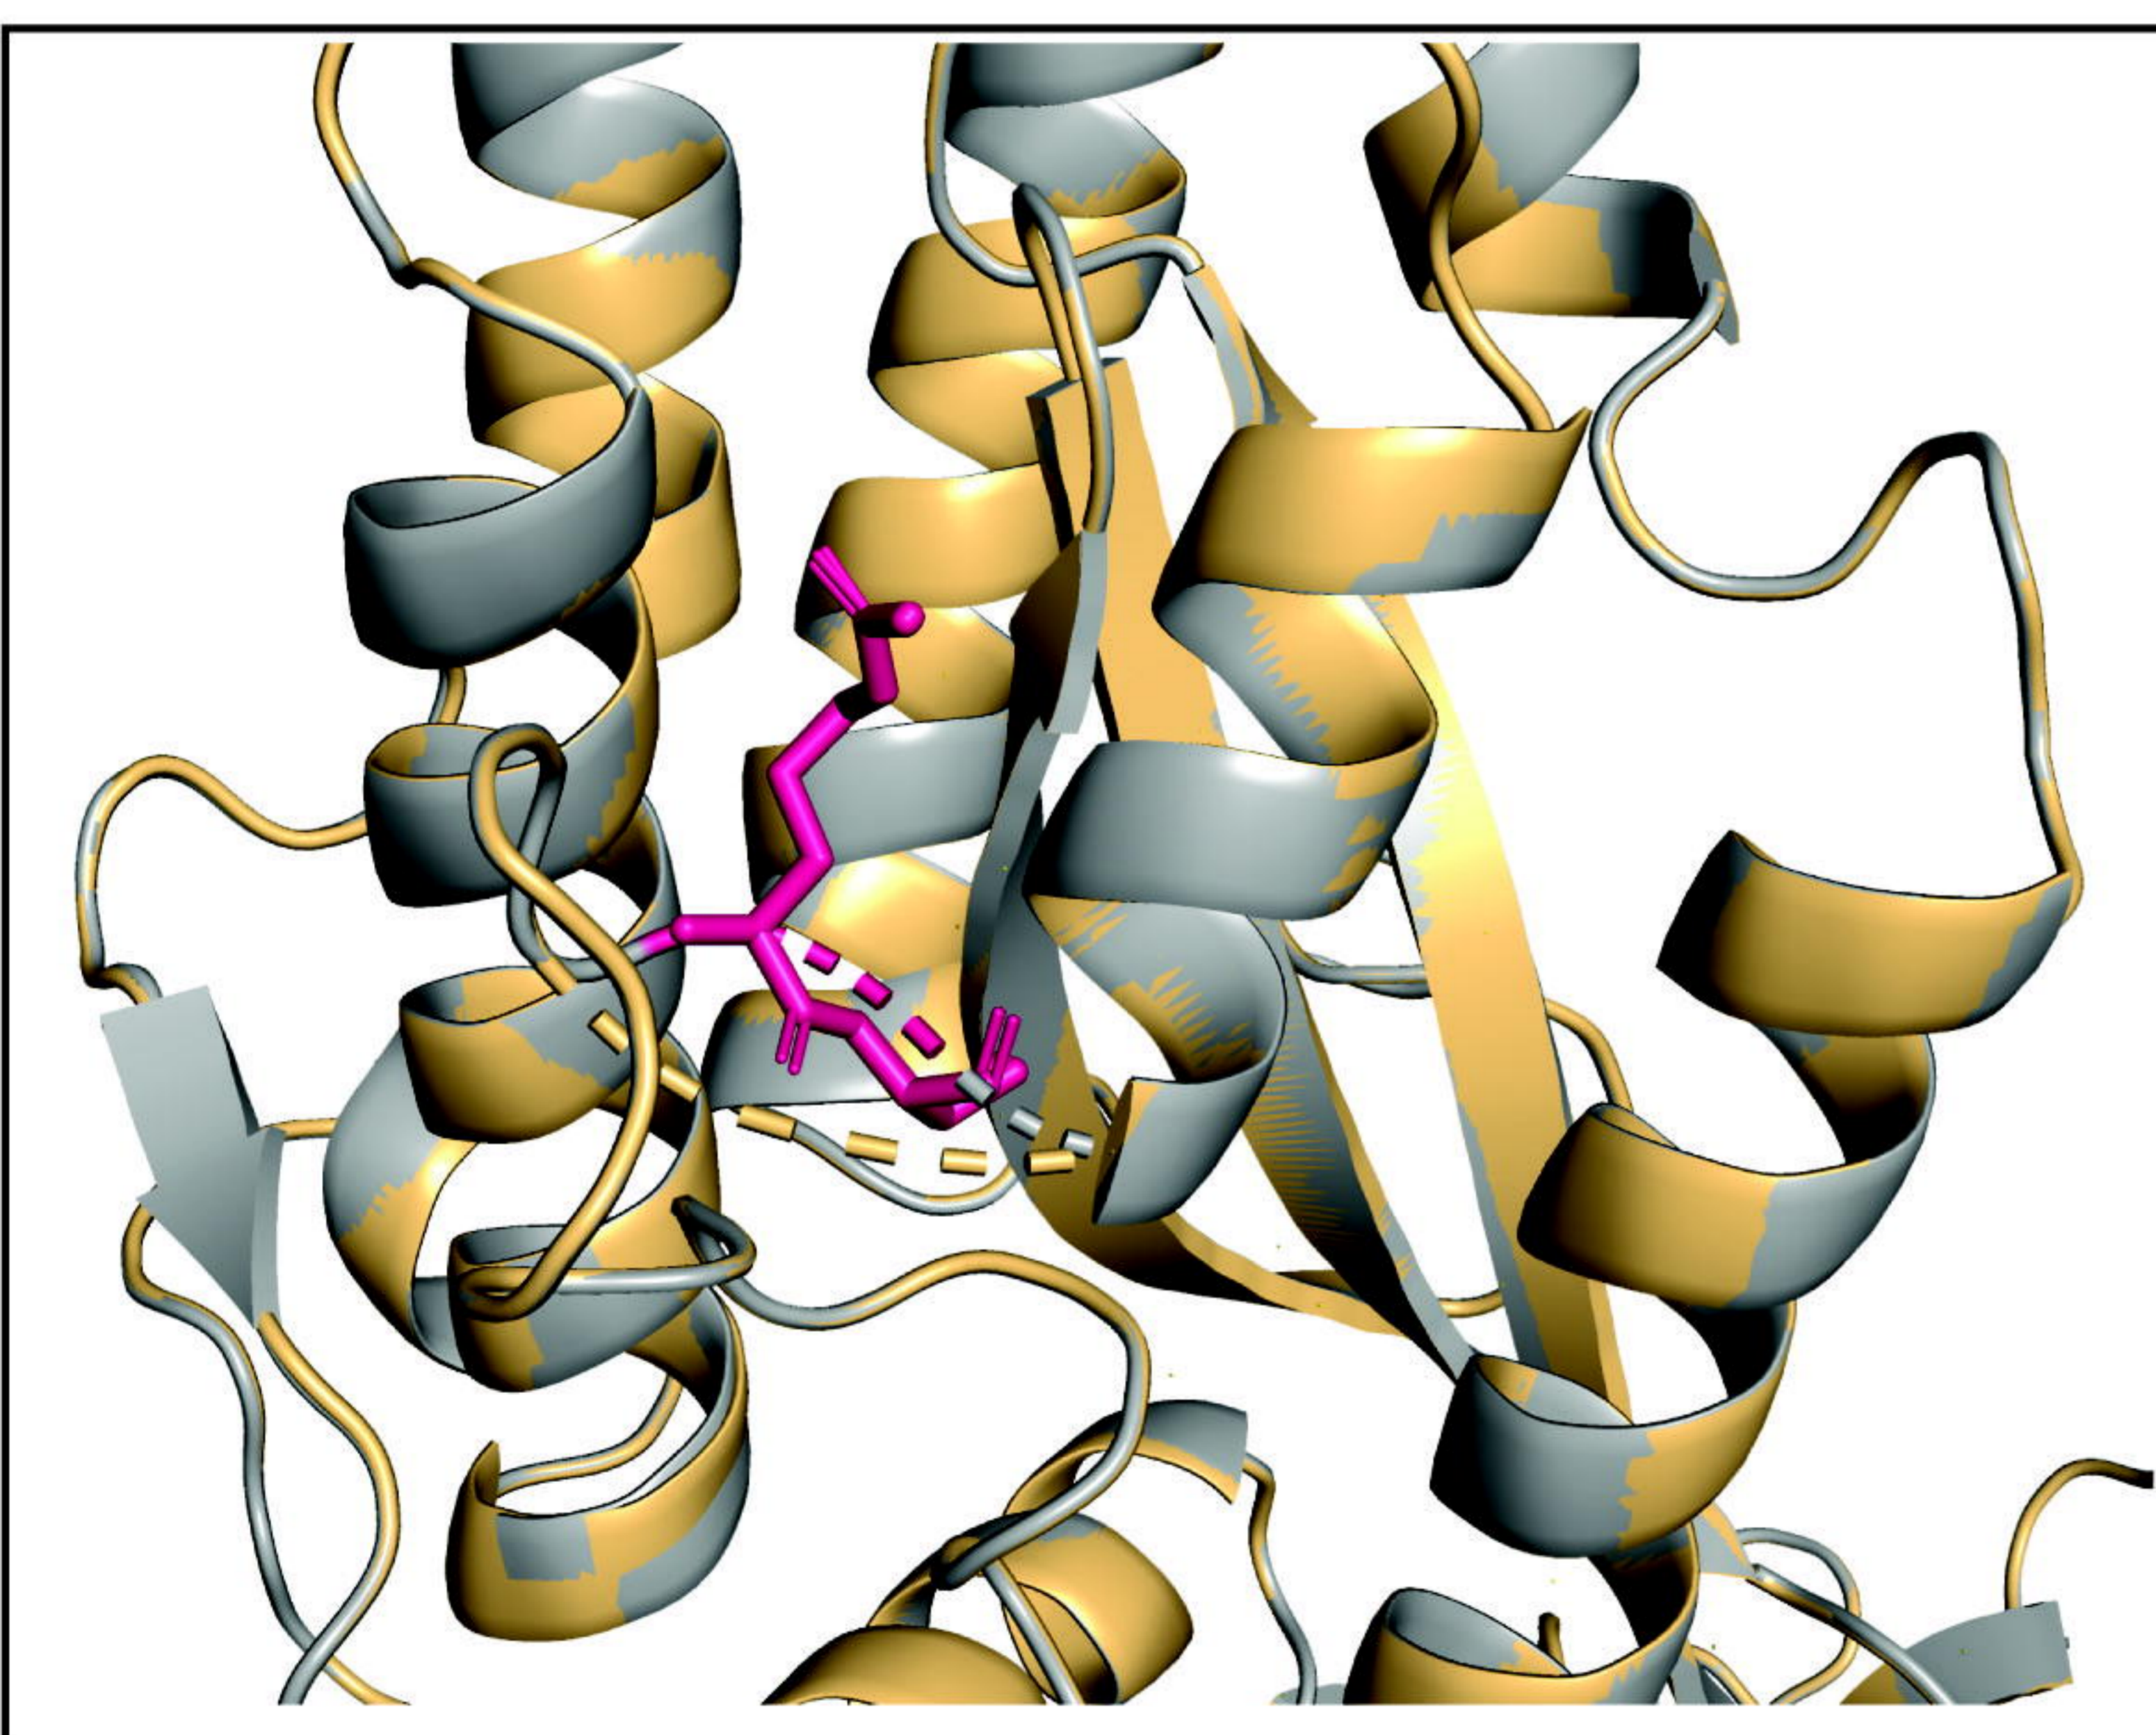

e

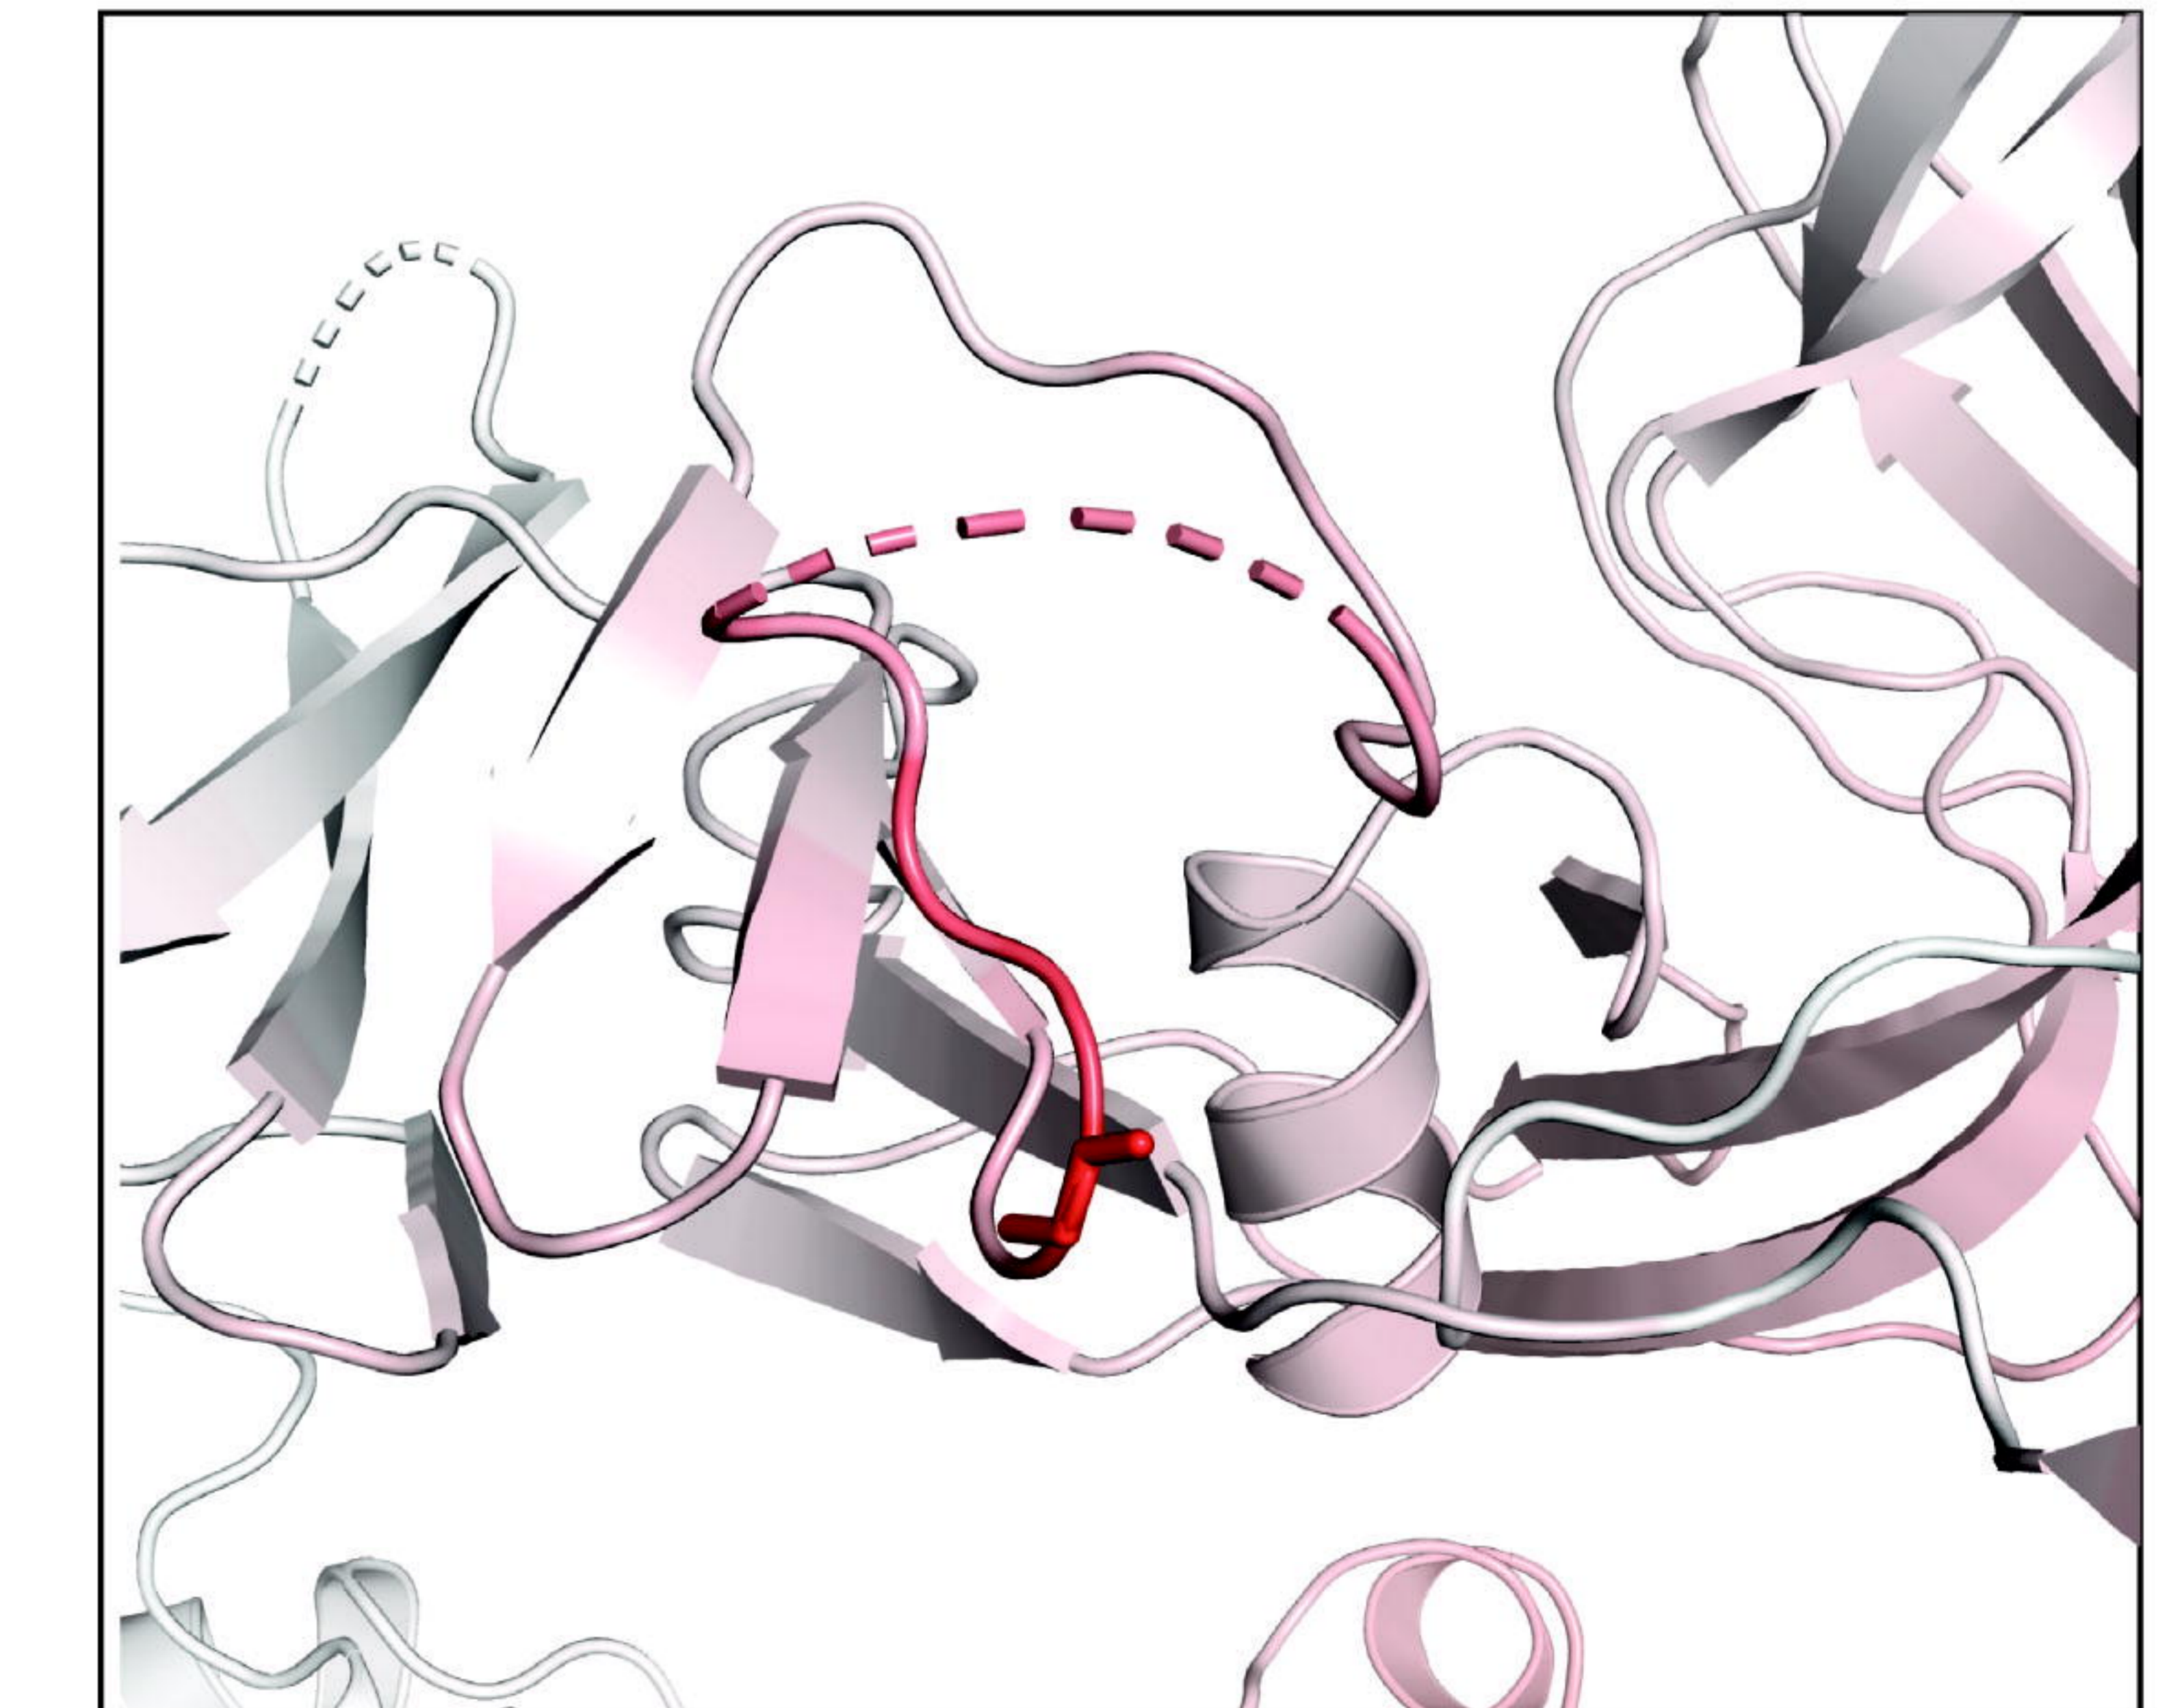

f

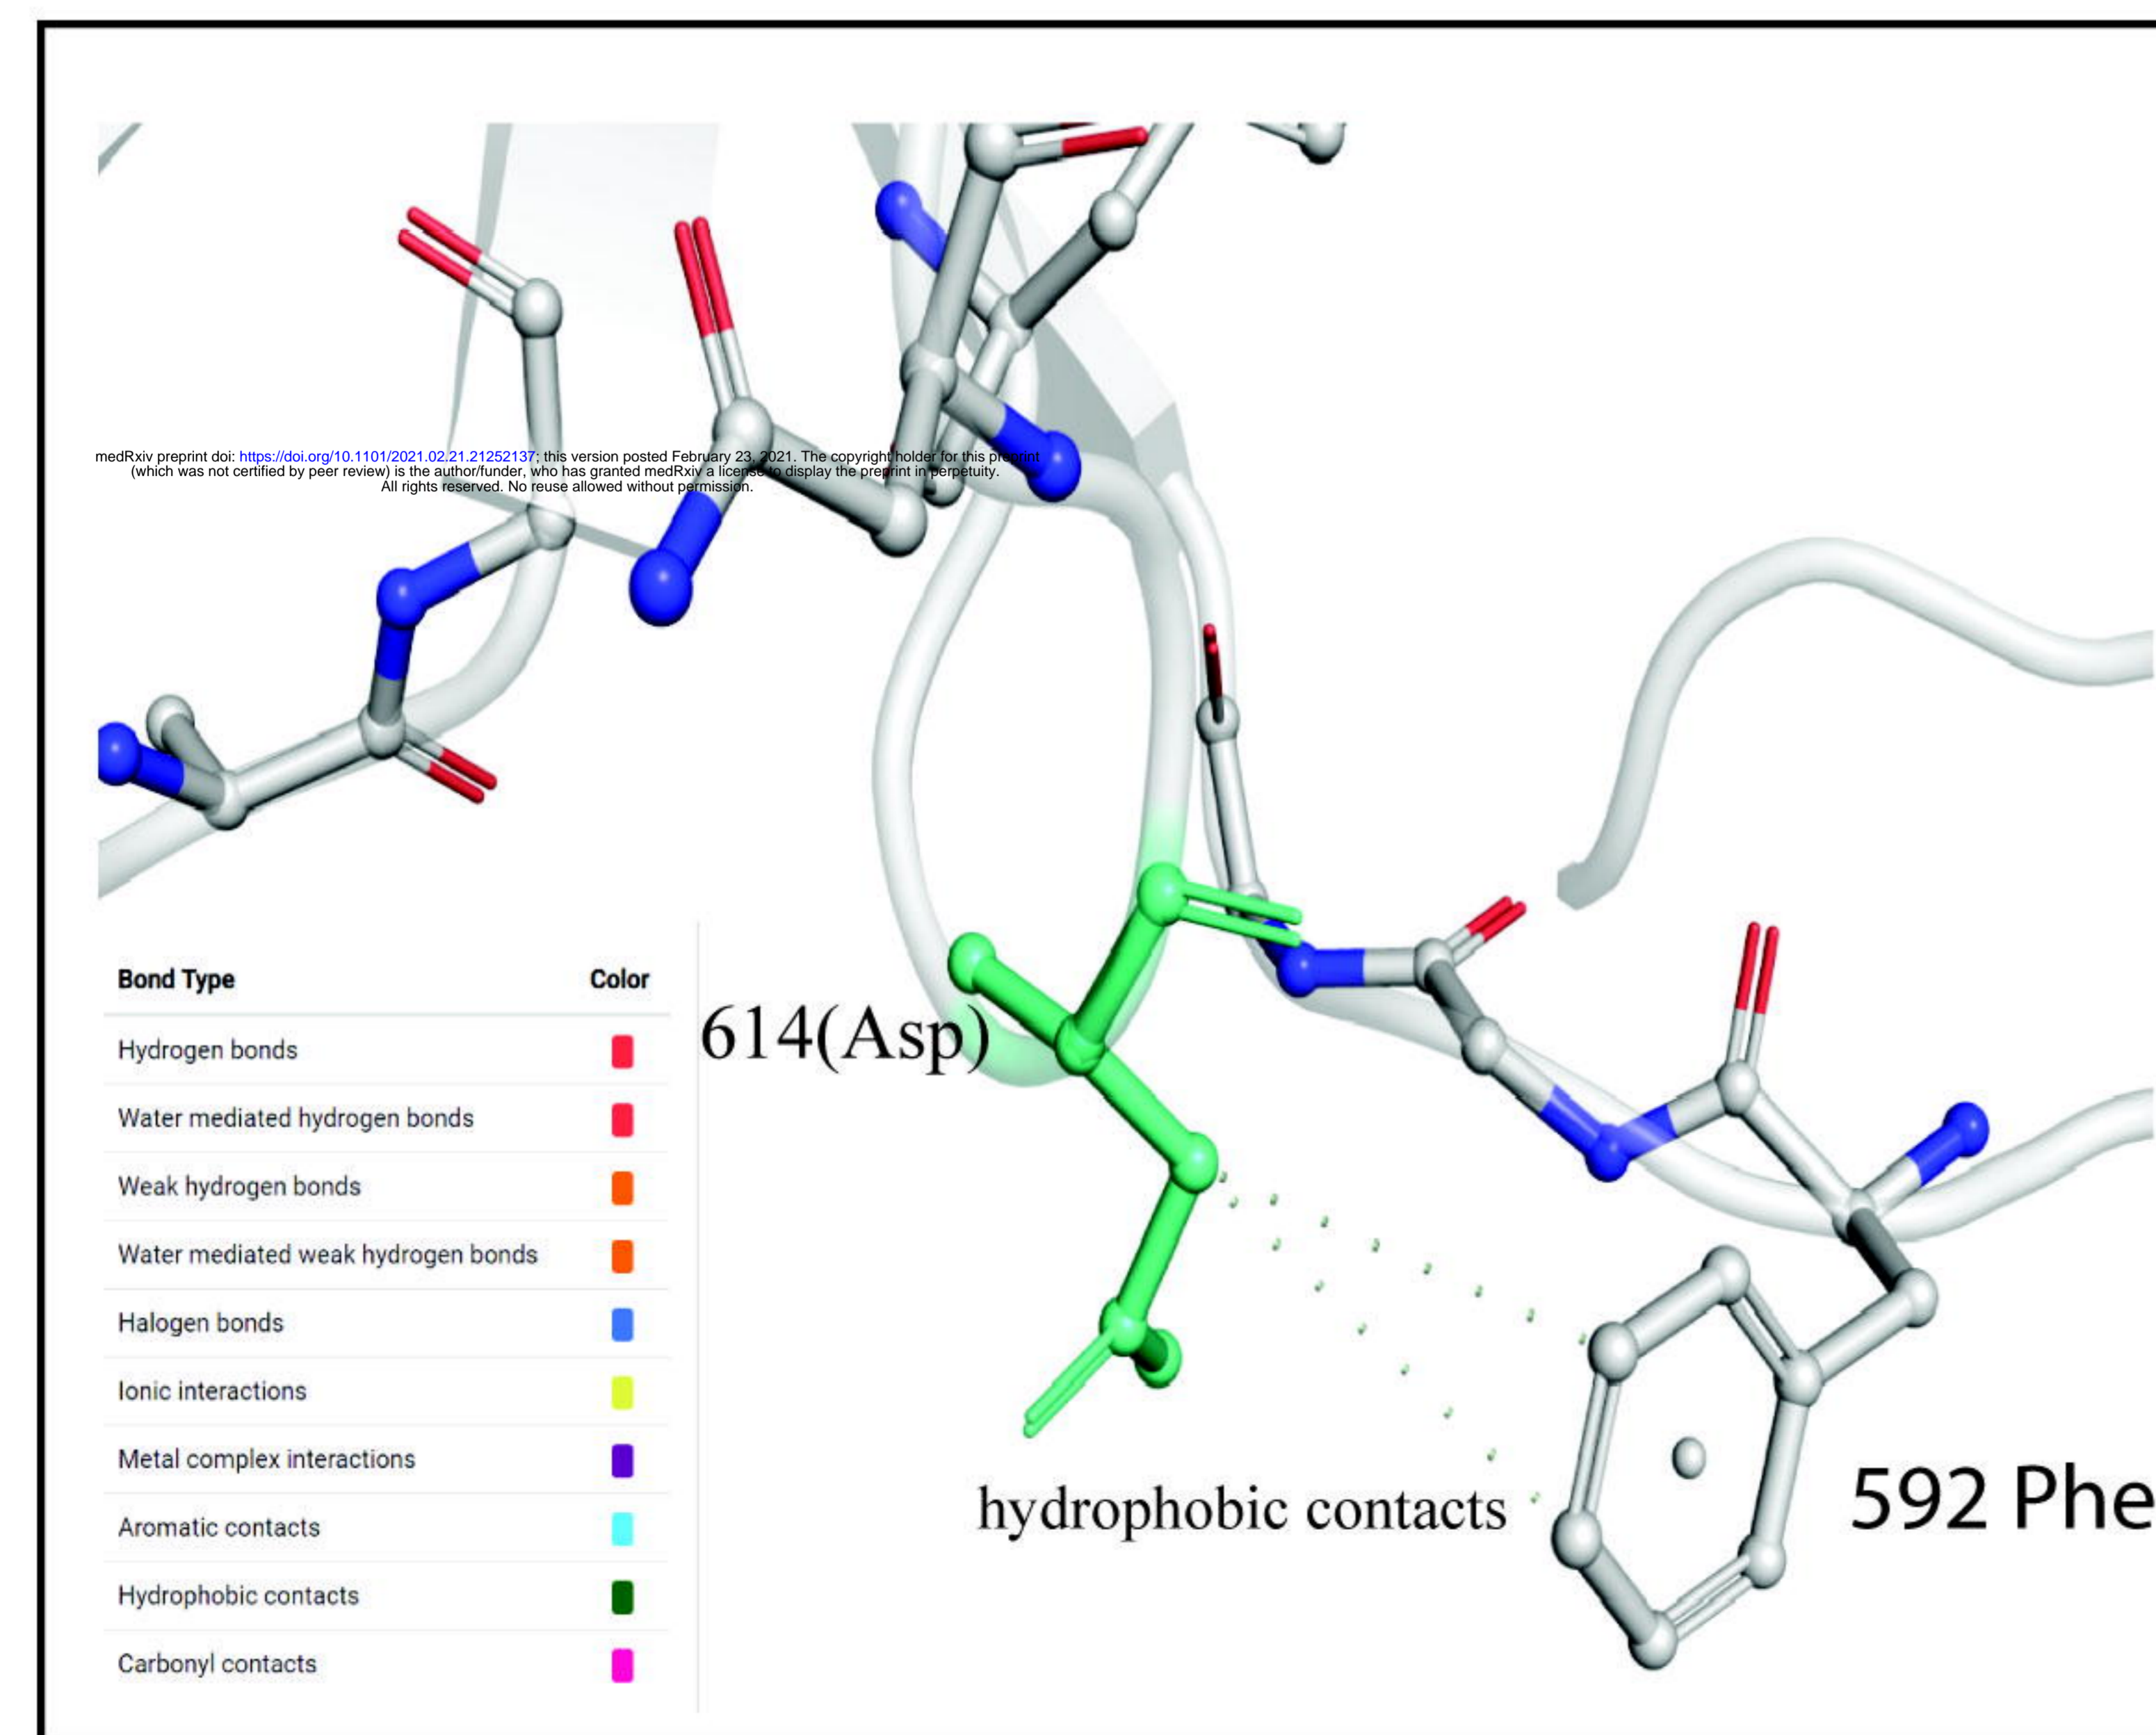

g

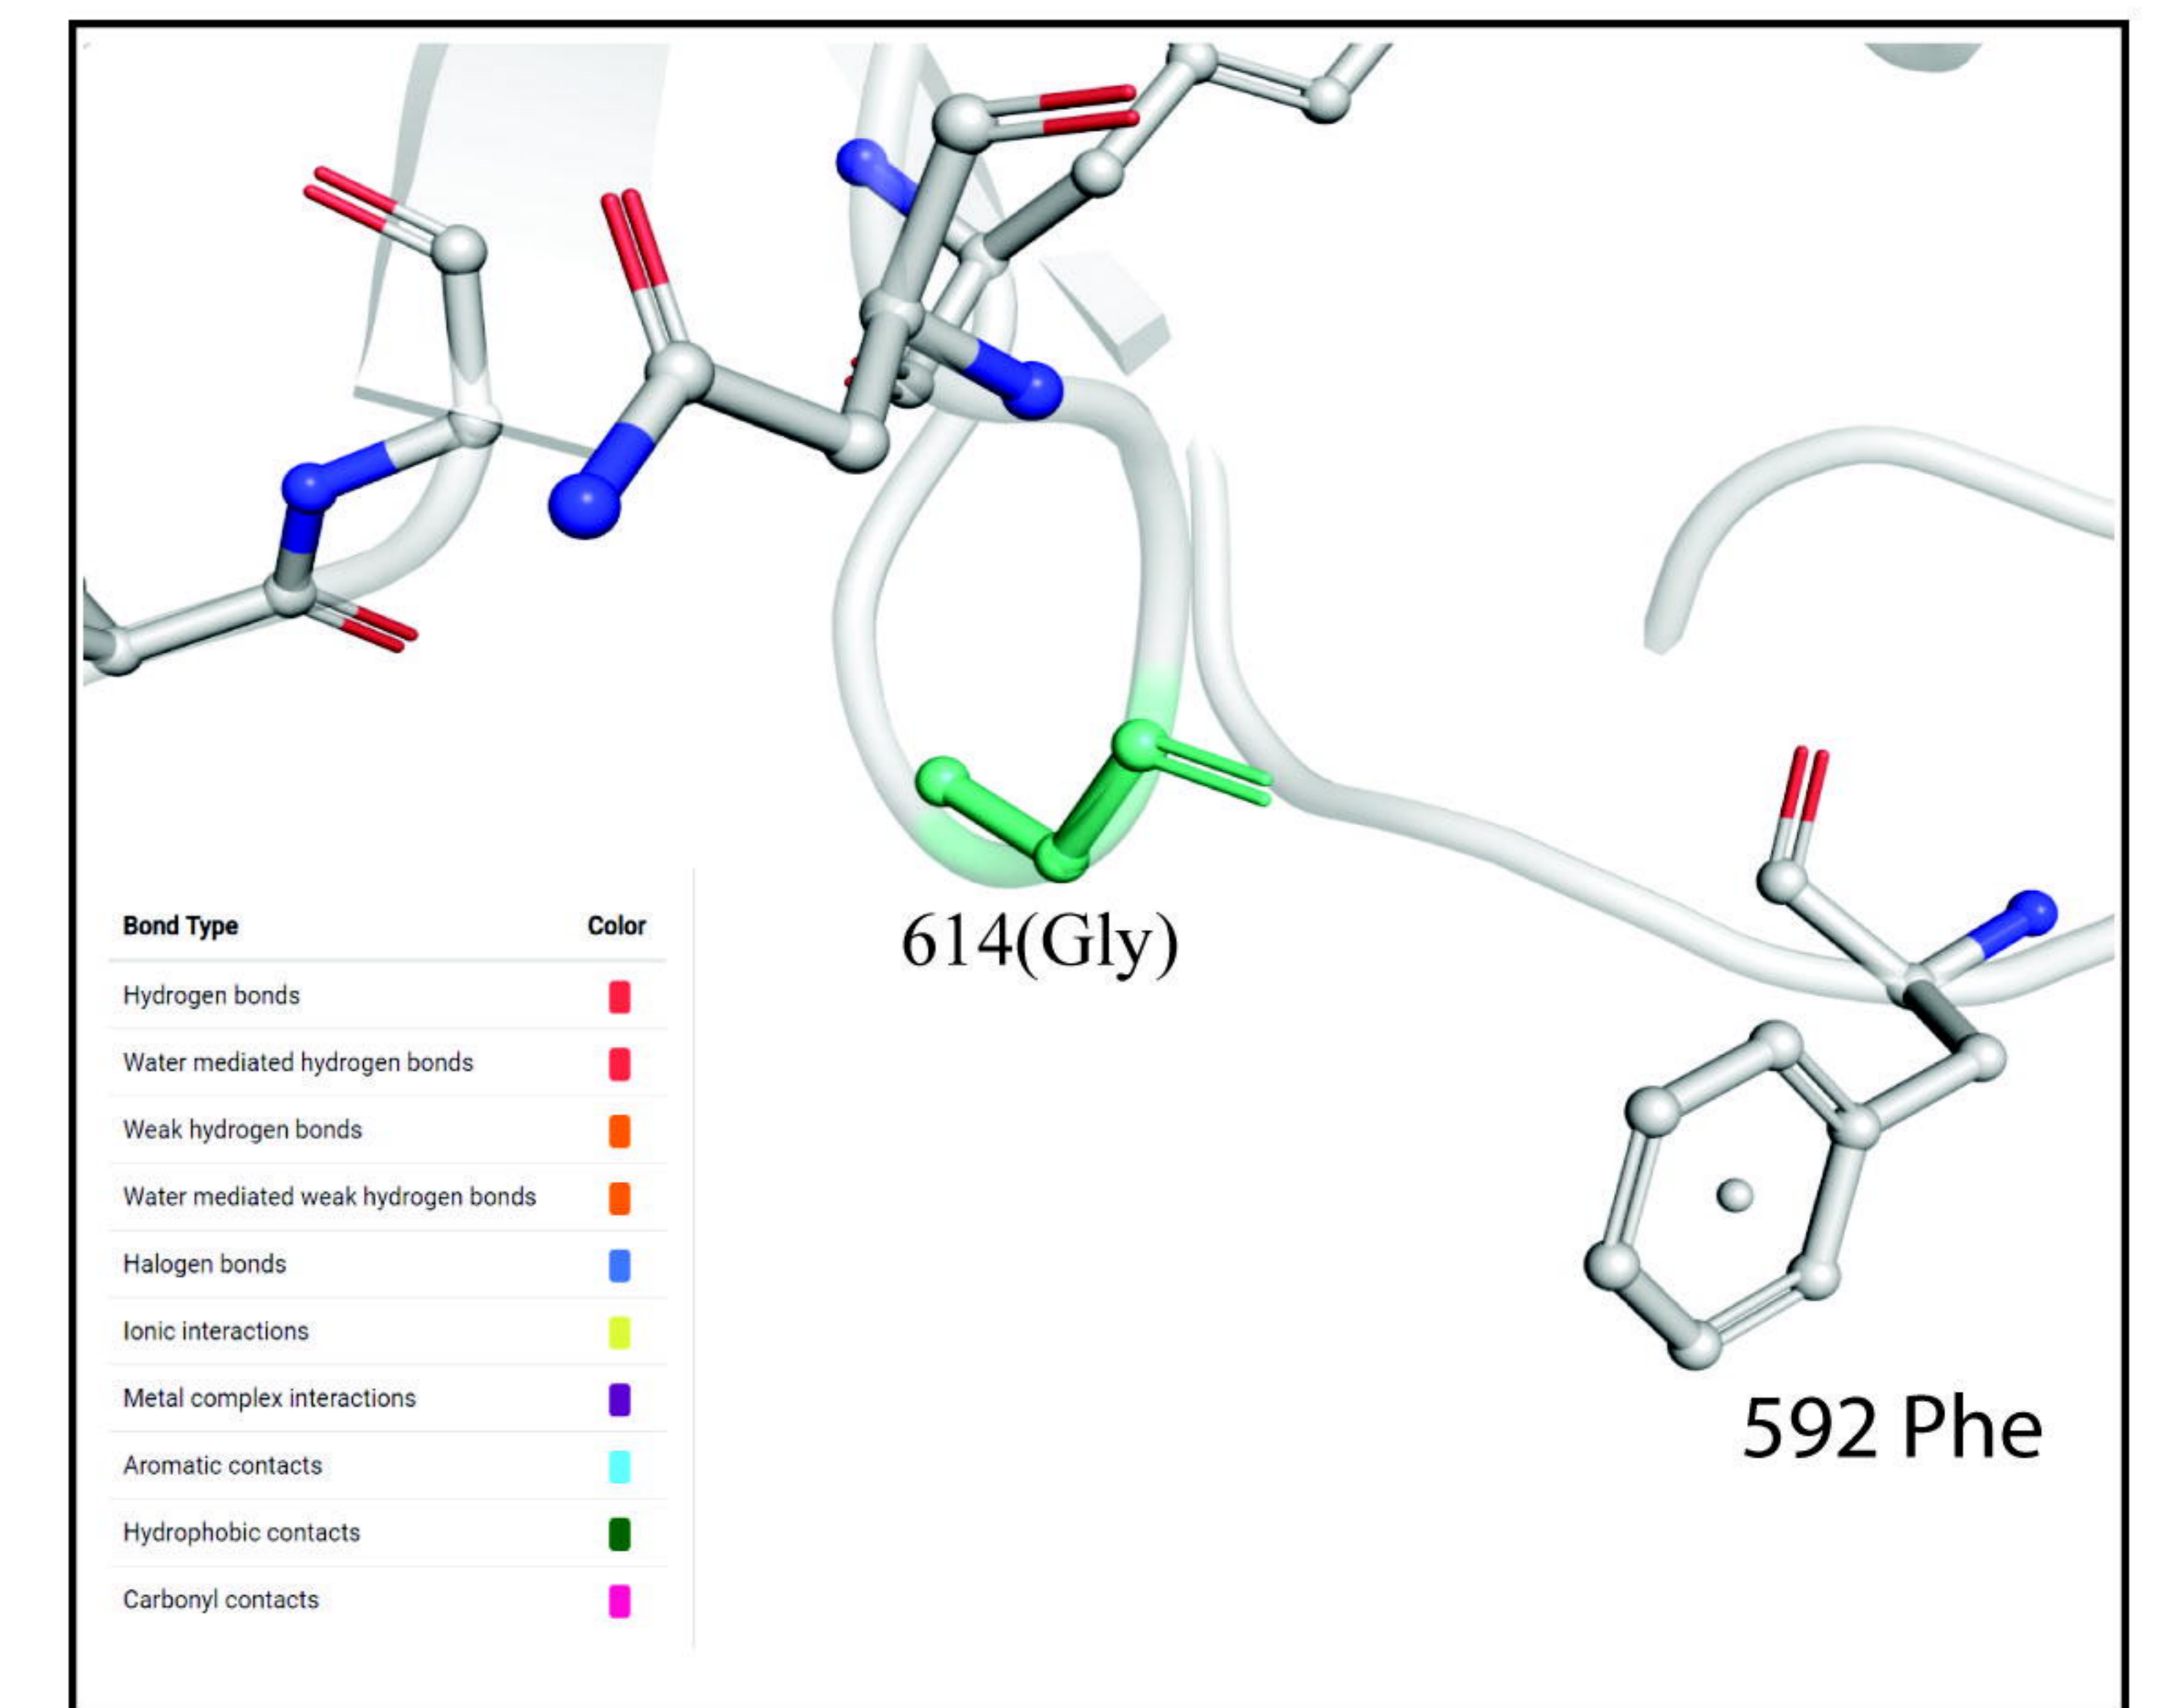

h



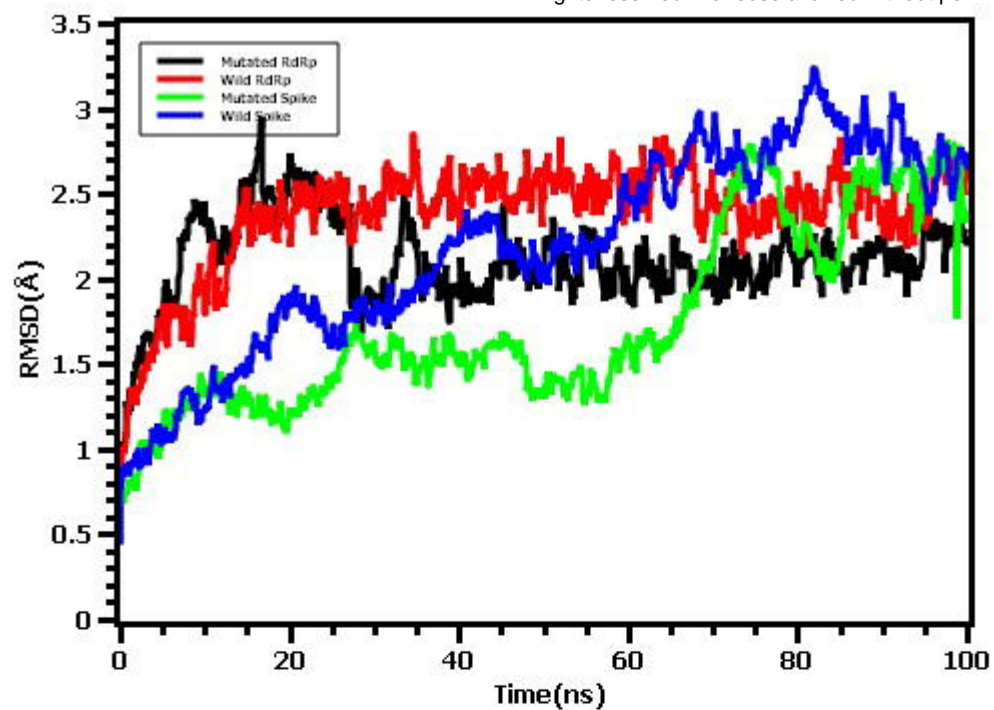

(a)

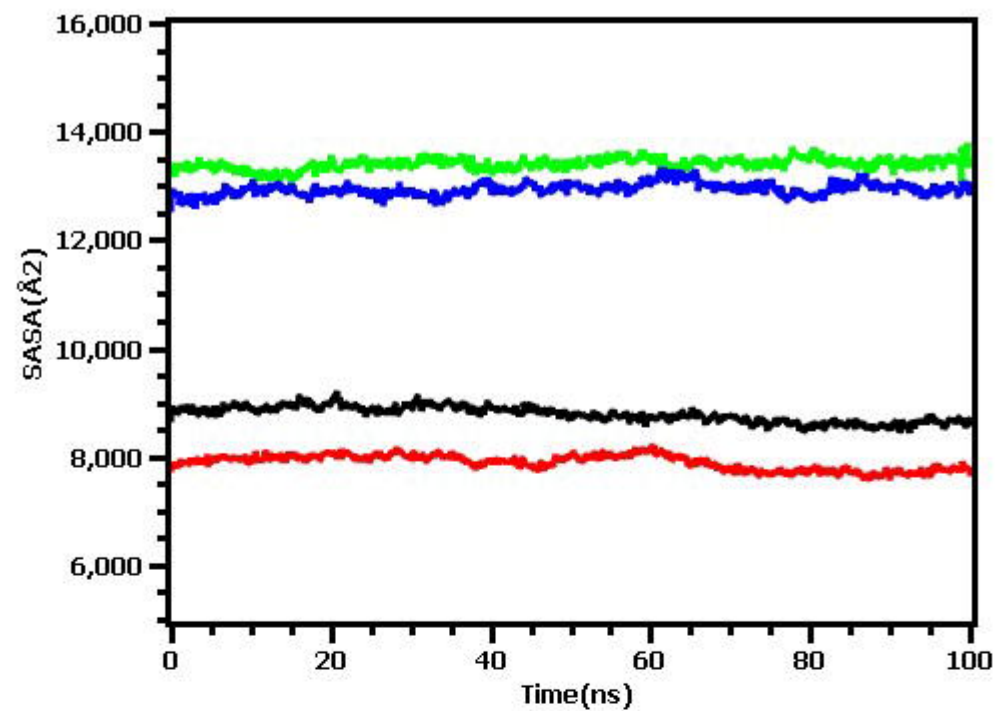

(b)

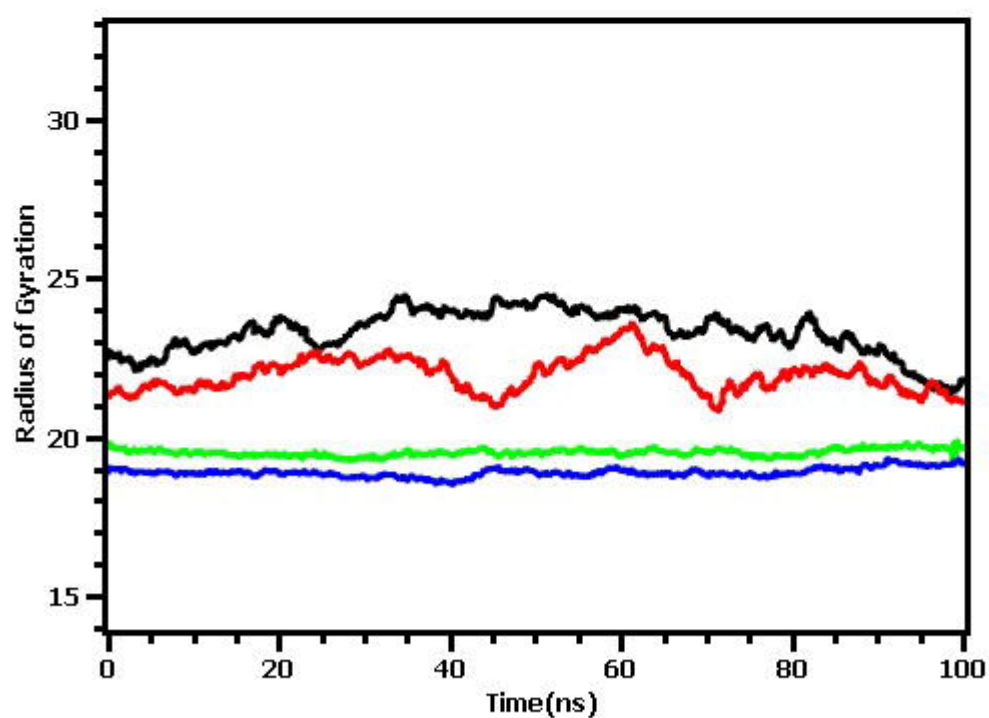

(c)

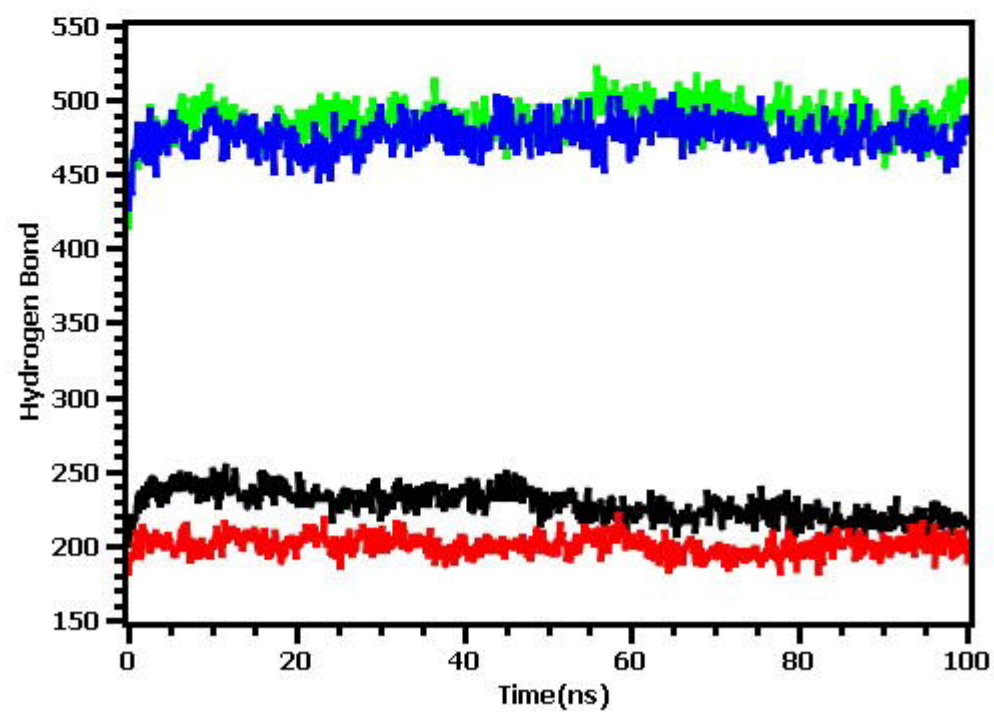

(d)



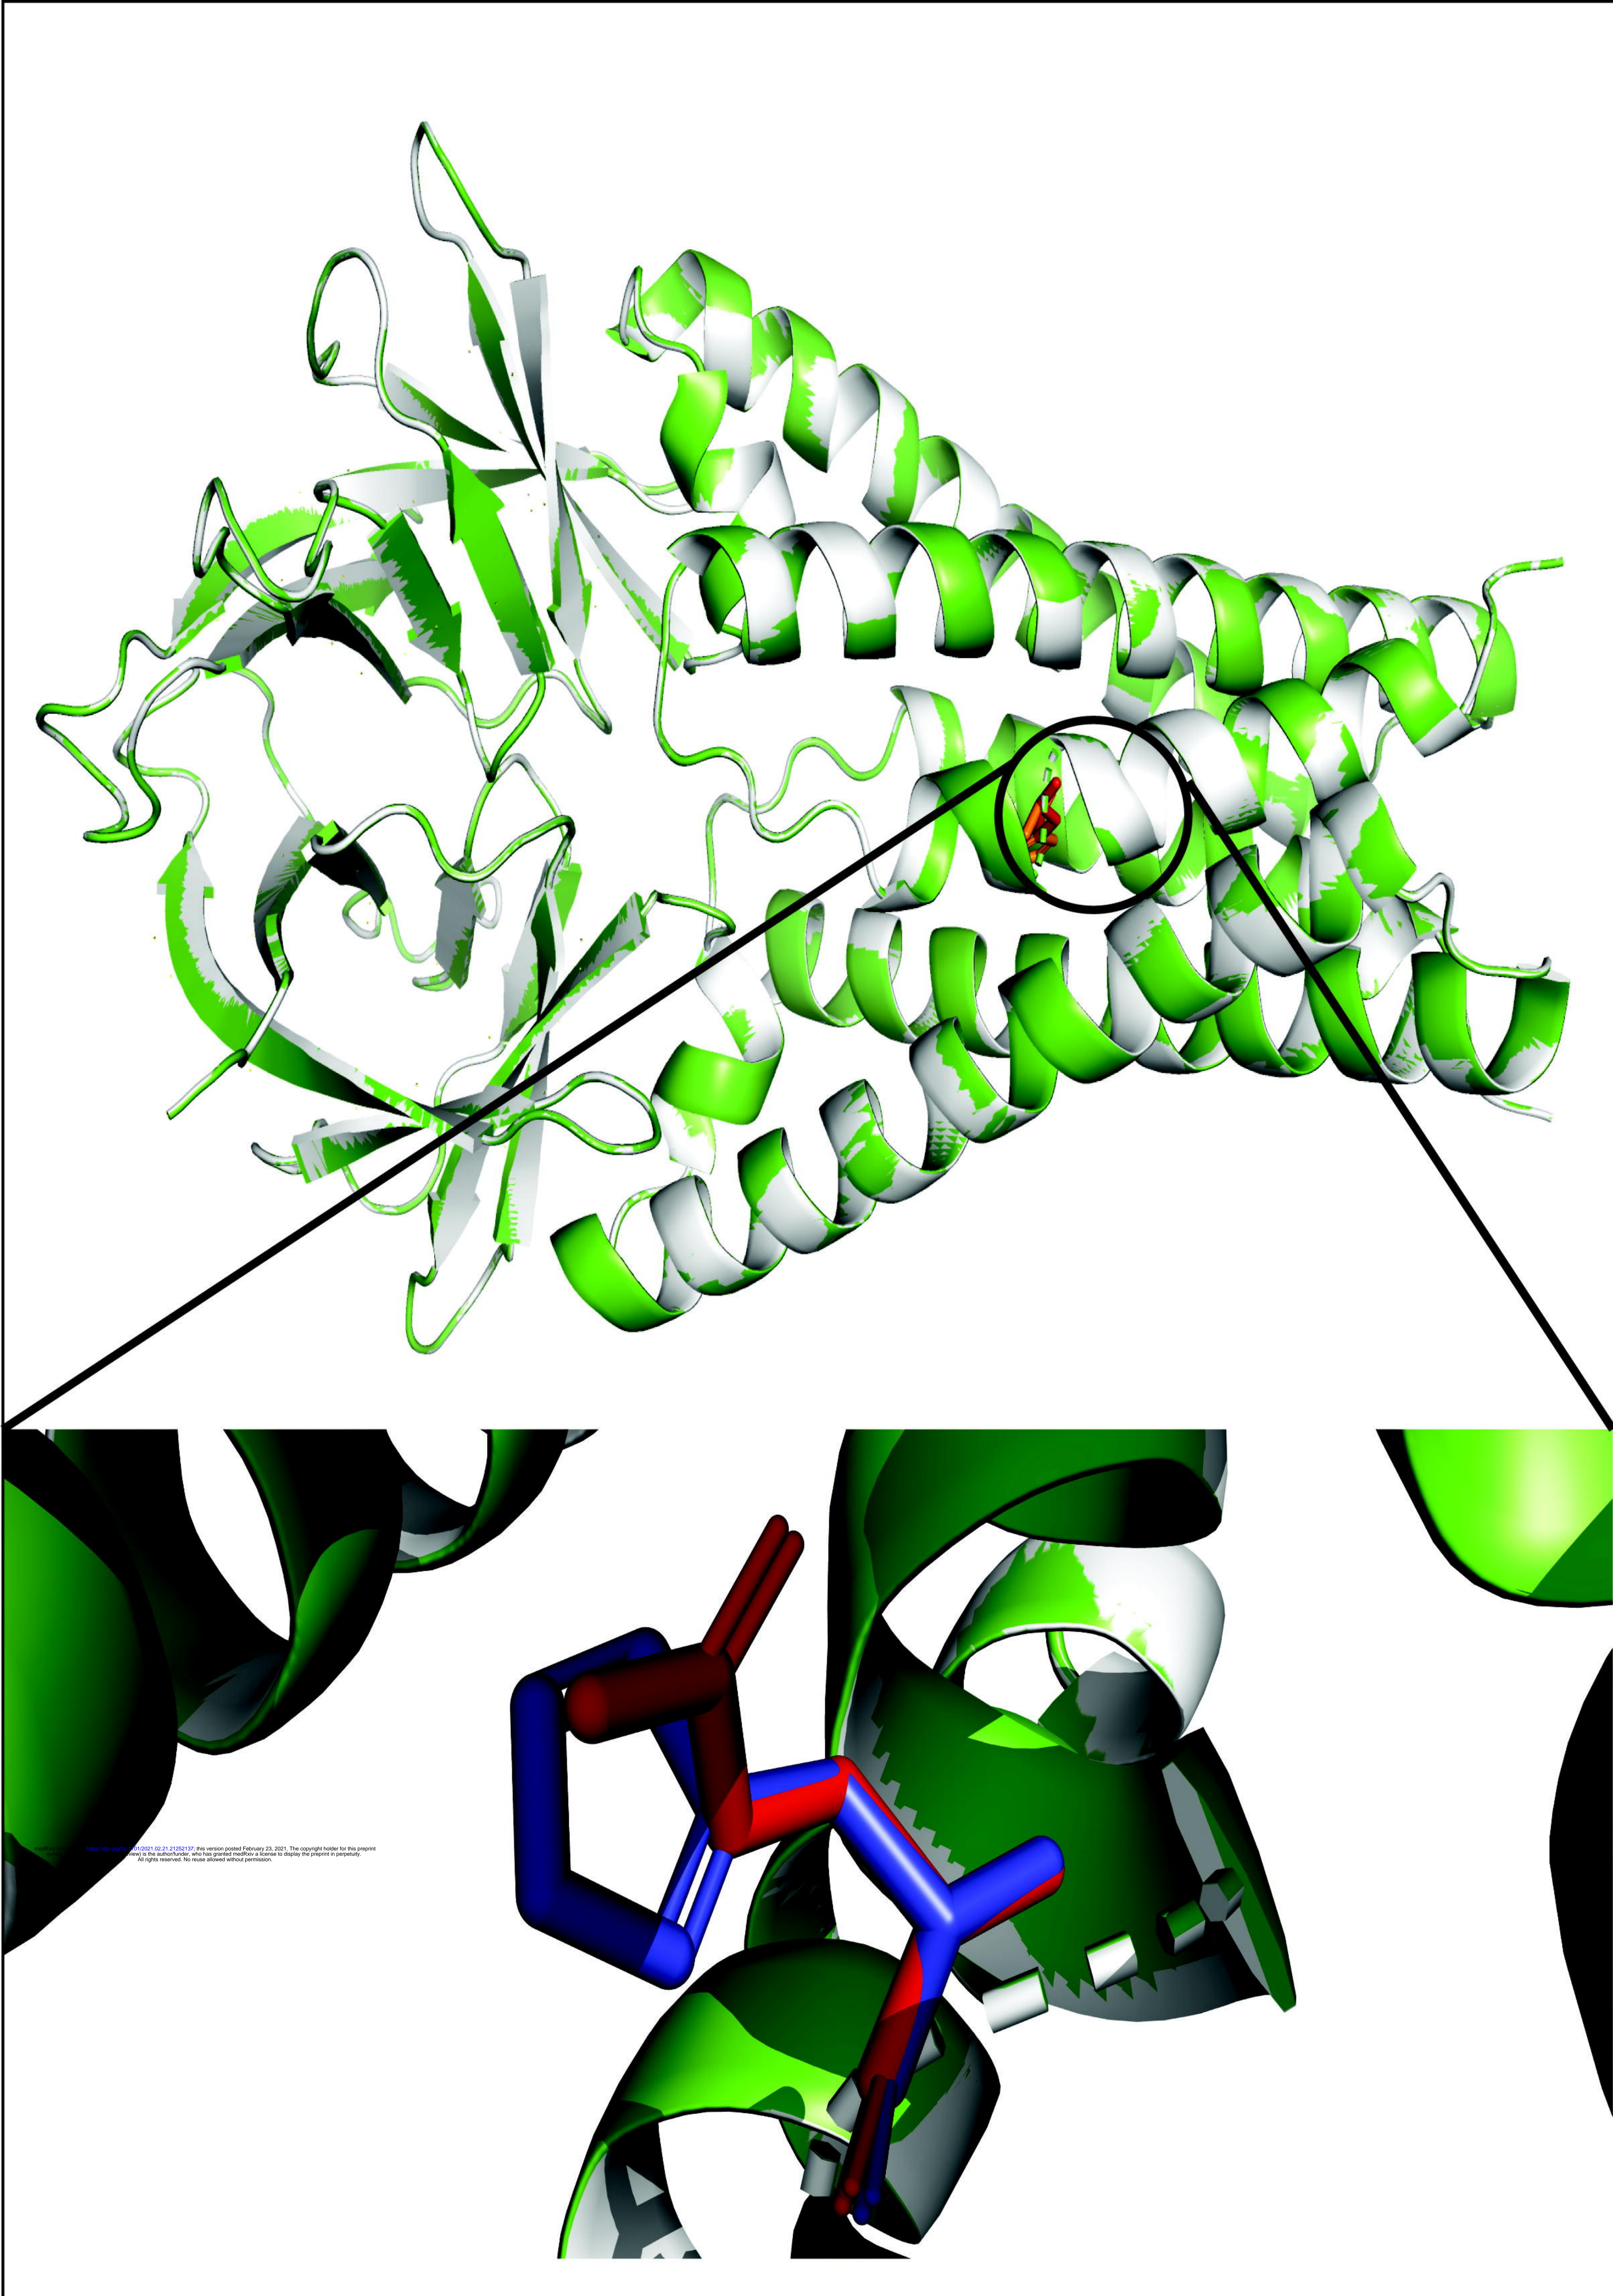

a

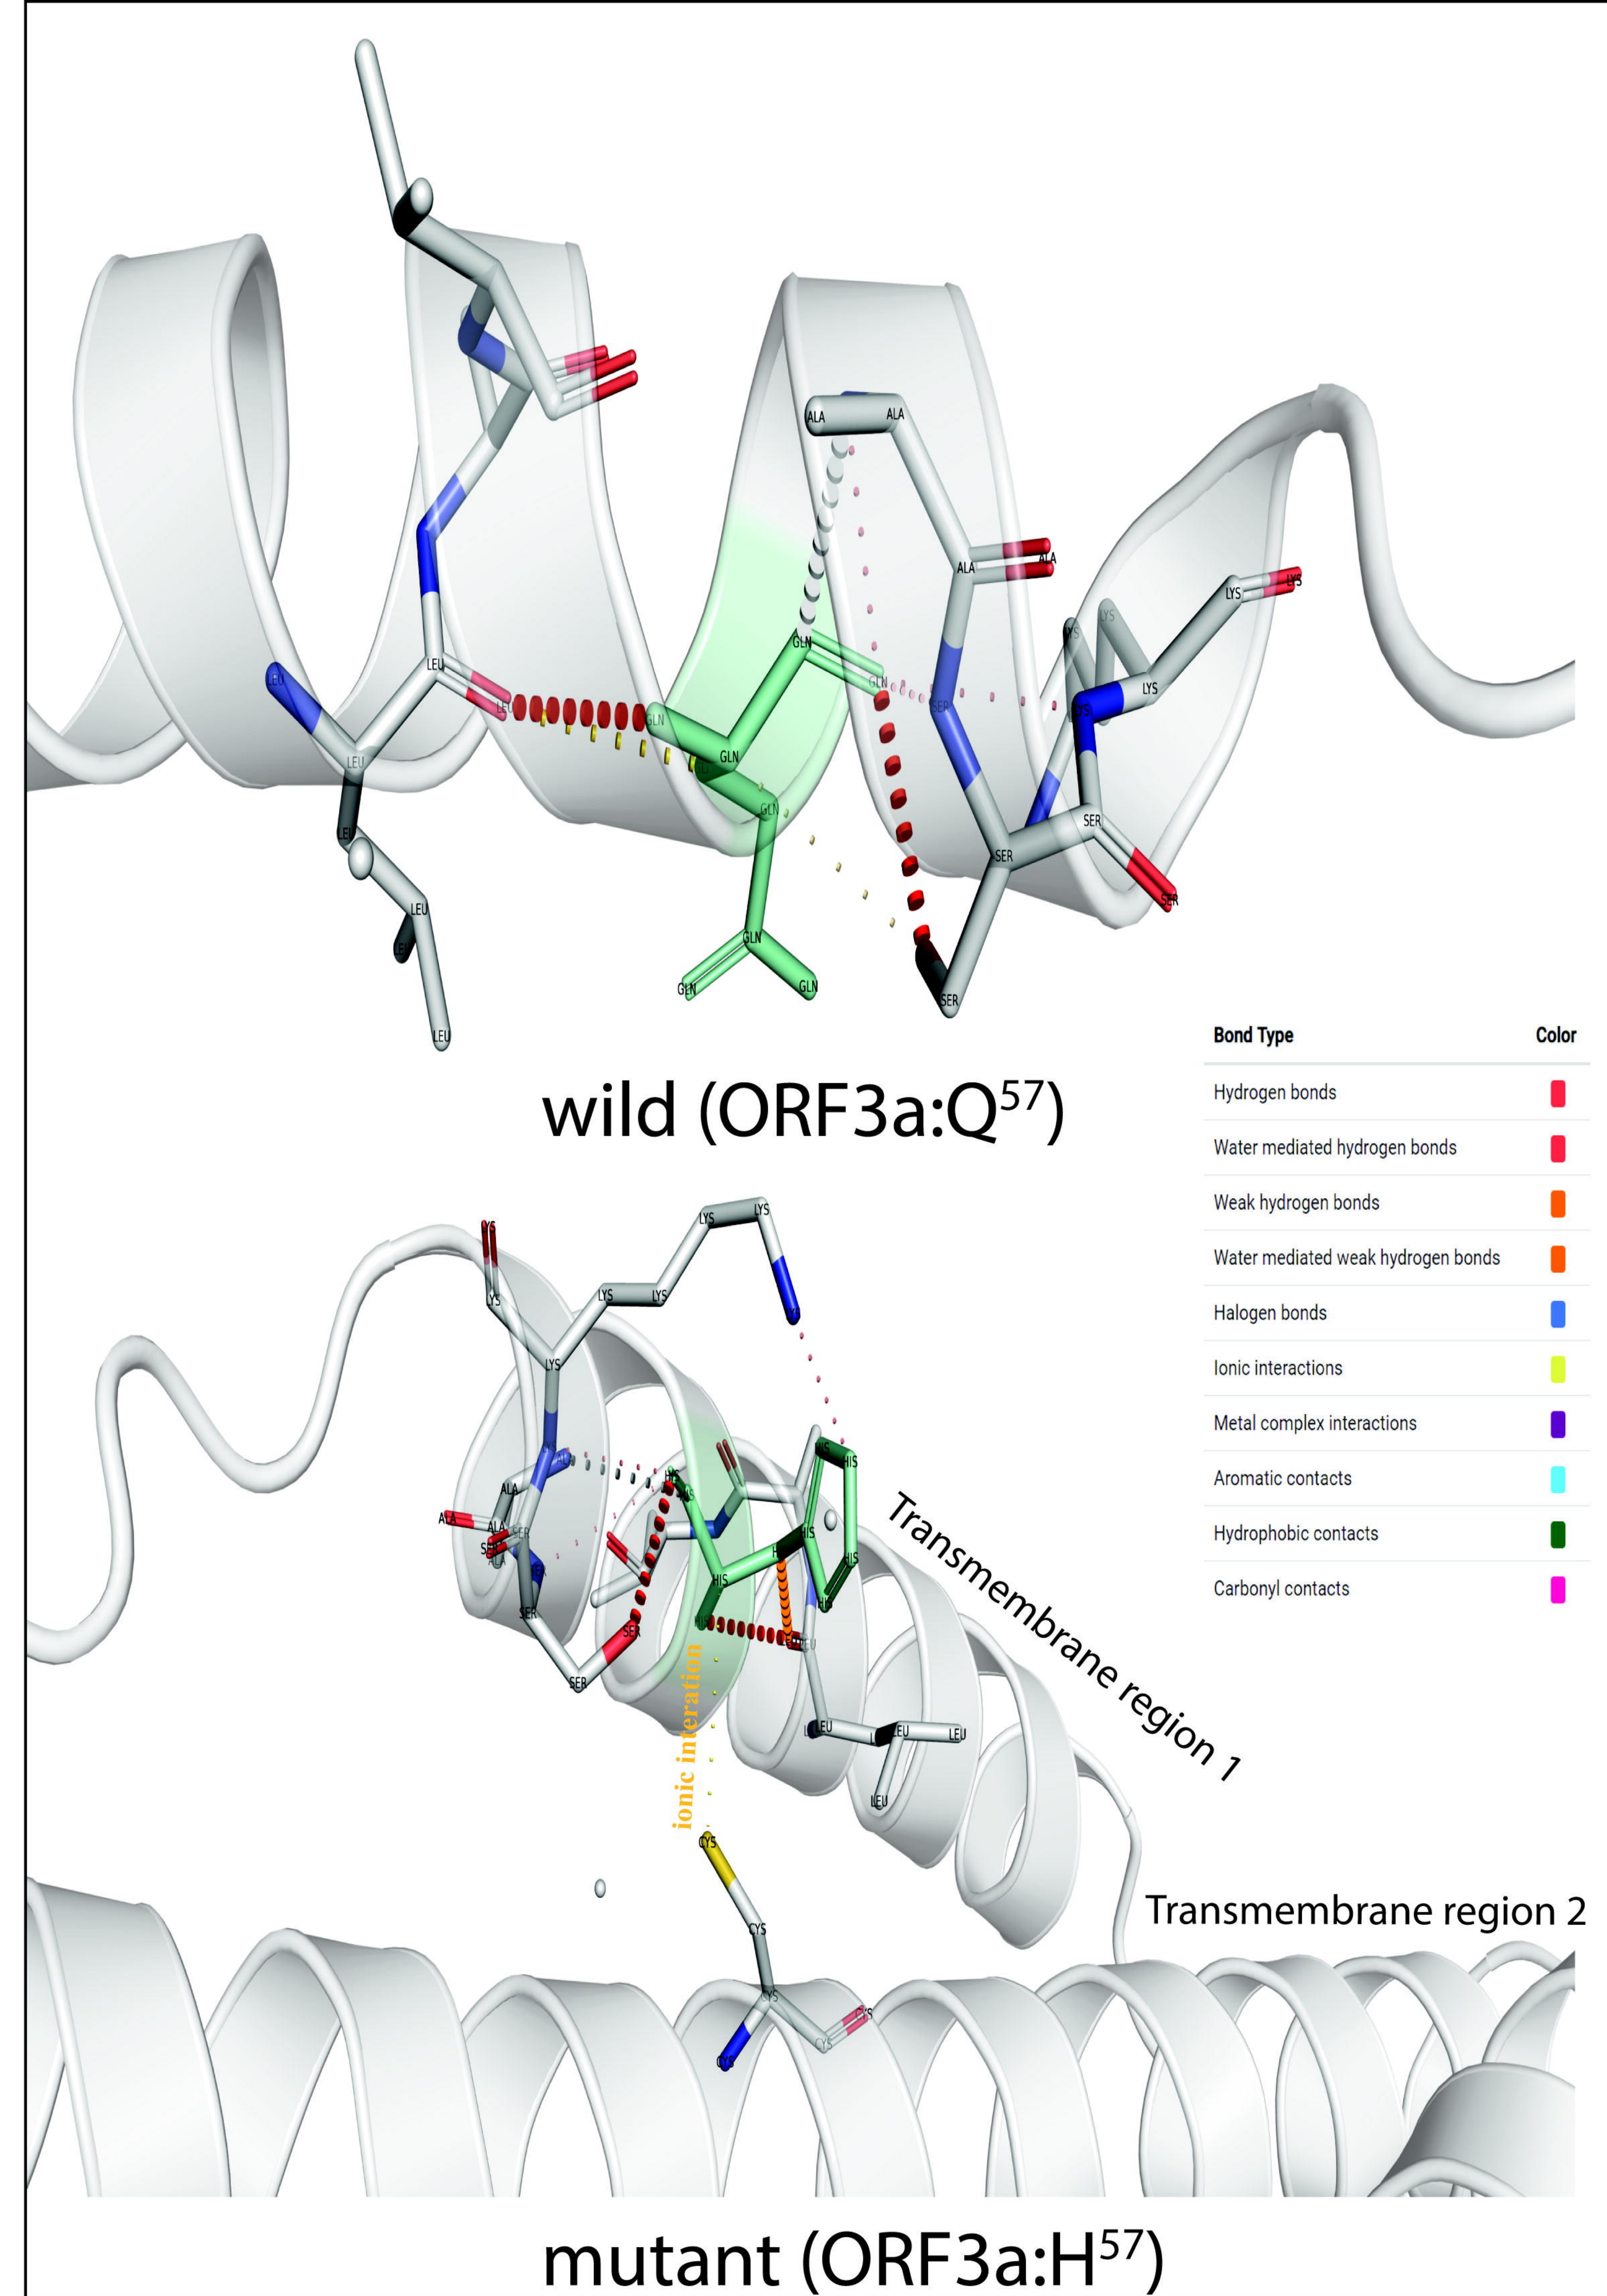

b

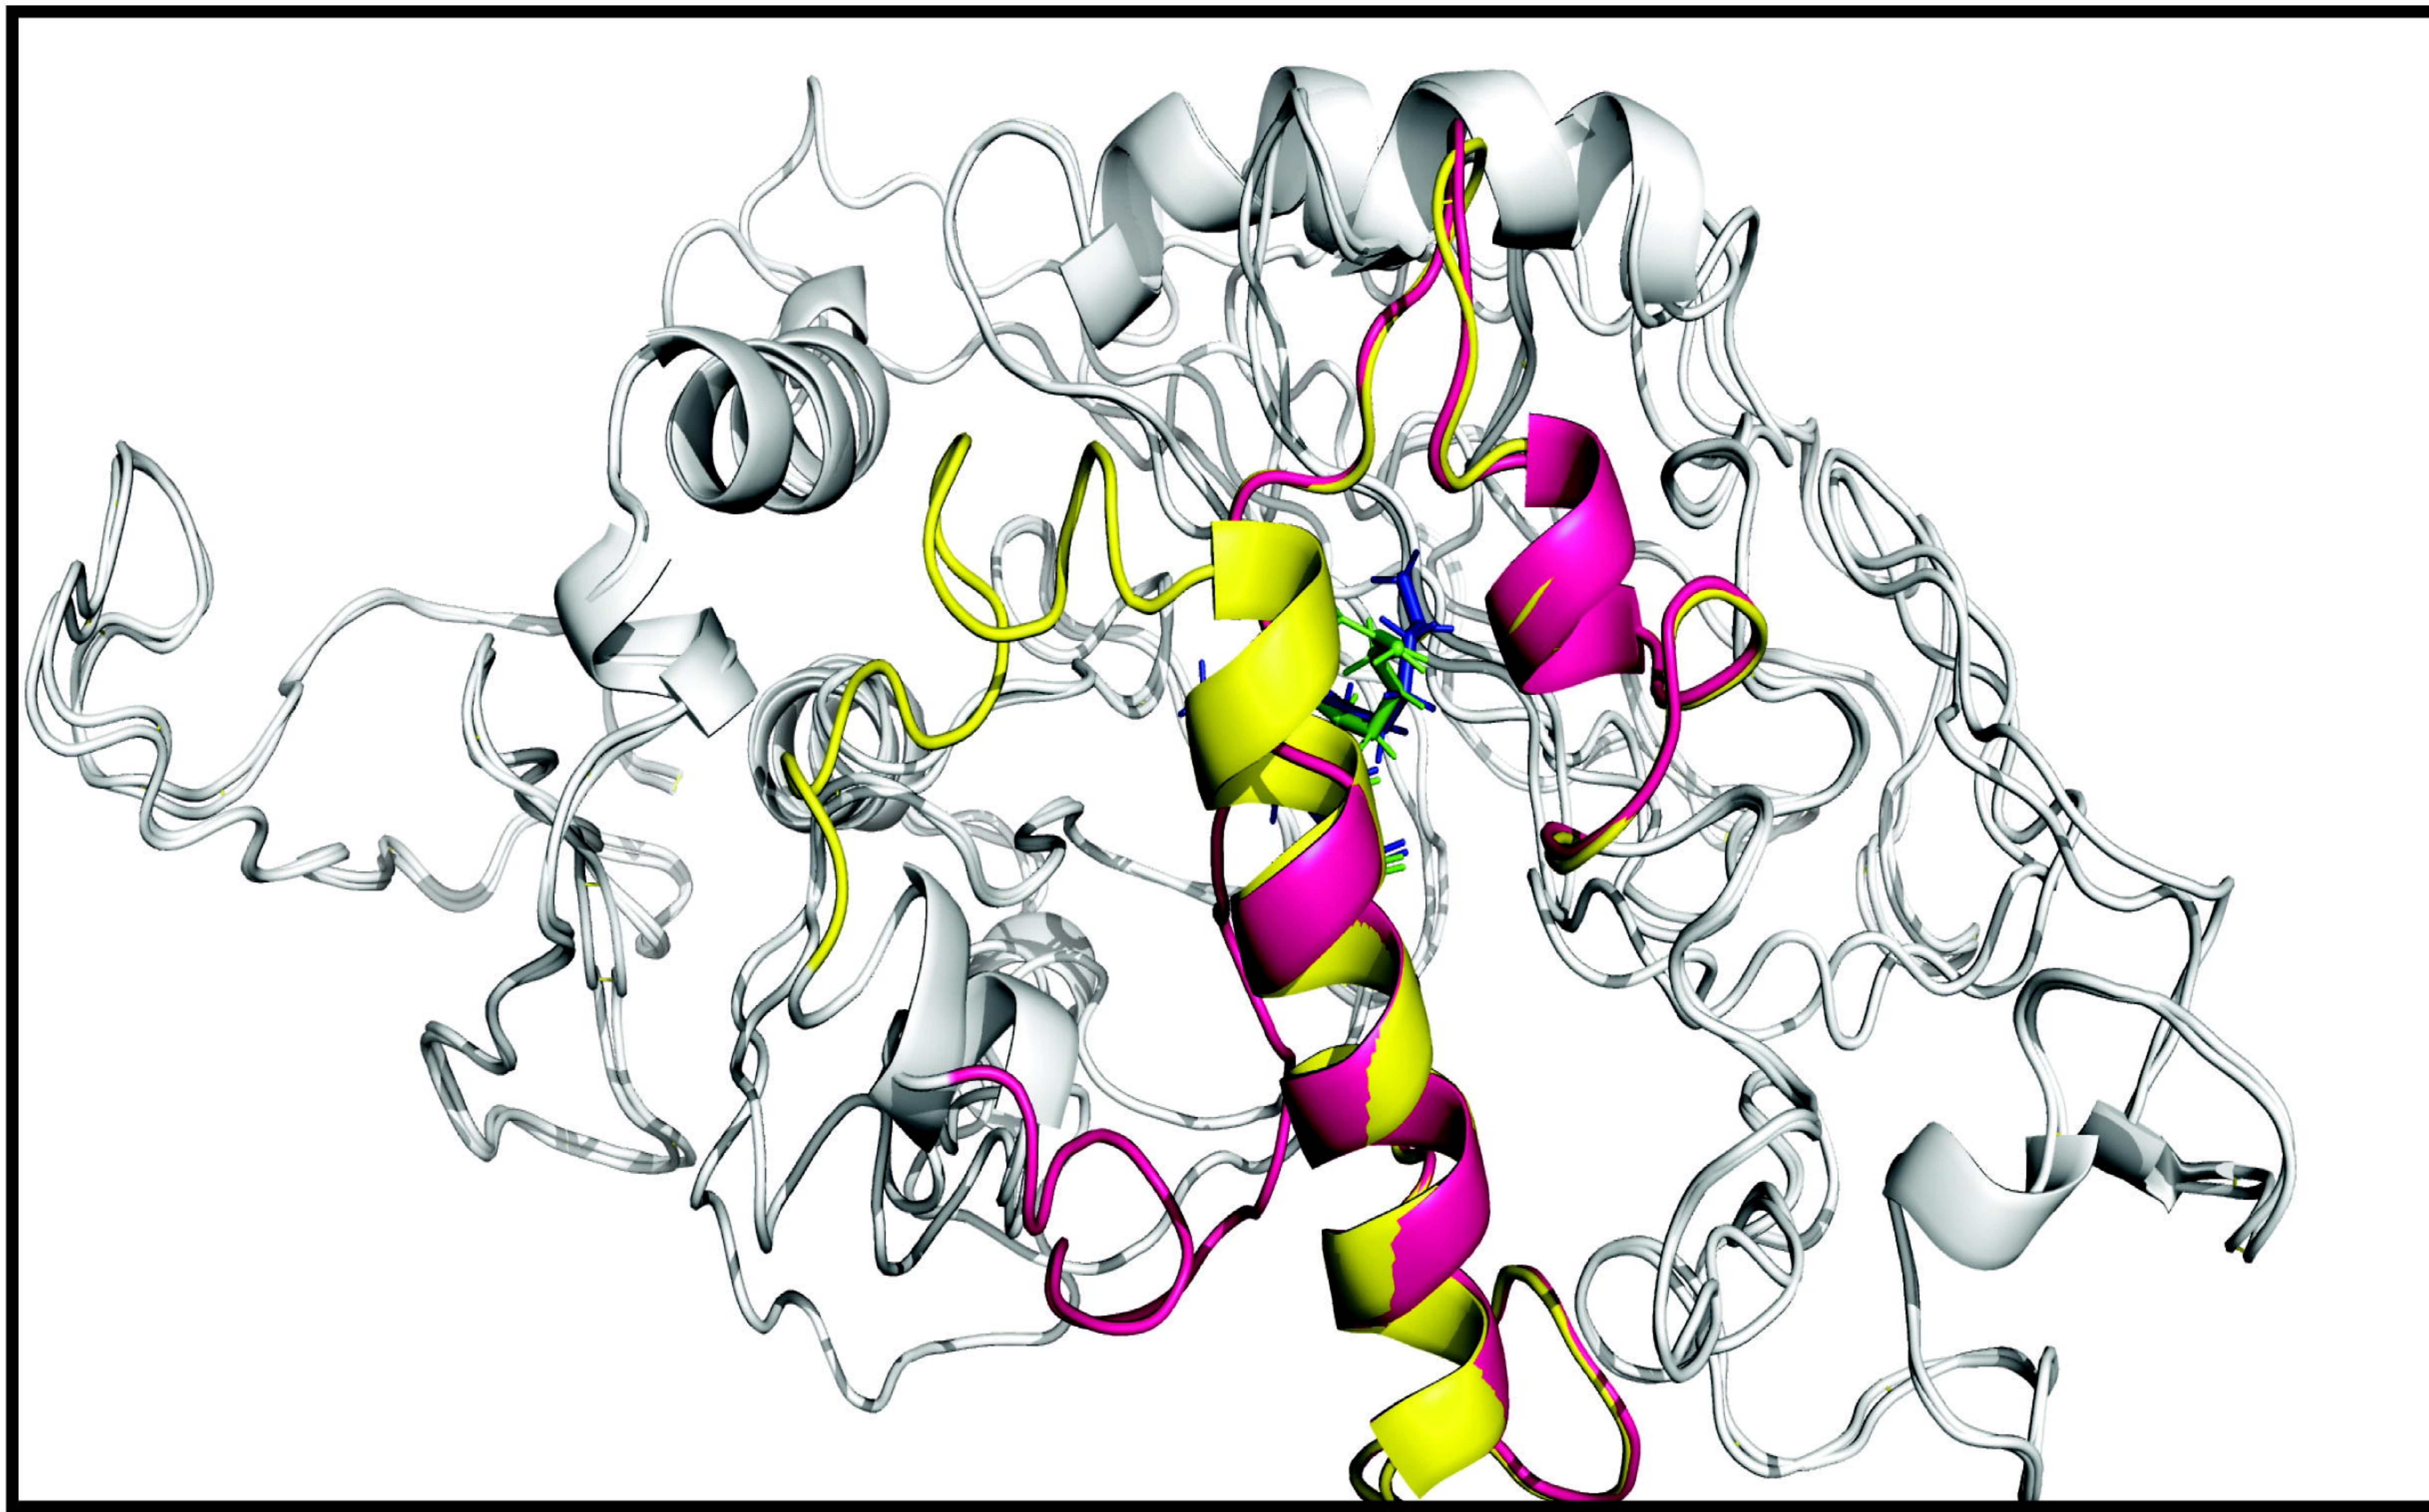

a

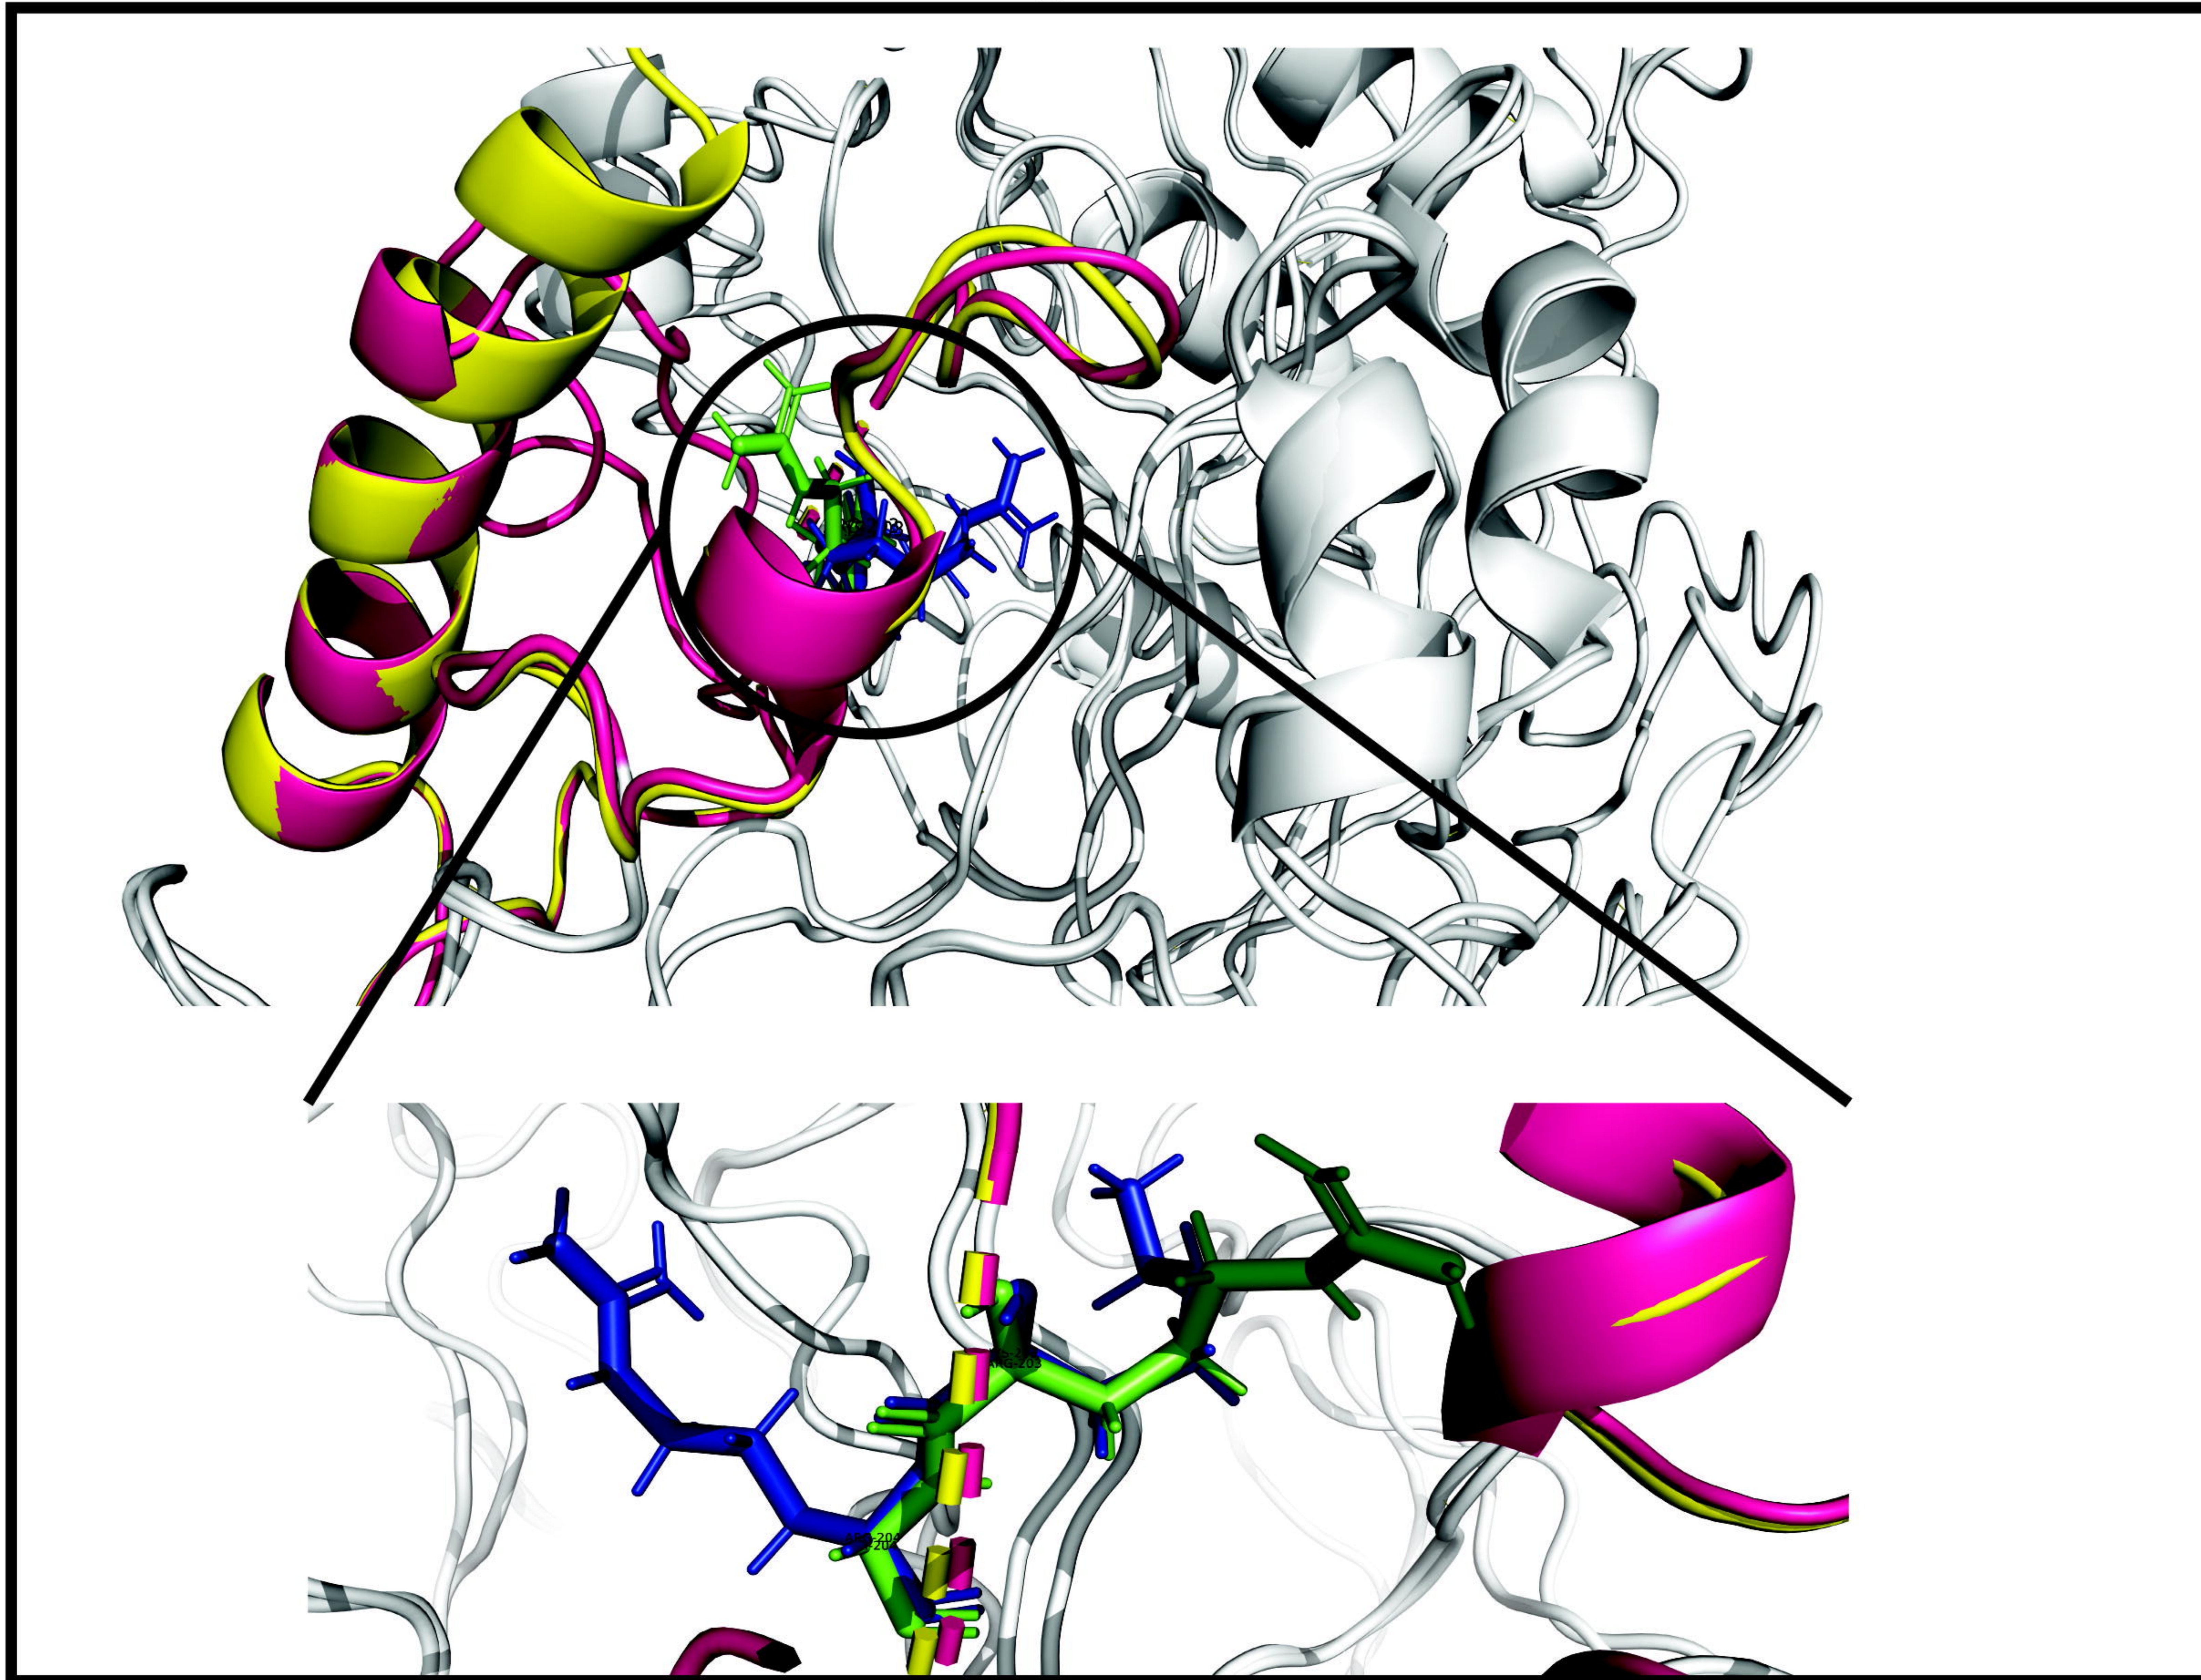

b
